# Supplementary material for: A Comprehensive Ab Initio Study of Halogenated A···U and G···C Base Pair Geometries and Energies
Source: MDPI journal article supplement (doi:10.3390/ijms24065530), 2023-03-14
Supplement: s1 [file s1]

# **A comprehensive *ab initio* study of halogenated A···U and G···C base pair geometries and energies**

Rosa M. Gomila<sup>a</sup>, Antonio Frontera<sup>a</sup> and Antonio Bauzá<sup>\*,a</sup>

<sup>a</sup>Department of Chemistry, Universitat de les Illes Balears, Crta. de Valldemossa km 7.5, 07122 Palma (Islas Baleares), SPAIN.

Fax: (+) 34 971 173426; E-mail: antonio.bauza@uib.es

## **Electronic Supplementary Information**

### **Index**

|                                                           |         |
|-----------------------------------------------------------|---------|
| <b>List of PDB structures</b>                             | page 2  |
| <b>Additional AIM analyses</b>                            | page 3  |
| <b>Cartesian coordinates of complexes 1 to 102</b>        | page 19 |
| <b>Cartesian coordinates of the selected PDB examples</b> | page 65 |

## List of PDB structures

### *PDB structures belonging to bound nucleic acid structures:*

3KDE, 3IL2, 1WTP, 4E10, 5A3D, 1JJ8, 1JJ6, 1BF4, 2H10, 2IRF, 1CKT, 2FCC, 3OH6, 3OGD, 3OH9, 1K3X, 7K30, 7K32, 4NOD, 3TQ6, 3BS1, 1AWC, 3VWB, 1AWC, 4HTU, 4HUE, 4HUG, 4HUF, 6UKF, 6UKE, 3BSU, 1P59, 2NLL, 1SRS, 1LEI, 1GA5, 1K61, 1AIS, 1ZME, 2RAM, 1A6Y, 1NH2, 2BSQ, 1FYI, 1DP7, 7R9F, 1LWW, 1IJW, 2Q2K.

### *PDB structures belonging to unbound nucleic acid structures:*

5V1K, 7EDT, 2R20, 2R1S, 2R21, 1KFO, 4P3T, 3TD0, 1ZCI, 1JZV, 7BPG, 7BPF, 7LO9, 3BNS, 3BNR, 3MEI, 3BNQ, 2OEU, 2FCX, 5VJB, 3P59, 3ZD5, 1Y3S, 1Y90, 3BNT, 2PN4, 3BNO, 1YXP, 5UX3, 1Y3O, 2PN3, 2JLT, 4P3U, 5XWG, 3LOA, 1KH6, 1OMK, 464D, 5AY3, 5D8T, 5AY2, 4L26, 1DN5, 1J9H, 6CY2, 6HC5, 1IH6, 2G91, 6LBW, 5LQT, 6HBX, 1DN4, 5NEP, 242D, 5LR3, 6HBT, 5NEO, 5NEQ, 5AY4, 1UHY, 1LNT, 6YL5, 5NEX, 421D, 1V3N, 5V2H, 5LR4, 5NDH, 6CY4, 5LQO, 5NWQ, 5NEF, 5NOM, 318D, 238D, 1UHX, 5T5A, 5NZD, 6YMK, 5NY8, 6YMJ, 5NZ3, 376D, 430D, 6TF0, 5O62, 6YLB, 6YML, 319D, 6YMM, 1F6J, 4BNA, 458D, 5O69, 6CY0, 5LR5, 6FZ0, 6YMI, 5NDI, 2GOT, 7ECK, 2PIS, 1IH2, 5NZ6, 6TFH, 3BNA, 7ECL, 7ECJ, 6R47, 2FZA, 1MDG, 1N7A, 2AWE, 4XSN, 3R1E, 6JKN, 3R1D, 3IBK, 6M4T, 6WCK, 2XC6, 6IYQ, 6JJE, 6ROR, 2WNA, 2GRB, 4MGM, 3JXQ, 3JXR, 1DNF, 2AO5, 1UE2, 1V3O, 5UZA, 1V3P, 1JZV, 1ANA.

## Additional AIM analyses

### U...A – binding mode a

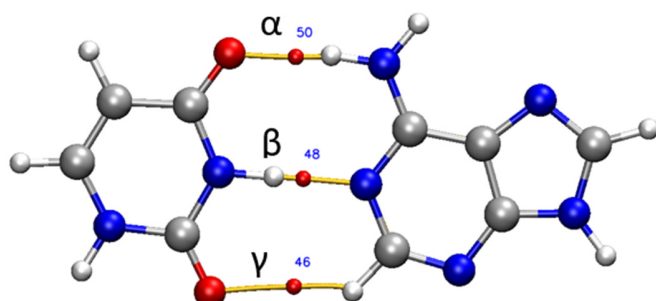

Table S1.

| Complex   | $\rho \cdot 10^2 (\alpha)$ | $\rho \cdot 10^2 (\beta)$ | $\rho \cdot 10^2 (\gamma)$ |
|-----------|----------------------------|---------------------------|----------------------------|
| 1 (U...A) | 2.50                       | 4.73                      | 0.57                       |

### 5HalU...A – binding mode a

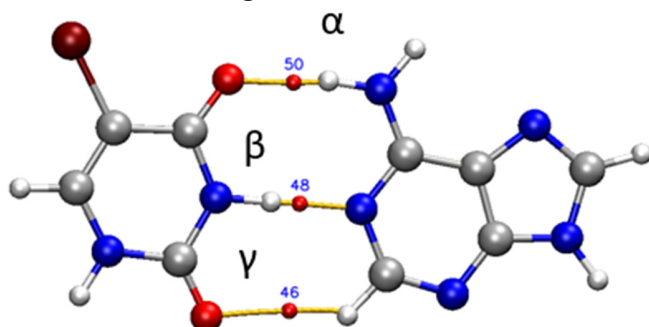

Table S2.

| Complex     | $\rho \cdot 10^2 (\alpha)$ | $\rho \cdot 10^2 (\beta)$ | $\rho \cdot 10^2 (\gamma)$ |
|-------------|----------------------------|---------------------------|----------------------------|
| 2 (FU...A)  | 2.48                       | 4.85                      | 0.57                       |
| 3 (ClU...A) | 2.46                       | 4.81                      | 0.57                       |
| 4 (BrU...A) | 2.51                       | 4.88                      | 0.58                       |
| 5 (IU...A)  | 2.55                       | 4.95                      | 0.58                       |

**U...8HalA – binding mode a**

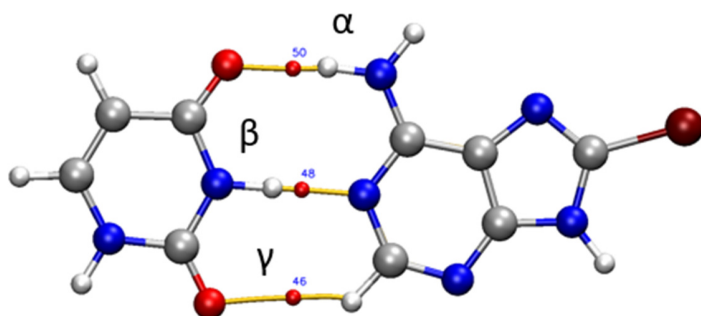

**Table S3.**

| Complex            | $\rho \cdot 10^2$ ( $\alpha$ ) | $\rho \cdot 10^2$ ( $\beta$ ) | $\rho \cdot 10^2$ ( $\gamma$ ) |
|--------------------|--------------------------------|-------------------------------|--------------------------------|
| <b>6 (U...FA)</b>  | 2.62                           | 4.44                          | 0.50                           |
| <b>7 (U...CIA)</b> | 2.54                           | 4.48                          | 0.53                           |
| <b>8 (U...BrA)</b> | 2.64                           | 4.76                          | 0.58                           |
| <b>9 (U...IA)</b>  | 2.65                           | 4.46                          | 0.50                           |

**5HalU...8HalA – binding mode a**

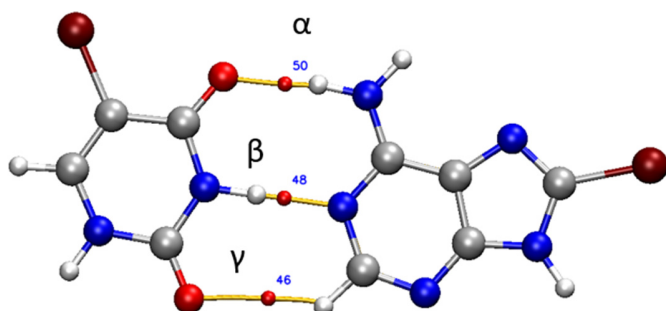

**Table S4.**

| Complex               | $\rho \cdot 10^2$ ( $\alpha$ ) | $\rho \cdot 10^2$ ( $\beta$ ) | $\rho \cdot 10^2$ ( $\gamma$ ) |
|-----------------------|--------------------------------|-------------------------------|--------------------------------|
| <b>10 (FU...FA)</b>   | 2.47                           | 4.75                          | 0.57                           |
| <b>11 (CIU...CIA)</b> | 2.52                           | 4.71                          | 0.56                           |
| <b>12 (BrU...BrA)</b> | 2.54                           | 4.73                          | 0.56                           |
| <b>13 (IU...IA)</b>   | 2.54                           | 4.74                          | 0.56                           |

**U⋯A – binding mode b**

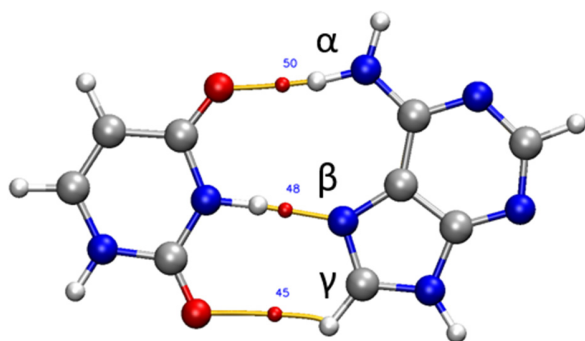

**Table S5.**

| Complex  | $\rho \cdot 10^2 (\alpha)$ | $\rho \cdot 10^2 (\beta)$ | $\rho \cdot 10^2 (\gamma)$ |
|----------|----------------------------|---------------------------|----------------------------|
| 14 (U⋯A) | 2.22                       | 4.81                      | 0.61                       |

**5HalU⋯A – binding mode b**

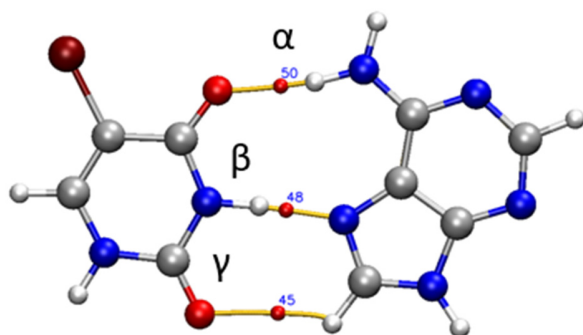

**Table S6.**

| Complex    | $\rho \cdot 10^2 (\alpha)$ | $\rho \cdot 10^2 (\beta)$ | $\rho \cdot 10^2 (\gamma)$ |
|------------|----------------------------|---------------------------|----------------------------|
| 15 (FU⋯A)  | 2.18                       | 4.91                      | 0.62                       |
| 16 (ClU⋯A) | 2.19                       | 4.88                      | 0.61                       |
| 17 (BrU⋯A) | 2.22                       | 4.96                      | 0.62                       |
| 18 (IU⋯A)  | 2.19                       | 4.88                      | 0.62                       |

**U...5HalA – binding mode b**

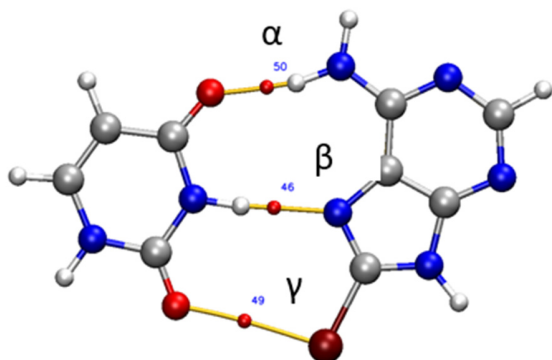

**Table S7.**

| Complex      | $\rho \cdot 10^2 (\alpha)$ | $\rho \cdot 10^2 (\beta)$ | $\rho \cdot 10^2 (\gamma)$ |
|--------------|----------------------------|---------------------------|----------------------------|
| 19 (U...FA)  | 2.75                       | 2.94                      | 0.44                       |
| 20 (U...CIA) | 2.90                       | 2.40                      | 0.76                       |
| 21 (U...BrA) | 2.95                       | 2.15                      | 0.81                       |
| 22 (U...IA)  | 2.89                       | 1.98                      | 0.92                       |

**5HalU...8HalA – binding mode b**

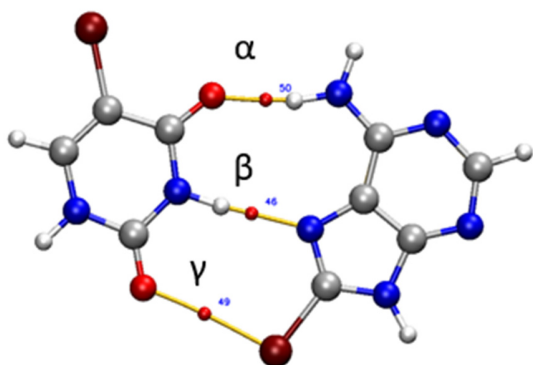

**Table S8.**

| Complex        | $\rho \cdot 10^2 (\alpha)$ | $\rho \cdot 10^2 (\beta)$ | $\rho \cdot 10^2 (\gamma)$ |
|----------------|----------------------------|---------------------------|----------------------------|
| 23 (FU...FA)   | 2.63                       | 3.07                      | 0.48                       |
| 24 (CIU...CIA) | 2.83                       | 2.47                      | 0.62                       |
| 25 (BrU...BrA) | 2.87                       | 2.20                      | 0.84                       |
| 26 (IU...IA)   | 2.90                       | 2.00                      | 0.93                       |

U⋯A – binding mode c

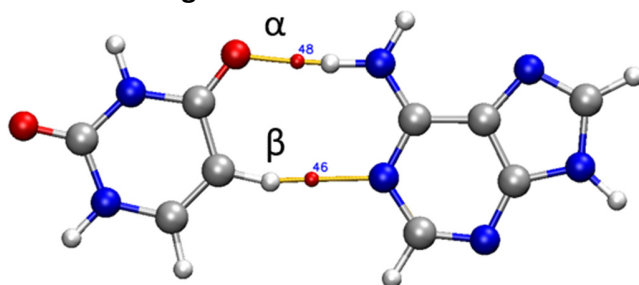

Table S9.

| Complex  | $\rho \cdot 10^2 (\alpha)$ | $\rho \cdot 10^2 (\beta)$ |
|----------|----------------------------|---------------------------|
| 27 (U⋯A) | 2.44                       | 1.47                      |

5HalU⋯A – binding mode c

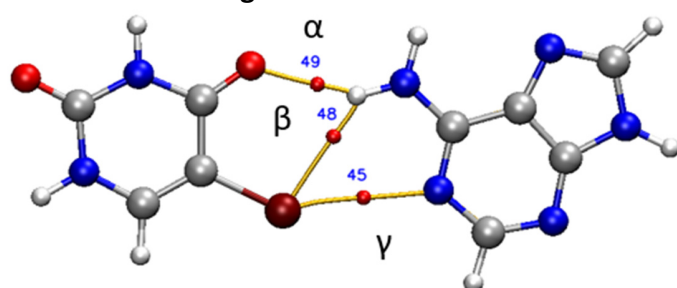

Table S10.

| Complex    | $\rho \cdot 10^2 (\alpha)$ | $\rho \cdot 10^2 (\beta)$ | $\rho \cdot 10^2 (\gamma)$ |
|------------|----------------------------|---------------------------|----------------------------|
| 28 (FU⋯A)  | 1.58                       | -                         | 0.24                       |
| 29 (ClU⋯A) | 1.43                       | 0.66                      | 0.87                       |
| 30 (BrU⋯A) | 1.18                       | 0.83                      | 1.16                       |
| 31 (IU⋯A)  | 0.91                       | 0.97                      | 1.41                       |

**U...8HalA – binding mode c**

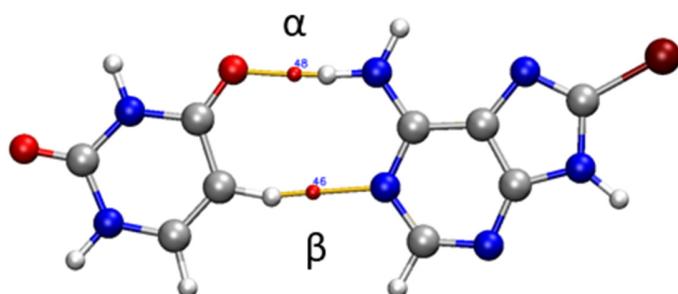

**Table S11.**

| Complex             | $\rho \cdot 10^2 (\alpha)$ | $\rho \cdot 10^2 (\beta)$ |
|---------------------|----------------------------|---------------------------|
| <b>32 (U...FA)</b>  | 2.49                       | 1.43                      |
| <b>33 (U...CIA)</b> | 2.51                       | 1.43                      |
| <b>34 (U...BrA)</b> | 2.52                       | 1.42                      |
| <b>35 (U...IA)</b>  | 2.51                       | 1.43                      |

**5HalU...8HalA – binding mode c**

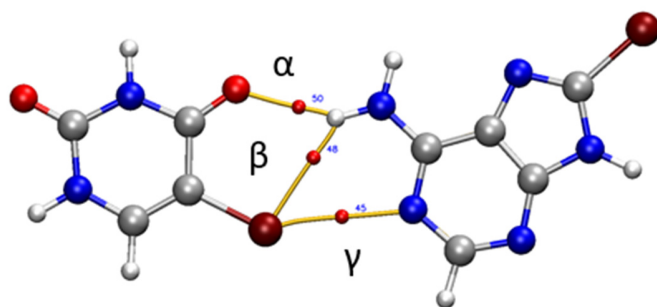

**Table S12.**

| Complex               | $\rho \cdot 10^2 (\alpha)$ | $\rho \cdot 10^2 (\beta)$ | $\rho \cdot 10^2 (\gamma)$ |
|-----------------------|----------------------------|---------------------------|----------------------------|
| <b>36 (FU...FA)</b>   | 1.74                       | -                         | 0.25                       |
| <b>37 (CIU...CIA)</b> | 1.47                       | 0.65                      | 0.89                       |
| <b>38 (BrU...BrA)</b> | 1.22                       | 0.80                      | 1.13                       |
| <b>39 (IU...IA)</b>   | 0.95                       | 0.94                      | 1.35                       |



**U...A – binding mode d**

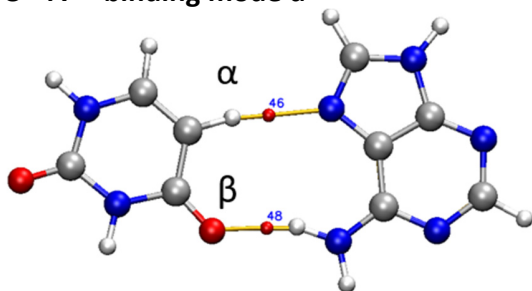

**Table S13.**

| Complex           | $\rho \cdot 10^2 (\alpha)$ | $\rho \cdot 10^2 (\beta)$ |
|-------------------|----------------------------|---------------------------|
| <b>40 (U...A)</b> | 1.41                       | 2.22                      |

**5HalU...A – binding mode d**

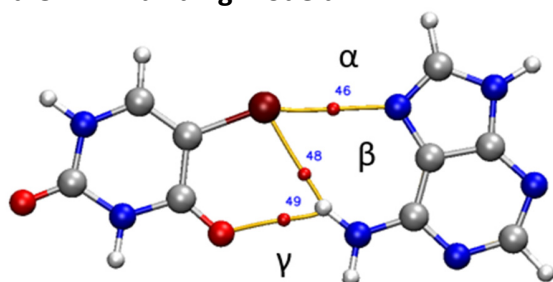

**Table S14.**

| Complex             | $\rho \cdot 10^2 (\alpha)$ | $\rho \cdot 10^2 (\beta)$ | $\rho \cdot 10^2 (\gamma)$ |
|---------------------|----------------------------|---------------------------|----------------------------|
| <b>41 (FU...A)</b>  | 0.26                       | -                         | 1.16                       |
| <b>42 (ClU...A)</b> | 0.99                       | 0.78                      | 1.10                       |
| <b>43 (BrU...A)</b> | 1.42                       | 1.02                      | 0.93                       |
| <b>44 (IU...A)</b>  | 1.84                       | 1.26                      | 0.72                       |

**U...8HalA – binding mode d**

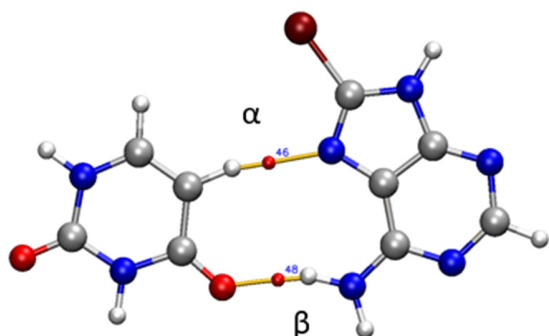

**Table S15.**

| Complex      | $\rho \cdot 10^2$ ( $\alpha$ ) | $\rho \cdot 10^2$ ( $\beta$ ) | $\rho \cdot 10^2$ ( $\gamma$ ) |
|--------------|--------------------------------|-------------------------------|--------------------------------|
| 45 (U...FA)  | 1.34                           | 2.24                          | -                              |
| 45 (U...CIA) | 1.45                           | 2.26                          | -                              |
| 47 (U...BrA) | 1.49                           | 2.26                          | -                              |
| 48 (U...IA)  | 1.57                           | 2.24                          | 0.17                           |

**5HalU...8HalA – binding mode d**

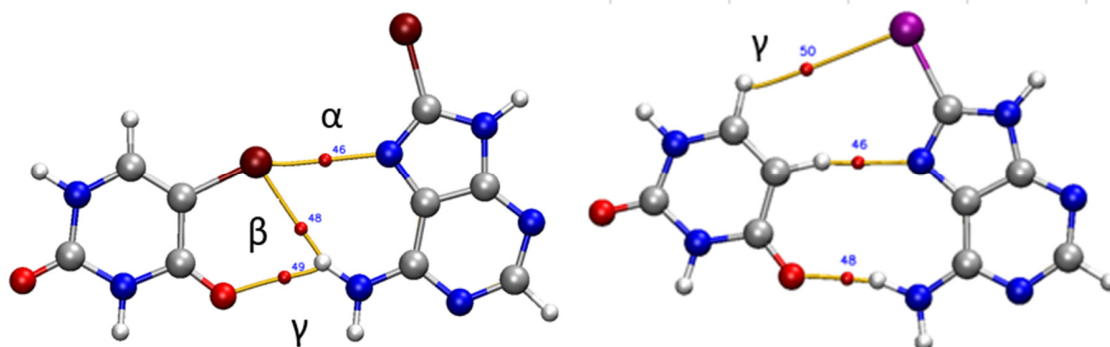

**Table S16.**

| Complex        | $\rho \cdot 10^2$ ( $\alpha$ ) | $\rho \cdot 10^2$ ( $\beta$ ) | $\rho \cdot 10^2$ ( $\gamma$ ) |
|----------------|--------------------------------|-------------------------------|--------------------------------|
| 49 (FU...FA)   | 0.27                           | -                             | 1.31                           |
| 50 (CIU...CIA) | 1.07                           | 0.75                          | 1.14                           |
| 51 (BrU...BrA) | 1.42                           | 0.95                          | 0.97                           |
| 52 (IU...IA)   | 1.82                           | 1.16                          | 0.78                           |

**C⋯G – binding mode a**

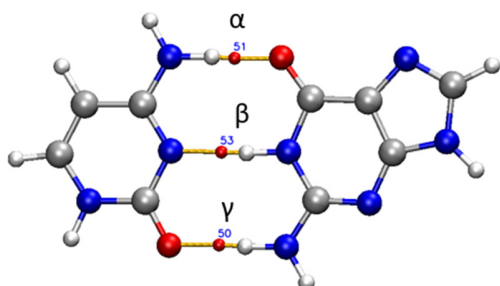

**Table S17.**

| Complex         | $\rho \cdot 10^2 (\alpha)$ | $\rho \cdot 10^2 (\beta)$ | $\rho \cdot 10^2 (\gamma)$ |
|-----------------|----------------------------|---------------------------|----------------------------|
| <b>53 (C⋯G)</b> | 4.18                       | 3.52                      | 2.82                       |

**5HalC⋯G – binding mode a**

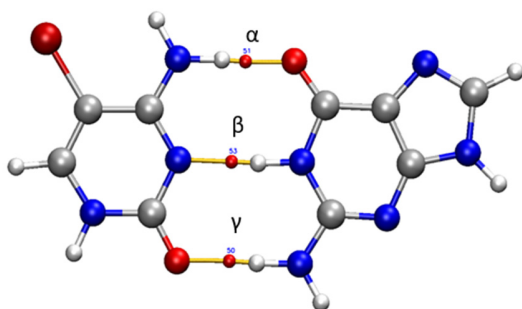

**Table S18.**

| Complex           | $\rho \cdot 10^2 (\alpha)$ | $\rho \cdot 10^2 (\beta)$ | $\rho \cdot 10^2 (\gamma)$ |
|-------------------|----------------------------|---------------------------|----------------------------|
| <b>54 (FC⋯G)</b>  | 4.23                       | 3.49                      | 2.77                       |
| <b>55 (ClC⋯G)</b> | 4.32                       | 3.45                      | 2.78                       |
| <b>56 (BrC⋯G)</b> | 4.32                       | 3.42                      | 2.80                       |
| <b>57 (IC⋯G)</b>  | 4.34                       | 3.40                      | 2.82                       |

**C⋯8HalG – binding mode a**

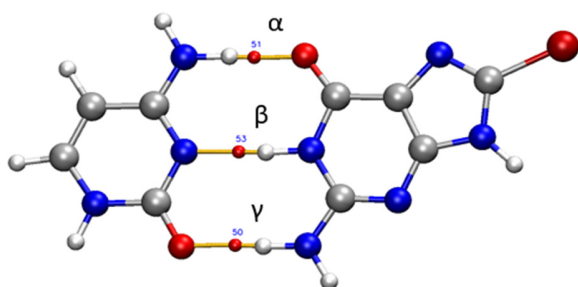

**Table S19.**

| Complex           | $\rho \cdot 10^2 (\alpha)$ | $\rho \cdot 10^2 (\beta)$ | $\rho \cdot 10^2 (\gamma)$ |
|-------------------|----------------------------|---------------------------|----------------------------|
| <b>58 (C⋯FG)</b>  | 4.17                       | 3.56                      | 2.84                       |
| <b>59 (C⋯ClG)</b> | 4.10                       | 3.55                      | 2.87                       |
| <b>60 (C⋯BrG)</b> | 4.12                       | 3.55                      | 2.85                       |
| <b>61 (C⋯IG)</b>  | 4.08                       | 3.55                      | 2.86                       |

**5HalC⋯8HalG – binding mode a**

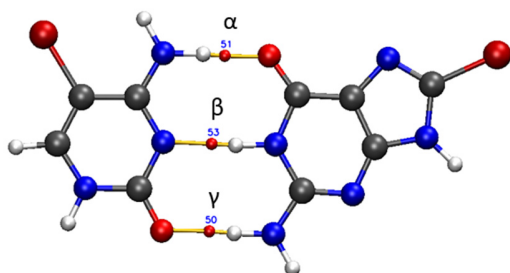

**Table S20.**

| Complex             | $\rho \cdot 10^2 (\alpha)$ | $\rho \cdot 10^2 (\beta)$ | $\rho \cdot 10^2 (\gamma)$ |
|---------------------|----------------------------|---------------------------|----------------------------|
| <b>62 (FC⋯FG)</b>   | 4.16                       | 3.50                      | 2.79                       |
| <b>63 (ClC⋯ClG)</b> | 4.26                       | 3.47                      | 2.81                       |
| <b>64 (BrC⋯BrG)</b> | 4.26                       | 3.45                      | 2.84                       |
| <b>65 (IC⋯IG)</b>   | 4.27                       | 3.44                      | 2.85                       |

**C⋯G – binding mode b**

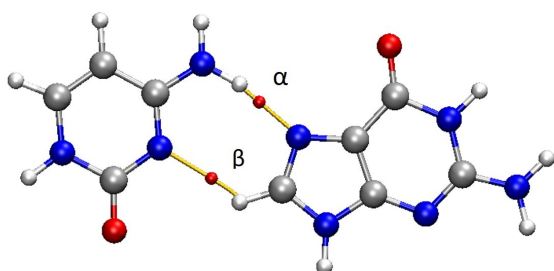

**Table S21.**

| Complex  | $\rho \cdot 10^2 (\alpha)$ | $\rho \cdot 10^2 (\beta)$ |
|----------|----------------------------|---------------------------|
| 66 (C⋯G) | 3.05                       | 1.46                      |

**5HalC⋯G – binding mode b**

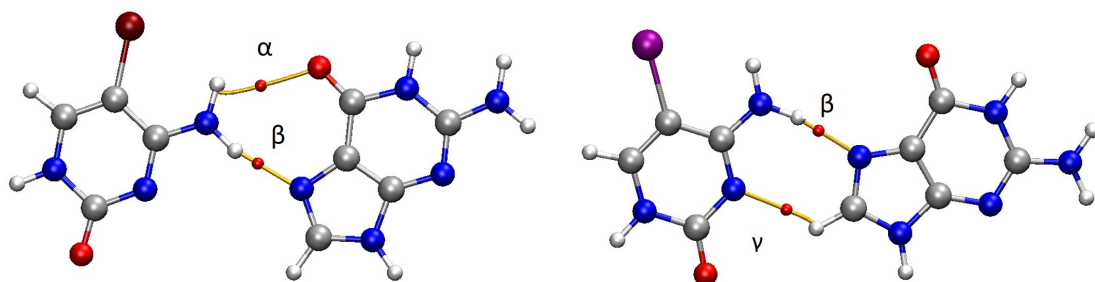

**Table S22.**

| Complex    | $\rho \cdot 10^2 (\alpha)$ | $\rho \cdot 10^2 (\beta)$ | $\rho \cdot 10^2 (\gamma)$ |
|------------|----------------------------|---------------------------|----------------------------|
| 67 (FC⋯G)  | 1.67                       | 1.79                      | -                          |
| 68 (ClC⋯G) | 1.76                       | 1.72                      | -                          |
| 69 (BrC⋯G) | 0.65                       | 2.81                      | -                          |
| 70 (IC⋯G)  | -                          | 3.26                      | 1.39                       |

**C⋯8HalG – binding mode b**

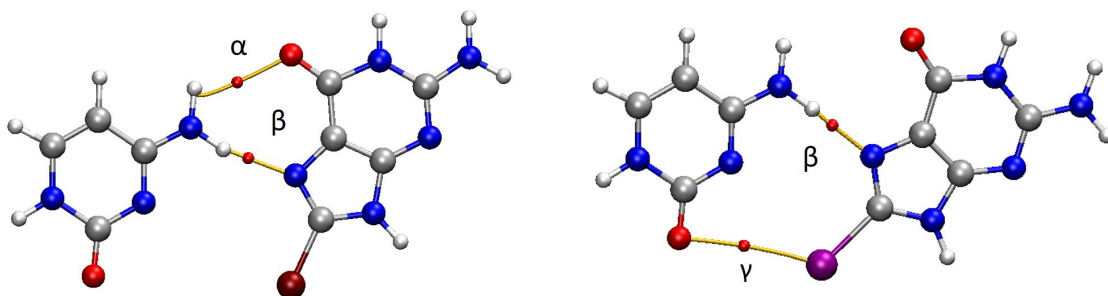

**Table S23.**

| Complex           | $\rho \cdot 10^2$ ( $\alpha$ ) | $\rho \cdot 10^2$ ( $\beta$ ) | $\rho \cdot 10^2$ ( $\gamma$ ) |
|-------------------|--------------------------------|-------------------------------|--------------------------------|
| <b>71 (FC⋯G)</b>  | 2.12                           | -                             | -                              |
| <b>72 (ClC⋯G)</b> | 0.63                           | 2.60                          | 0.13                           |
| <b>73 (BrC⋯G)</b> | 0.62                           | 2.60                          | -                              |
| <b>74 (IC⋯G)</b>  | -                              | 2.80                          | 0.52                           |

**8HalC⋯8HalG – binding mode b**

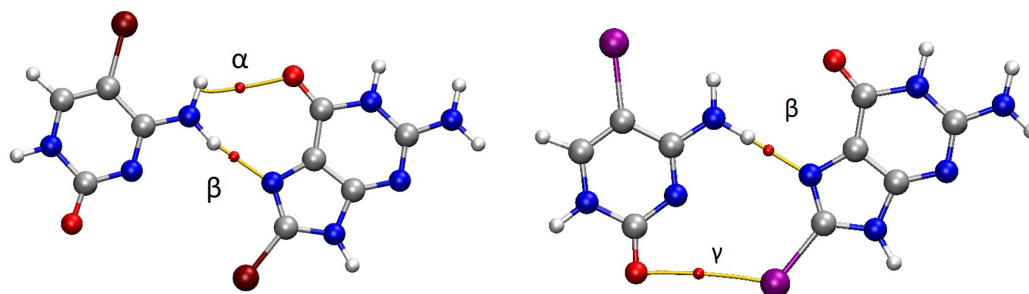

**Table S24.**

| Complex           | $\rho \cdot 10^2$ ( $\alpha$ ) | $\rho \cdot 10^2$ ( $\beta$ ) | $\rho \cdot 10^2$ ( $\gamma$ ) |
|-------------------|--------------------------------|-------------------------------|--------------------------------|
| <b>75 (FC⋯G)</b>  | 1.63                           | 1.56                          | -                              |
| <b>76 (ClC⋯G)</b> | 1.66                           | 1.57                          | -                              |
| <b>77 (BrC⋯G)</b> | 0.64                           | 2.66                          | -                              |
| <b>78 (IC⋯G)</b>  | -                              | 2.92                          | 0.53                           |

**C⋯G – binding mode c**

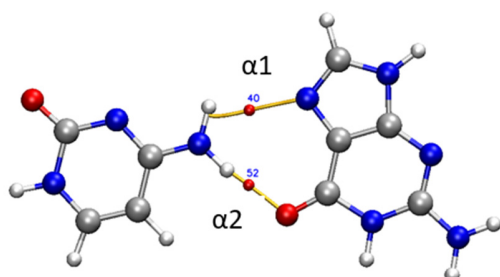

**Table S25.**

| Complex         | $\rho \cdot 10^2 (\alpha_1)$ | $\rho \cdot 10^2 (\alpha_2)$ |
|-----------------|------------------------------|------------------------------|
| <b>79 (C⋯G)</b> | 0.84                         | 2.21                         |

**5HalC⋯G – binding mode c**

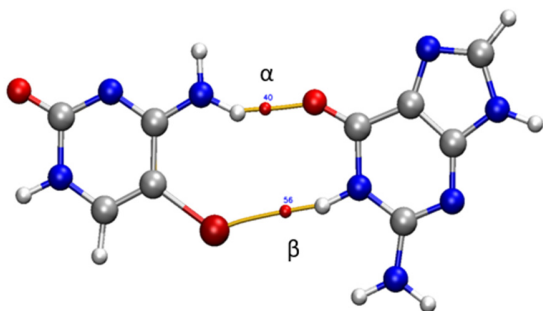

**Table S26.**

| Complex           | $\rho \cdot 10^2 (\alpha)$ | $\rho \cdot 10^2 (\beta)$ |
|-------------------|----------------------------|---------------------------|
| <b>80 (FC⋯G)</b>  | 2.64                       | 1.38                      |
| <b>81 (ClC⋯G)</b> | 2.31                       | 0.86                      |
| <b>82 (BrC⋯G)</b> | 2.24                       | 0.82                      |
| <b>83 (IC⋯G)</b>  | 2.18                       | 0.83                      |

**C...8HalG – binding mode c**

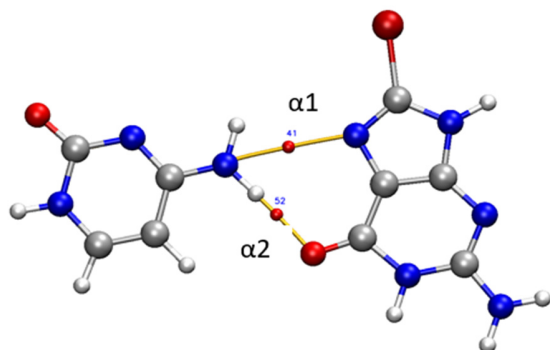

**Table S27.**

| Complex      | $\rho \cdot 10^2 (\alpha1)$ | $\rho \cdot 10^2 (\alpha2)$ |
|--------------|-----------------------------|-----------------------------|
| 84 (FC...G)  | 0.60                        | 2.12                        |
| 85 (ClC...G) | 0.64                        | 2.11                        |
| 86 (BrC...G) | 0.66                        | 2.11                        |
| 87 (IC...G)  | 0.74                        | 2.12                        |

**5HalC...8HalG – binding mode c**

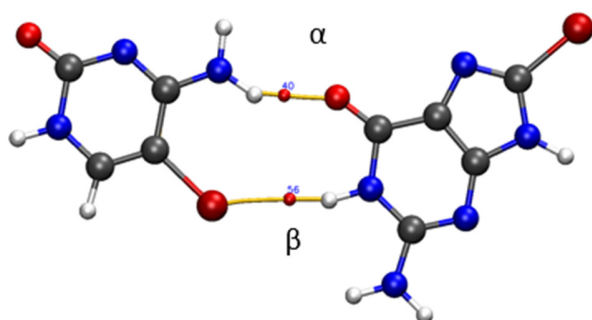

**Table S28.**

| Complex        | $\rho \cdot 10^2 (\alpha)$ | $\rho \cdot 10^2 (\beta)$ |
|----------------|----------------------------|---------------------------|
| 88 (FC...FG)   | 2.61                       | 1.37                      |
| 89 (ClC...ClG) | 2.28                       | 0.86                      |
| 90 (BrC...BrG) | 2.22                       | 0.83                      |
| 91 (IC...IG)   | 2.16                       | 0.83                      |



**C...G – binding mode d**

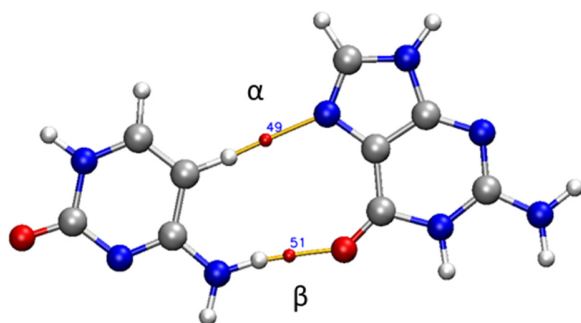

**Table S29.**

| Complex    | $\rho \cdot 10^2 (\alpha)$ | $\rho \cdot 10^2 (\beta)$ |
|------------|----------------------------|---------------------------|
| 92 (C...G) | 1.01                       | 2.06                      |

**5HalC...G – binding mode d**

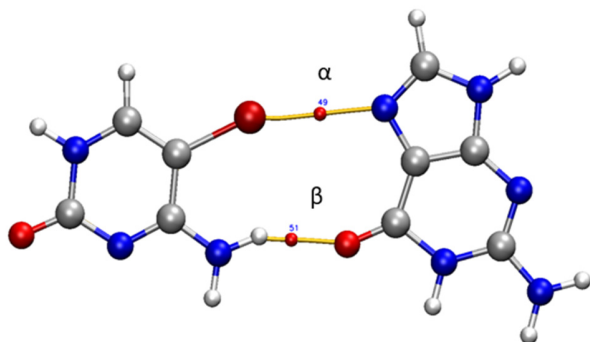

**Table S30.**

| Complex      | $\rho \cdot 10^2 (\alpha)$ | $\rho \cdot 10^2 (\beta)$ |
|--------------|----------------------------|---------------------------|
| 93 (FC...G)  | 0.31                       | 1.91                      |
| 94 (ClC...G) | 0.93                       | 1.92                      |
| 95 (BrC...G) | 1.16                       | 1.70                      |
| 96 (IC...G)  | 1.49                       | 1.44                      |

**C⋯8HalG – binding mode d**

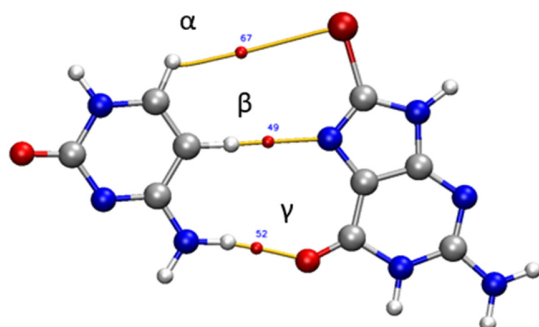

**Table S31.**

| Complex    | $\rho \cdot 10^2 (\alpha)$ | $\rho \cdot 10^2 (\beta)$ | $\rho \cdot 10^2 (\gamma)$ |
|------------|----------------------------|---------------------------|----------------------------|
| 97 (C⋯FG)  | -                          | 0.95                      | 1.99                       |
| 98 (C⋯ClG) | -                          | 1.07                      | 1.95                       |
| 99 (C⋯BrG) | 0.057                      | 1.11                      | 1.93                       |
| 100 (C⋯IG) | 0.001                      | 1.20                      | 1.88                       |

**5HalC⋯8HalG – binding mode d**

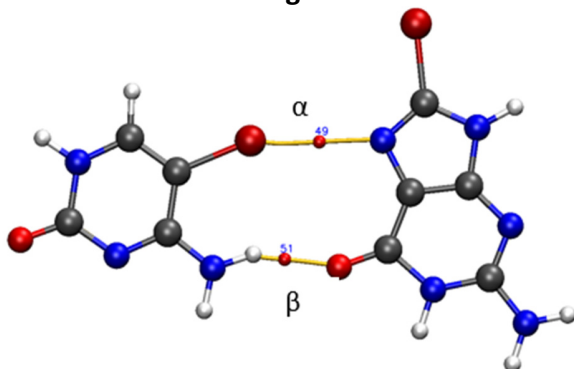

**Table S32.**

| Complex     | $\rho \cdot 10^2 (\alpha)$ | $\rho \cdot 10^2 (\beta)$ |
|-------------|----------------------------|---------------------------|
| 101 (FC⋯G)  | 0.47                       | 2.01                      |
| 102 (ClC⋯G) | 0.90                       | 1.82                      |
| 103 (BrC⋯G) | 1.15                       | 1.69                      |
| 104 (IC⋯G)  | 1.48                       | 1.43                      |

## Cartesian coordinates of complexes 1 to 104:

### Binding mode a

#### 1 (U...A)

|   |            |            |           |
|---|------------|------------|-----------|
| C | 0.6885691  | -2.8865830 | 0.0000000 |
| C | -0.6181847 | -3.3736194 | 0.0000000 |
| C | -1.4914857 | -1.3570324 | 0.0000000 |
| C | 0.8365593  | -1.4861380 | 0.0000000 |
| C | 0.8696073  | -4.9960881 | 0.0000000 |
| N | 1.6135980  | -3.9034446 | 0.0000000 |
| N | -0.4733607 | -4.7384795 | 0.0000000 |
| H | -1.2257897 | -5.4112193 | 0.0000000 |
| N | 2.0332729  | -0.8858887 | 0.0000000 |
| N | -0.2861081 | -0.7493506 | 0.0000000 |
| N | -1.7513249 | -2.6600404 | 0.0000000 |
| H | 2.8578550  | -1.4625518 | 0.0000000 |
| H | 2.1009033  | 0.1308524  | 0.0000000 |
| C | -1.5552268 | 2.6432498  | 0.0000000 |
| C | 0.9158030  | 2.7044922  | 0.0000000 |
| C | 0.8460648  | 4.1527049  | 0.0000000 |
| C | -0.3622202 | 4.7536235  | 0.0000000 |
| H | -0.3007713 | 1.0105900  | 0.0000000 |
| H | -0.4807599 | 5.8299974  | 0.0000000 |
| H | -2.4243178 | 4.4815011  | 0.0000000 |
| N | -0.3108538 | 2.0619152  | 0.0000000 |
| O | 1.9638658  | 2.0580437  | 0.0000000 |
| O | -2.6012651 | 2.0187062  | 0.0000000 |
| N | -1.5217210 | 4.0298932  | 0.0000000 |
| H | -2.3413289 | -0.6814768 | 0.0000000 |
| H | 1.2552030  | -6.0047335 | 0.0000000 |
| H | 1.7634171  | 4.7210764  | 0.0000000 |

#### 2 (FU...A)

|   |            |            |           |
|---|------------|------------|-----------|
| C | 0.6719770  | -2.8901323 | 0.0000000 |
| C | -0.6355895 | -3.3744450 | 0.0000000 |
| C | -1.5047850 | -1.3553996 | 0.0000000 |
| C | 0.8231757  | -1.4901866 | 0.0000000 |
| C | 0.8488085  | -4.9997583 | 0.0000000 |
| N | 1.5950445  | -3.9085720 | 0.0000000 |
| N | -0.4936364 | -4.7393817 | 0.0000000 |
| H | -1.2472768 | -5.4109678 | 0.0000000 |
| N | 2.0223973  | -0.8947717 | 0.0000000 |
| N | -0.2974889 | -0.7494595 | 0.0000000 |
| N | -1.7667195 | -2.6575581 | 0.0000000 |
| H | 2.8455629  | -1.4735308 | 0.0000000 |
| H | 2.0956378  | 0.1202605  | 0.0000000 |
| C | -1.5606835 | 2.6474166  | 0.0000000 |
| C | 0.9169639  | 2.6783567  | 0.0000000 |
| C | 0.8329516  | 4.1303626  | 0.0000000 |
| C | -0.3579428 | 4.7565150  | 0.0000000 |
| H | -0.3106174 | 1.0010682  | 0.0000000 |
| H | -0.4405515 | 5.8350428  | 0.0000000 |
| H | -2.4196596 | 4.4891365  | 0.0000000 |
| N | -0.3144396 | 2.0565064  | 0.0000000 |
| O | 1.9710930  | 2.0497450  | 0.0000000 |
| O | -2.6050706 | 2.0201238  | 0.0000000 |
| N | -1.5216423 | 4.0289677  | 0.0000000 |
| F | 1.9742257  | 4.8189923  | 0.0000000 |
| H | -2.3539370 | -0.6790427 | 0.0000000 |
| H | 1.2322026  | -6.0092878 | 0.0000000 |

#### 3 (CIU...A)

|   |            |            |           |
|---|------------|------------|-----------|
| C | 0.6675481  | -2.8980175 | 0.0000000 |
| C | -0.6388344 | -3.3854284 | 0.0000000 |
| C | -1.5119389 | -1.3680944 | 0.0000000 |
| C | 0.8158550  | -1.4977122 | 0.0000000 |

|    |            |            |           |
|----|------------|------------|-----------|
| C  | 0.8492867  | -5.0073318 | 0.0000000 |
| N  | 1.5929318  | -3.9144453 | 0.0000000 |
| N  | -0.4938616 | -4.7501576 | 0.0000000 |
| H  | -1.2458144 | -5.4235200 | 0.0000000 |
| N  | 2.0137589  | -0.8999044 | 0.0000000 |
| N  | -0.3061442 | -0.7590869 | 0.0000000 |
| N  | -1.7714125 | -2.6707606 | 0.0000000 |
| H  | 2.8378055  | -1.4773147 | 0.0000000 |
| H  | 2.0850685  | 0.1153004  | 0.0000000 |
| C  | -1.5761112 | 2.6311542  | 0.0000000 |
| C  | 0.8998236  | 2.6825071  | 0.0000000 |
| C  | 0.8201231  | 4.1406756  | 0.0000000 |
| C  | -0.3876559 | 4.7461966  | 0.0000000 |
| H  | -0.3176350 | 0.9955282  | 0.0000000 |
| H  | -0.4931134 | 5.8234427  | 0.0000000 |
| H  | -2.4446803 | 4.4711097  | 0.0000000 |
| N  | -0.3287600 | 2.0507157  | 0.0000000 |
| O  | 1.9486431  | 2.0466747  | 0.0000000 |
| O  | -2.6191993 | 2.0029011  | 0.0000000 |
| N  | -1.5434231 | 4.0158540  | 0.0000000 |
| Cl | 2.2747387  | 5.0392824  | 0.0000000 |
| H  | -2.3623741 | -0.6936686 | 0.0000000 |
| H  | 1.2353754  | -6.0159000 | 0.0000000 |

#### 4 (BrU...A)

|    |            |            |           |
|----|------------|------------|-----------|
| C  | 0.6678843  | -2.8983563 | 0.0000000 |
| C  | -0.6386500 | -3.3855280 | 0.0000000 |
| C  | -1.5119658 | -1.3684159 | 0.0000000 |
| C  | 0.8163813  | -1.4981209 | 0.0000000 |
| C  | 0.8493243  | -5.0075925 | 0.0000000 |
| N  | 1.5931293  | -3.9147996 | 0.0000000 |
| N  | -0.4937653 | -4.7502049 | 0.0000000 |
| H  | -1.2458803 | -5.4233840 | 0.0000000 |
| N  | 2.0140110  | -0.9000969 | 0.0000000 |
| N  | -0.3060383 | -0.7598436 | 0.0000000 |
| N  | -1.7713289 | -2.6710505 | 0.0000000 |
| H  | 2.8385947  | -1.4768126 | 0.0000000 |
| H  | 2.0833089  | 0.1154160  | 0.0000000 |
| C  | -1.5869239 | 2.6243040  | 0.0000000 |
| C  | 0.8889730  | 2.6761360  | 0.0000000 |
| C  | 0.8095076  | 4.1334572  | 0.0000000 |
| C  | -0.3985358 | 4.7394521  | 0.0000000 |
| H  | -0.3273598 | 0.9883048  | 0.0000000 |
| H  | -0.5075582 | 5.8164716  | 0.0000000 |
| H  | -2.4554967 | 4.4652331  | 0.0000000 |
| N  | -0.3400844 | 2.0441138  | 0.0000000 |
| O  | 1.9361148  | 2.0370962  | 0.0000000 |
| O  | -2.6304403 | 1.9968655  | 0.0000000 |
| N  | -1.5541026 | 4.0098606  | 0.0000000 |
| Br | 2.3982882  | 5.1174575  | 0.0000000 |
| H  | -2.3624163 | -0.6937171 | 0.0000000 |
| H  | 1.2350291  | -6.0162455 | 0.0000000 |

#### 5 (IU...A)

|   |            |            |           |
|---|------------|------------|-----------|
| C | 0.6679223  | -2.8990674 | 0.0000000 |
| C | -0.6386415 | -3.3863130 | 0.0000000 |
| C | -1.5123820 | -1.3696922 | 0.0000000 |
| C | 0.8162673  | -1.4989373 | 0.0000000 |
| C | 0.8494447  | -5.0082779 | 0.0000000 |
| N | 1.5931888  | -3.9154594 | 0.0000000 |
| N | -0.4936748 | -4.7509411 | 0.0000000 |
| H | -1.2459198 | -5.4238785 | 0.0000000 |
| N | 2.0135492  | -0.9003145 | 0.0000000 |
| N | -0.3065261 | -0.7612732 | 0.0000000 |
| N | -1.7715611 | -2.6722914 | 0.0000000 |
| H | 2.8384341  | -1.4765269 | 0.0000000 |
| H | 2.0809792  | 0.1154774  | 0.0000000 |
| C | -1.5992665 | 2.6161775  | 0.0000000 |
| C | 0.8751821  | 2.6725503  | 0.0000000 |

|   |            |            |           |
|---|------------|------------|-----------|
| C | 0.7995595  | 4.1295634  | 0.0000000 |
| C | -0.4118824 | 4.7318660  | 0.0000000 |
| H | -0.3363847 | 0.9809989  | 0.0000000 |
| H | -0.5294319 | 5.8082602  | 0.0000000 |
| H | -2.4688115 | 4.4575036  | 0.0000000 |
| N | -0.3524650 | 2.0374581  | 0.0000000 |
| O | 1.9217879  | 2.0308055  | 0.0000000 |
| O | -2.6430461 | 1.9890707  | 0.0000000 |
| N | -1.5669298 | 4.0023107  | 0.0000000 |
| I | 2.5481798  | 5.2026008  | 0.0000000 |
| H | -2.3627281 | -0.6947889 | 0.0000000 |
| H | 1.2351564  | -6.0168814 | 0.0000000 |

## 6 (U...FA)

|   |            |            |           |
|---|------------|------------|-----------|
| C | 0.6844385  | -2.8832493 | 0.0000000 |
| C | -0.6181403 | -3.3783654 | 0.0000000 |
| C | -1.5046639 | -1.3699125 | 0.0000000 |
| C | 0.8244580  | -1.4857371 | 0.0000000 |
| C | 0.8792889  | -4.9625813 | 0.0000000 |
| N | 1.6262432  | -3.8991231 | 0.0000000 |
| N | -0.4638024 | -4.7518852 | 0.0000000 |
| H | -1.1917787 | -5.4511479 | 0.0000000 |
| N | 2.0147467  | -0.8713357 | 0.0000000 |
| N | -0.3061012 | -0.7562689 | 0.0000000 |
| N | -1.7537883 | -2.6780989 | 0.0000000 |
| H | 2.8487728  | -1.4338735 | 0.0000000 |
| H | 2.0687064  | 0.1466756  | 0.0000000 |
| C | -1.5628571 | 2.6720146  | 0.0000000 |
| C | 0.9090457  | 2.7108406  | 0.0000000 |
| C | 0.8520950  | 4.1590820  | 0.0000000 |
| C | -0.3504269 | 4.7713364  | 0.0000000 |
| H | -0.3226365 | 1.0299201  | 0.0000000 |
| H | -0.4584137 | 5.8488002  | 0.0000000 |
| H | -2.4147750 | 4.5192556  | 0.0000000 |
| N | -0.3232820 | 2.0785720  | 0.0000000 |
| O | 1.9517569  | 2.0561471  | 0.0000000 |
| O | -2.6135681 | 2.0557901  | 0.0000000 |
| N | -1.5166611 | 4.0583961  | 0.0000000 |
| H | -2.3618389 | -0.7039335 | 0.0000000 |
| H | 1.7752573  | 4.7179431  | 0.0000000 |
| F | 1.3279247  | -6.1992613 | 0.0000000 |

## 7 (U...CIA)

|   |            |            |           |
|---|------------|------------|-----------|
| C | 0.6775648  | -2.8715688 | 0.0000000 |
| C | -0.6279444 | -3.3621630 | 0.0000000 |
| C | -1.5054951 | -1.3491579 | 0.0000000 |
| C | 0.8229714  | -1.4715607 | 0.0000000 |
| C | 0.8650954  | -4.9686858 | 0.0000000 |
| N | 1.6105767  | -3.8860817 | 0.0000000 |
| N | -0.4794408 | -4.7303803 | 0.0000000 |
| H | -1.2152216 | -5.4223797 | 0.0000000 |
| N | 2.0158205  | -0.8641823 | 0.0000000 |
| N | -0.3035957 | -0.7385930 | 0.0000000 |
| N | -1.7613011 | -2.6547686 | 0.0000000 |
| H | 2.8466557  | -1.4318134 | 0.0000000 |
| H | 2.0755825  | 0.1535081  | 0.0000000 |
| C | -1.5633293 | 2.6812856  | 0.0000000 |
| C | 0.9084855  | 2.7285525  | 0.0000000 |
| C | 0.8464165  | 4.1767491  | 0.0000000 |
| C | -0.3585517 | 4.7845092  | 0.0000000 |
| H | -0.3173876 | 1.0441036  | 0.0000000 |
| H | -0.4710154 | 5.8614051  | 0.0000000 |
| H | -2.4218905 | 4.5250433  | 0.0000000 |
| N | -0.3218379 | 2.0927422  | 0.0000000 |
| O | 1.9523512  | 2.0756720  | 0.0000000 |
| O | -2.6118377 | 2.0612520  | 0.0000000 |
| N | -1.5221896 | 4.0675966  | 0.0000000 |
| H | -2.3588377 | -0.6782285 | 0.0000000 |
| H | 1.7668086  | 4.7400332  | 0.0000000 |

|    |           |            |           |
|----|-----------|------------|-----------|
| Cl | 1.4515473 | -6.5628891 | 0.0000000 |
|----|-----------|------------|-----------|

### 8 (U...BrA)

|    |            |            |           |
|----|------------|------------|-----------|
| C  | 0.6754310  | -2.8575550 | 0.0000000 |
| C  | -0.6329981 | -3.3424697 | 0.0000000 |
| C  | -1.5047362 | -1.3276439 | 0.0000000 |
| C  | 0.8253208  | -1.4577132 | 0.0000000 |
| C  | 0.8527945  | -4.9575079 | 0.0000000 |
| N  | 1.6033569  | -3.8762442 | 0.0000000 |
| N  | -0.4903469 | -4.7107145 | 0.0000000 |
| H  | -1.2321887 | -5.3961002 | 0.0000000 |
| N  | 2.0169977  | -0.8489409 | 0.0000000 |
| N  | -0.2999895 | -0.7234239 | 0.0000000 |
| N  | -1.7649440 | -2.6319351 | 0.0000000 |
| H  | 2.8503219  | -1.4131401 | 0.0000000 |
| H  | 2.0726360  | 0.1696116  | 0.0000000 |
| C  | -1.5590184 | 2.6669817  | 0.0000000 |
| C  | 0.9116011  | 2.7256277  | 0.0000000 |
| C  | 0.8436595  | 4.1731663  | 0.0000000 |
| C  | -0.3643420 | 4.7752925  | 0.0000000 |
| H  | -0.3072426 | 1.0340416  | 0.0000000 |
| H  | -0.4818882 | 5.8516361  | 0.0000000 |
| H  | -2.4265317 | 4.5063658  | 0.0000000 |
| N  | -0.3151881 | 2.0845510  | 0.0000000 |
| O  | 1.9588440  | 2.0775180  | 0.0000000 |
| O  | -2.6046224 | 2.0415282  | 0.0000000 |
| N  | -1.5246383 | 4.0532147  | 0.0000000 |
| H  | -2.3544792 | -0.6517858 | 0.0000000 |
| H  | 1.7618631  | 4.7396751  | 0.0000000 |
| Br | 1.4903278  | -6.7040358 | 0.0000000 |

### 9 (U...IA)

|   |            |            |           |
|---|------------|------------|-----------|
| C | 0.6716386  | -2.8575366 | 0.0000000 |
| C | -0.6313500 | -3.3557186 | 0.0000000 |
| C | -1.5198557 | -1.3466460 | 0.0000000 |
| C | 0.8091464  | -1.4556536 | 0.0000000 |
| C | 0.8723524  | -4.9598022 | 0.0000000 |
| N | 1.6098611  | -3.8647634 | 0.0000000 |
| N | -0.4748655 | -4.7218663 | 0.0000000 |
| H | -1.2115981 | -5.4133392 | 0.0000000 |
| N | 1.9993956  | -0.8445467 | 0.0000000 |
| N | -0.3208973 | -0.7286658 | 0.0000000 |
| N | -1.7689962 | -2.6532098 | 0.0000000 |
| H | 2.8310230  | -1.4111820 | 0.0000000 |
| H | 2.0567292  | 0.1737341  | 0.0000000 |
| C | -1.5699288 | 2.6992755  | 0.0000000 |
| C | 0.9017833  | 2.7353568  | 0.0000000 |
| C | 0.8465288  | 4.1836284  | 0.0000000 |
| C | -0.3554385 | 4.7970935  | 0.0000000 |
| H | -0.3323886 | 1.0557651  | 0.0000000 |
| H | -0.4625567 | 5.8745773  | 0.0000000 |
| H | -2.4198235 | 4.5471142  | 0.0000000 |
| N | -0.3310449 | 2.1045923  | 0.0000000 |
| O | 1.9436779  | 2.0790880  | 0.0000000 |
| O | -2.6213920 | 2.0843995  | 0.0000000 |
| N | -1.5222283 | 4.0854899  | 0.0000000 |
| H | -2.3769513 | -0.6803451 | 0.0000000 |
| I | 1.6073007  | -6.8688603 | 0.0000000 |
| H | 1.7698784  | 4.7420209  | 0.0000000 |

### 10 (FU...FA)

|   |            |            |           |
|---|------------|------------|-----------|
| C | 0.6777779  | -2.8814177 | 0.0000000 |
| C | -0.6288977 | -3.3660214 | 0.0000000 |
| C | -1.4994061 | -1.3503796 | 0.0000000 |
| C | 0.8296699  | -1.4854200 | 0.0000000 |
| C | 0.8555173  | -4.9621167 | 0.0000000 |
| N | 1.6110173  | -3.9045795 | 0.0000000 |
| N | -0.4860069 | -4.7403871 | 0.0000000 |

|   |            |            |           |
|---|------------|------------|-----------|
| H | -1.2198874 | -5.4336469 | 0.0000000 |
| N | 2.0262449  | -0.8827602 | 0.0000000 |
| N | -0.2948389 | -0.7467360 | 0.0000000 |
| N | -1.7584280 | -2.6559564 | 0.0000000 |
| H | 2.8552628  | -1.4528820 | 0.0000000 |
| H | 2.0915718  | 0.1329992  | 0.0000000 |
| C | -1.5727039 | 2.6513584  | 0.0000000 |
| C | 0.9057068  | 2.6904750  | 0.0000000 |
| C | 0.8166408  | 4.1420276  | 0.0000000 |
| C | -0.3766123 | 4.7640225  | 0.0000000 |
| H | -0.3161986 | 1.0122029  | 0.0000000 |
| H | -0.4631598 | 5.8423121  | 0.0000000 |
| H | -2.4375533 | 4.4903278  | 0.0000000 |
| N | -0.3240938 | 2.0654076  | 0.0000000 |
| O | 1.9608949  | 2.0637891  | 0.0000000 |
| O | -2.6139571 | 2.0189630  | 0.0000000 |
| N | -1.5381618 | 4.0327126  | 0.0000000 |
| H | -2.3502231 | -0.6764284 | 0.0000000 |
| F | 1.2942015  | -6.2018453 | 0.0000000 |
| F | 1.9556226  | 4.8339792  | 0.0000000 |

## 11 (CIU...CIA)

|    |            |            |           |
|----|------------|------------|-----------|
| C  | 0.6604702  | -2.8781309 | 0.0000000 |
| C  | -0.6470932 | -3.3633198 | 0.0000000 |
| C  | -1.5174353 | -1.3467969 | 0.0000000 |
| C  | 0.8115774  | -1.4790194 | 0.0000000 |
| C  | 0.8393983  | -4.9757432 | 0.0000000 |
| N  | 1.5893648  | -3.8959131 | 0.0000000 |
| N  | -0.5043827 | -4.7318247 | 0.0000000 |
| H  | -1.2438009 | -5.4201020 | 0.0000000 |
| N  | 2.0074621  | -0.8777140 | 0.0000000 |
| N  | -0.3122271 | -0.7411748 | 0.0000000 |
| N  | -1.7775843 | -2.6510202 | 0.0000000 |
| H  | 2.8362687  | -1.4483644 | 0.0000000 |
| H  | 2.0719294  | 0.1384985  | 0.0000000 |
| C  | -1.5877010 | 2.6575402  | 0.0000000 |
| C  | 0.8893635  | 2.7011221  | 0.0000000 |
| C  | 0.8146465  | 4.1591125  | 0.0000000 |
| C  | -0.3914594 | 4.7681452  | 0.0000000 |
| H  | -0.3321019 | 1.0208590  | 0.0000000 |
| H  | -0.4929179 | 5.8457576  | 0.0000000 |
| H  | -2.4490558 | 4.5012022  | 0.0000000 |
| N  | -0.3416148 | 2.0740071  | 0.0000000 |
| O  | 1.9353552  | 2.0607336  | 0.0000000 |
| O  | -2.6318979 | 2.0311958  | 0.0000000 |
| N  | -1.5498823 | 4.0418424  | 0.0000000 |
| H  | -2.3681504 | -0.6724091 | 0.0000000 |
| Cl | 2.2717748  | 5.0531249  | 0.0000000 |
| Cl | 1.4196939  | -6.5716085 | 0.0000000 |

## 12 (BrU...BrA)

|   |            |            |           |
|---|------------|------------|-----------|
| C | 0.6533886  | -2.8752807 | 0.0000000 |
| C | -0.6543939 | -3.3603768 | 0.0000000 |
| C | -1.5243995 | -1.3437333 | 0.0000000 |
| C | 0.8047483  | -1.4756300 | 0.0000000 |
| C | 0.8318841  | -4.9745655 | 0.0000000 |
| N | 1.5820643  | -3.8929428 | 0.0000000 |
| N | -0.5119215 | -4.7286961 | 0.0000000 |
| H | -1.2528659 | -5.4155509 | 0.0000000 |
| N | 2.0006544  | -0.8750963 | 0.0000000 |
| N | -0.3189521 | -0.7379739 | 0.0000000 |
| N | -1.7849578 | -2.6476707 | 0.0000000 |
| H | 2.8289282  | -1.4465976 | 0.0000000 |
| H | 2.0655890  | 0.1411849  | 0.0000000 |
| C | -1.5942186 | 2.6594619  | 0.0000000 |
| C | 0.8829379  | 2.7035591  | 0.0000000 |
| C | 0.8083938  | 4.1608098  | 0.0000000 |
| C | -0.3980058 | 4.7701851  | 0.0000000 |
| H | -0.3391846 | 1.0225909  | 0.0000000 |

|    |            |            |           |
|----|------------|------------|-----------|
| H  | -0.5038909 | 5.8474952  | 0.0000000 |
| H  | -2.4554990 | 4.5040419  | 0.0000000 |
| N  | -0.3486461 | 2.0759870  | 0.0000000 |
| O  | 1.9272006  | 2.0598796  | 0.0000000 |
| O  | -2.6388577 | 2.0341474  | 0.0000000 |
| N  | -1.5561592 | 4.0445761  | 0.0000000 |
| H  | -2.3748747 | -0.6690919 | 0.0000000 |
| Br | 2.3999770  | 5.1398476  | 0.0000000 |
| Br | 1.4710608  | -6.7205598 | 0.0000000 |

### 13 (IU...IA)

|   |            |            |           |
|---|------------|------------|-----------|
| C | 0.6439382  | -2.8725454 | 0.0000000 |
| C | -0.6641176 | -3.3576166 | 0.0000000 |
| C | -1.5329909 | -1.3399775 | 0.0000000 |
| C | 0.7958016  | -1.4723240 | 0.0000000 |
| C | 0.8229143  | -4.9768639 | 0.0000000 |
| N | 1.5715223  | -3.8891937 | 0.0000000 |
| N | -0.5218347 | -4.7248766 | 0.0000000 |
| H | -1.2663707 | -5.4080640 | 0.0000000 |
| N | 1.9921883  | -0.8728424 | 0.0000000 |
| N | -0.3271434 | -0.7341607 | 0.0000000 |
| N | -1.7945471 | -2.6435225 | 0.0000000 |
| H | 2.8195266  | -1.4458014 | 0.0000000 |
| H | 2.0577759  | 0.1435915  | 0.0000000 |
| C | -1.6015753 | 2.6621178  | 0.0000000 |
| C | 0.8738775  | 2.7091825  | 0.0000000 |
| C | 0.8034533  | 4.1662587  | 0.0000000 |
| C | -0.4058830 | 4.7729033  | 0.0000000 |
| H | -0.3463229 | 1.0255055  | 0.0000000 |
| H | -0.5184332 | 5.8498876  | 0.0000000 |
| H | -2.4639612 | 4.5064688  | 0.0000000 |
| N | -0.3564281 | 2.0791166  | 0.0000000 |
| O | 1.9172663  | 2.0623359  | 0.0000000 |
| O | -2.6464410 | 2.0371642  | 0.0000000 |
| N | -1.5639006 | 4.0477512  | 0.0000000 |
| H | -2.3829628 | -0.6647253 | 0.0000000 |
| I | 2.5561227  | 5.2330271  | 0.0000000 |
| I | 1.5385255  | -6.8927968 | 0.0000000 |

### Binding mode b

#### 14 (U...A)

|   |            |            |           |
|---|------------|------------|-----------|
| C | 0.2735084  | -2.0496666 | 0.0000000 |
| C | -0.4460925 | -3.2445133 | 0.0000000 |
| C | 1.3836141  | -4.4569892 | 0.0000000 |
| C | 1.6797362  | -2.1605690 | 0.0000000 |
| C | -1.7916372 | -1.4965618 | 0.0000000 |
| N | -0.5769901 | -0.9693462 | 0.0000000 |
| N | -1.7666659 | -2.8571938 | 0.0000000 |
| H | -2.5620727 | -3.4785731 | 0.0000000 |
| N | 2.4982011  | -1.0982186 | 0.0000000 |
| N | 2.2059572  | -3.3940757 | 0.0000000 |
| N | 0.0497981  | -4.4846408 | 0.0000000 |
| H | 2.1584739  | -0.1406686 | 0.0000000 |
| H | 3.4886989  | -1.2790300 | 0.0000000 |
| C | -1.6963073 | 2.3931779  | 0.0000000 |
| C | 0.7756076  | 2.4522812  | 0.0000000 |
| C | 0.7058160  | 3.9006243  | 0.0000000 |
| C | -0.5026537 | 4.5011751  | 0.0000000 |
| H | -0.4460030 | 0.7659592  | 0.0000000 |
| H | -0.6207865 | 5.5775103  | 0.0000000 |
| H | -2.5657462 | 4.2318240  | 0.0000000 |
| N | -0.4536903 | 1.8139592  | 0.0000000 |
| O | 1.8180694  | 1.7996325  | 0.0000000 |
| O | -2.7424973 | 1.7642625  | 0.0000000 |
| N | -1.6642306 | 3.7780905  | 0.0000000 |
| H | 1.8778568  | -5.4230274 | 0.0000000 |
| H | -2.7026680 | -0.9151779 | 0.0000000 |
| H | 1.6227034  | 4.4697551  | 0.0000000 |



### 15 (FU...A)

|   |            |            |           |
|---|------------|------------|-----------|
| C | 0.2580269  | -2.0521217 | 0.0000000 |
| C | -0.4648108 | -3.2451802 | 0.0000000 |
| C | 1.3610541  | -4.4637312 | 0.0000000 |
| C | 1.6638514  | -2.1685858 | 0.0000000 |
| C | -1.8064953 | -1.4940310 | 0.0000000 |
| N | -0.5902212 | -0.9691202 | 0.0000000 |
| N | -1.7843589 | -2.8542327 | 0.0000000 |
| H | -2.5812220 | -3.4739528 | 0.0000000 |
| N | 2.4867844  | -1.1095104 | 0.0000000 |
| N | 2.1861539  | -3.4031494 | 0.0000000 |
| N | 0.0271427  | -4.4866473 | 0.0000000 |
| H | 2.1514335  | -0.1519540 | 0.0000000 |
| H | 3.4768833  | -1.2927774 | 0.0000000 |
| C | -1.6977760 | 2.3946855  | 0.0000000 |
| C | 0.7808213  | 2.4309405  | 0.0000000 |
| C | 0.6921327  | 3.8830079  | 0.0000000 |
| C | -0.5011934 | 4.5049949  | 0.0000000 |
| H | -0.4497081 | 0.7581194  | 0.0000000 |
| H | -0.5869021 | 5.5832366  | 0.0000000 |
| H | -2.5629409 | 4.2338760  | 0.0000000 |
| N | -0.4514879 | 1.8098573  | 0.0000000 |
| O | 1.8311359  | 1.7987881  | 0.0000000 |
| O | -2.7403370 | 1.7598234  | 0.0000000 |
| N | -1.6644972 | 3.7745352  | 0.0000000 |
| F | 1.8302927  | 4.5755217  | 0.0000000 |
| H | 1.8530250  | -5.4308989 | 0.0000000 |
| H | -2.7167869 | -0.9114937 | 0.0000000 |

### 16 (CIU...A)

|    |            |            |           |
|----|------------|------------|-----------|
| C  | 0.2538943  | -2.0600963 | 0.0000000 |
| C  | -0.4658554 | -3.2549770 | 0.0000000 |
| C  | 1.3629759  | -4.4690469 | 0.0000000 |
| C  | 1.6600587  | -2.1729991 | 0.0000000 |
| C  | -1.8120373 | -1.5075391 | 0.0000000 |
| N  | -0.5972150 | -0.9792015 | 0.0000000 |
| N  | -1.7863788 | -2.8677066 | 0.0000000 |
| H  | -2.5815871 | -3.4896187 | 0.0000000 |
| N  | 2.4799452  | -1.1117119 | 0.0000000 |
| N  | 2.1854748  | -3.4064312 | 0.0000000 |
| N  | 0.0291930  | -4.4953160 | 0.0000000 |
| H  | 2.1407925  | -0.1552469 | 0.0000000 |
| H  | 3.4705463  | -1.2918526 | 0.0000000 |
| C  | -1.7178972 | 2.3812268  | 0.0000000 |
| C  | 0.7589448  | 2.4296506  | 0.0000000 |
| C  | 0.6799231  | 3.8878965  | 0.0000000 |
| C  | -0.5279717 | 4.4934989  | 0.0000000 |
| H  | -0.4648448 | 0.7512045  | 0.0000000 |
| H  | -0.6320242 | 5.5708861  | 0.0000000 |
| H  | -2.5859707 | 4.2218837  | 0.0000000 |
| N  | -0.4724469 | 1.8026985  | 0.0000000 |
| O  | 1.8021916  | 1.7874493  | 0.0000000 |
| O  | -2.7610570 | 1.7484521  | 0.0000000 |
| N  | -1.6860220 | 3.7641456  | 0.0000000 |
| Cl | 2.1342608  | 4.7856540  | 0.0000000 |
| H  | 1.8570543  | -5.4351962 | 0.0000000 |
| H  | -2.7239474 | -0.9277064 | 0.0000000 |

### 17 (BrU...A)

|   |            |            |           |
|---|------------|------------|-----------|
| C | 0.2538798  | -2.0605227 | 0.0000000 |
| C | -0.4658843 | -3.2554239 | 0.0000000 |
| C | 1.3630138  | -4.4692512 | 0.0000000 |
| C | 1.6601489  | -2.1731836 | 0.0000000 |
| C | -1.8124316 | -1.5082854 | 0.0000000 |
| N | -0.5976277 | -0.9800903 | 0.0000000 |
| N | -1.7865344 | -2.8683153 | 0.0000000 |
| H | -2.5818129 | -3.4900854 | 0.0000000 |

|    |            |            |           |
|----|------------|------------|-----------|
| N  | 2.4799058  | -1.1118669 | 0.0000000 |
| N  | 2.1855194  | -3.4066622 | 0.0000000 |
| N  | 0.0292306  | -4.4956932 | 0.0000000 |
| H  | 2.1401302  | -0.1554905 | 0.0000000 |
| H  | 3.4705265  | -1.2919705 | 0.0000000 |
| C  | -1.7283316 | 2.3742310  | 0.0000000 |
| C  | 0.7481473  | 2.4240016  | 0.0000000 |
| C  | 0.6691991  | 3.8814983  | 0.0000000 |
| C  | -0.5390755 | 4.4871017  | 0.0000000 |
| H  | -0.4742392 | 0.7445499  | 0.0000000 |
| H  | -0.6462077 | 5.5642937  | 0.0000000 |
| H  | -2.5971805 | 4.2149707  | 0.0000000 |
| N  | -0.4833176 | 1.7965848  | 0.0000000 |
| O  | 1.7899566  | 1.7791011  | 0.0000000 |
| O  | -2.7716615 | 1.7417867  | 0.0000000 |
| N  | -1.6967769 | 3.7578953  | 0.0000000 |
| Br | 2.2583190  | 4.8640625  | 0.0000000 |
| H  | 1.8571000  | -5.4353726 | 0.0000000 |
| H  | -2.7239957 | -0.9278635 | 0.0000000 |

### 18 (IU...A)

|   |            |            |           |
|---|------------|------------|-----------|
| C | 0.2499153  | -2.0665679 | 0.0000000 |
| C | -0.4676395 | -3.2627458 | 0.0000000 |
| C | 1.3636245  | -4.4732199 | 0.0000000 |
| C | 1.6562242  | -2.1766863 | 0.0000000 |
| C | -1.8168780 | -1.5175683 | 0.0000000 |
| N | -0.6029772 | -0.9871571 | 0.0000000 |
| N | -1.7888717 | -2.8777231 | 0.0000000 |
| H | -2.5830243 | -3.5008810 | 0.0000000 |
| N | 2.4731371  | -1.1130730 | 0.0000000 |
| N | 2.1841650  | -3.4089955 | 0.0000000 |
| N | 0.0298370  | -4.5021286 | 0.0000000 |
| H | 2.1303791  | -0.1578003 | 0.0000000 |
| H | 3.4642882  | -1.2899653 | 0.0000000 |
| C | -1.7343602 | 2.3683668  | 0.0000000 |
| C | 0.7409141  | 2.4297220  | 0.0000000 |
| C | 0.6610913  | 3.8868737  | 0.0000000 |
| C | -0.5522747 | 4.4853376  | 0.0000000 |
| H | -0.4751801 | 0.7435251  | 0.0000000 |
| H | -0.6724258 | 5.5615217  | 0.0000000 |
| H | -2.6094692 | 4.2065733  | 0.0000000 |
| N | -0.4876590 | 1.7951073  | 0.0000000 |
| O | 1.7836133  | 1.7845345  | 0.0000000 |
| O | -2.7760877 | 1.7334888  | 0.0000000 |
| N | -1.7071680 | 3.7526191  | 0.0000000 |
| I | 2.4069465  | 4.9643858  | 0.0000000 |
| H | 1.8596499  | -5.4383565 | 0.0000000 |
| H | -2.7297700 | -0.9391872 | 0.0000000 |

### 19 (U...FA)

|   |            |            |           |
|---|------------|------------|-----------|
| C | 0.2452660  | -2.1217692 | 0.0000000 |
| C | -0.4005119 | -3.3579012 | 0.0000000 |
| C | 1.4880228  | -4.4705009 | 0.0000000 |
| C | 1.6529647  | -2.1585644 | 0.0000000 |
| C | -1.8181089 | -1.6992281 | 0.0000000 |
| N | -0.6726536 | -1.0758520 | 0.0000000 |
| N | -1.7500282 | -3.0513119 | 0.0000000 |
| H | -2.5248131 | -3.6984367 | 0.0000000 |
| N | 2.4233786  | -1.0623687 | 0.0000000 |
| N | 2.2449477  | -3.3655867 | 0.0000000 |
| N | 0.1552877  | -4.5673293 | 0.0000000 |
| H | 2.0465931  | -0.1183934 | 0.0000000 |
| H | 3.4202424  | -1.2034628 | 0.0000000 |
| C | -1.7322935 | 2.5639692  | 0.0000000 |
| C | 0.7421340  | 2.4506469  | 0.0000000 |
| C | 0.7735978  | 3.8988229  | 0.0000000 |
| C | -0.3878997 | 4.5844535  | 0.0000000 |
| H | -0.5866907 | 0.8611880  | 0.0000000 |
| H | -0.4291804 | 5.6663302  | 0.0000000 |

|   |            |            |           |
|---|------------|------------|-----------|
| H | -2.4629458 | 4.4595445  | 0.0000000 |
| N | -0.5278930 | 1.8933064  | 0.0000000 |
| O | 1.7419141  | 1.7360006  | 0.0000000 |
| O | -2.8180340 | 2.0179888  | 0.0000000 |
| N | -1.5950234 | 3.9444956  | 0.0000000 |
| H | 2.0330481  | -5.4086961 | 0.0000000 |
| H | 1.7300814  | 4.3979192  | 0.0000000 |
| F | -2.9914020 | -1.1152646 | 0.0000000 |

## 20 (U...CIA)

|    |            |            |           |
|----|------------|------------|-----------|
| C  | 0.2547932  | -2.1563484 | 0.0000000 |
| C  | -0.3632929 | -3.4088742 | 0.0000000 |
| C  | 1.5482019  | -4.4828635 | 0.0000000 |
| C  | 1.6666411  | -2.1680762 | 0.0000000 |
| C  | -1.8341006 | -1.7797952 | 0.0000000 |
| N  | -0.6821455 | -1.1352048 | 0.0000000 |
| N  | -1.7118708 | -3.1341290 | 0.0000000 |
| H  | -2.4672908 | -3.8045328 | 0.0000000 |
| N  | 2.4150838  | -1.0585352 | 0.0000000 |
| N  | 2.2826983  | -3.3617359 | 0.0000000 |
| N  | 0.2193793  | -4.6078906 | 0.0000000 |
| H  | 2.0185304  | -0.1229007 | 0.0000000 |
| H  | 3.4144870  | -1.1811076 | 0.0000000 |
| C  | -1.7496780 | 2.6382392  | 0.0000000 |
| C  | 0.7191973  | 2.4448420  | 0.0000000 |
| C  | 0.7977572  | 3.8910812  | 0.0000000 |
| C  | -0.3395295 | 4.6150693  | 0.0000000 |
| H  | -0.6519060 | 0.8951836  | 0.0000000 |
| H  | -0.3457033 | 5.6977934  | 0.0000000 |
| H  | -2.4172620 | 4.5548922  | 0.0000000 |
| N  | -0.5684156 | 1.9245917  | 0.0000000 |
| O  | 1.6978131  | 1.7028744  | 0.0000000 |
| O  | -2.8556207 | 2.1351536  | 0.0000000 |
| N  | -1.5656222 | 4.0131176  | 0.0000000 |
| H  | 2.1134409  | -5.4092510 | 0.0000000 |
| H  | 1.7707986  | 4.3570828  | 0.0000000 |
| Cl | -3.3663842 | -1.0586758 | 0.0000000 |

## 21 (U...BrA)

|    |            |            |           |
|----|------------|------------|-----------|
| C  | 0.2536247  | -2.1738646 | 0.0000000 |
| C  | -0.3493398 | -3.4343694 | 0.0000000 |
| C  | 1.5738480  | -4.4872296 | 0.0000000 |
| C  | 1.6664582  | -2.1711022 | 0.0000000 |
| C  | -1.8411618 | -1.8233721 | 0.0000000 |
| N  | -0.6956792 | -1.1635042 | 0.0000000 |
| N  | -1.7002967 | -3.1762590 | 0.0000000 |
| H  | -2.4464335 | -3.8571911 | 0.0000000 |
| N  | 2.4041843  | -1.0548319 | 0.0000000 |
| N  | 2.2954704  | -3.3577478 | 0.0000000 |
| N  | 0.2469129  | -4.6271255 | 0.0000000 |
| H  | 1.9994151  | -0.1230331 | 0.0000000 |
| H  | 3.4047516  | -1.1678501 | 0.0000000 |
| C  | -1.7500123 | 2.6716018  | 0.0000000 |
| C  | 0.7164823  | 2.4490490  | 0.0000000 |
| C  | 0.8116269  | 3.8942030  | 0.0000000 |
| C  | -0.3166844 | 4.6317910  | 0.0000000 |
| H  | -0.6726302 | 0.9156233  | 0.0000000 |
| H  | -0.3103541 | 5.7144736  | 0.0000000 |
| H  | -2.3949499 | 4.5953589  | 0.0000000 |
| N  | -0.5773890 | 1.9429334  | 0.0000000 |
| O  | 1.6869111  | 1.6970586  | 0.0000000 |
| O  | -2.8622225 | 2.1828048  | 0.0000000 |
| N  | -1.5494997 | 4.0438994  | 0.0000000 |
| H  | 2.1498233  | -5.4069931 | 0.0000000 |
| H  | 1.7905133  | 4.3477317  | 0.0000000 |
| Br | -3.5333691 | -1.0620549 | 0.0000000 |

## 22 (U...IA)

|   |            |            |           |
|---|------------|------------|-----------|
| C | 0.2464153  | -2.1883196 | 0.0000000 |
| C | -0.3493365 | -3.4531130 | 0.0000000 |
| C | 1.5782061  | -4.4980385 | 0.0000000 |
| C | 1.6604242  | -2.1811405 | 0.0000000 |
| C | -1.8559456 | -1.8501568 | 0.0000000 |
| N | -0.7088689 | -1.1840866 | 0.0000000 |
| N | -1.6996808 | -3.2034271 | 0.0000000 |
| H | -2.4389767 | -3.8919833 | 0.0000000 |
| N | 2.3966256  | -1.0634570 | 0.0000000 |
| N | 2.2944664  | -3.3648771 | 0.0000000 |
| N | 0.2524699  | -4.6436075 | 0.0000000 |
| H | 1.9925843  | -0.1319186 | 0.0000000 |
| H | 3.3972787  | -1.1768696 | 0.0000000 |
| C | -1.7330451 | 2.6978961  | 0.0000000 |
| C | 0.7306994  | 2.4575700  | 0.0000000 |
| C | 0.8353691  | 3.9024407  | 0.0000000 |
| C | -0.2874269 | 4.6484318  | 0.0000000 |
| H | -0.6694891 | 0.9330376  | 0.0000000 |
| H | -0.2754843 | 5.7310465  | 0.0000000 |
| H | -2.3663794 | 4.6244239  | 0.0000000 |
| N | -0.5668663 | 1.9594219  | 0.0000000 |
| O | 1.6956417  | 1.6991585  | 0.0000000 |
| O | -2.8491921 | 2.2176572  | 0.0000000 |
| N | -1.5238775 | 4.0681885  | 0.0000000 |
| H | 2.1582829  | -5.4153091 | 0.0000000 |
| I | -3.7317790 | -1.0409461 | 0.0000000 |
| H | 1.8178846  | 4.3479776  | 0.0000000 |

### 23 (FU...FA)

|   |            |            |           |
|---|------------|------------|-----------|
| C | 0.2442675  | -2.1193721 | 0.0000000 |
| C | -0.4084053 | -3.3520375 | 0.0000000 |
| C | 1.4733290  | -4.4759111 | 0.0000000 |
| C | 1.6516903  | -2.1651661 | 0.0000000 |
| C | -1.8179693 | -1.6867635 | 0.0000000 |
| N | -0.6690313 | -1.0687605 | 0.0000000 |
| N | -1.7562882 | -3.0385642 | 0.0000000 |
| H | -2.5343233 | -3.6819278 | 0.0000000 |
| N | 2.4305606  | -1.0744746 | 0.0000000 |
| N | 2.2363264  | -3.3753320 | 0.0000000 |
| N | 0.1401297  | -4.5644246 | 0.0000000 |
| H | 2.0601634  | -0.1296895 | 0.0000000 |
| H | 3.4265851  | -1.2213555 | 0.0000000 |
| C | -1.7486648 | 2.5560298  | 0.0000000 |
| C | 0.7321963  | 2.4297138  | 0.0000000 |
| C | 0.7394332  | 3.8835814  | 0.0000000 |
| C | -0.4084159 | 4.5844559  | 0.0000000 |
| H | -0.5957629 | 0.8505897  | 0.0000000 |
| H | -0.4231786 | 5.6661111  | 0.0000000 |
| H | -2.4823906 | 4.4483095  | 0.0000000 |
| N | -0.5378023 | 1.8851697  | 0.0000000 |
| O | 1.7437032  | 1.7387930  | 0.0000000 |
| O | -2.8287717 | 1.9991619  | 0.0000000 |
| N | -1.6155440 | 3.9317340  | 0.0000000 |
| H | 2.0125777  | -5.4173292 | 0.0000000 |
| F | -2.9877948 | -1.0967953 | 0.0000000 |
| F | 1.9233806  | 4.4942538  | 0.0000000 |

### 24 (CIU...CIA)

|   |            |            |           |
|---|------------|------------|-----------|
| C | 0.2344697  | -2.1623753 | 0.0000000 |
| C | -0.3915524 | -3.4111374 | 0.0000000 |
| C | 1.5120700  | -4.4985731 | 0.0000000 |
| C | 1.6464617  | -2.1848059 | 0.0000000 |
| C | -1.8532975 | -1.7742438 | 0.0000000 |
| N | -0.6974081 | -1.1356517 | 0.0000000 |
| N | -1.7383253 | -3.1286713 | 0.0000000 |
| H | -2.4972932 | -3.7951441 | 0.0000000 |
| N | 2.4044470  | -1.0814706 | 0.0000000 |
| N | 2.2538807  | -3.3824382 | 0.0000000 |
| N | 0.1825270  | -4.6140127 | 0.0000000 |

|    |            |            |           |
|----|------------|------------|-----------|
| H  | 2.0142533  | -0.1447323 | 0.0000000 |
| H  | 3.4030594  | -1.2105188 | 0.0000000 |
| C  | -1.7719732 | 2.6298349  | 0.0000000 |
| C  | 0.7012903  | 2.4202944  | 0.0000000 |
| C  | 0.7757117  | 3.8775936  | 0.0000000 |
| C  | -0.3595338 | 4.6079381  | 0.0000000 |
| H  | -0.6722915 | 0.8836066  | 0.0000000 |
| H  | -0.3508369 | 5.6902541  | 0.0000000 |
| H  | -2.4326286 | 4.5495576  | 0.0000000 |
| N  | -0.5888684 | 1.9149629  | 0.0000000 |
| O  | 1.6789226  | 1.6850087  | 0.0000000 |
| O  | -2.8766768 | 2.1256246  | 0.0000000 |
| N  | -1.5842937 | 4.0018661  | 0.0000000 |
| H  | 2.0710700  | -5.4286042 | 0.0000000 |
| Cl | 2.3186439  | 4.6116083  | 0.0000000 |
| Cl | -3.3818280 | -1.0457704 | 0.0000000 |

## 25 (BrU...BrA)

|    |            |            |           |
|----|------------|------------|-----------|
| C  | 0.2272332  | -2.1837084 | 0.0000000 |
| C  | -0.3844664 | -3.4401610 | 0.0000000 |
| C  | 1.5303263  | -4.5077742 | 0.0000000 |
| C  | 1.6402386  | -2.1925583 | 0.0000000 |
| C  | -1.8661518 | -1.8201800 | 0.0000000 |
| N  | -0.7162619 | -1.1669605 | 0.0000000 |
| N  | -1.7334893 | -3.1733864 | 0.0000000 |
| H  | -2.4837952 | -3.8498144 | 0.0000000 |
| N  | 2.3880898  | -1.0827355 | 0.0000000 |
| N  | 2.2600686  | -3.3836460 | 0.0000000 |
| N  | 0.2024955  | -4.6372162 | 0.0000000 |
| H  | 1.9901194  | -0.1495803 | 0.0000000 |
| H  | 3.3877873  | -1.2032044 | 0.0000000 |
| C  | -1.7761771 | 2.6630415  | 0.0000000 |
| C  | 0.6949319  | 2.4243554  | 0.0000000 |
| C  | 0.7866146  | 3.8800238  | 0.0000000 |
| C  | -0.3399653 | 4.6242389  | 0.0000000 |
| H  | -0.6973486 | 0.9039311  | 0.0000000 |
| H  | -0.3230687 | 5.7066069  | 0.0000000 |
| H  | -2.4133949 | 4.5908118  | 0.0000000 |
| N  | -0.6023060 | 1.9331133  | 0.0000000 |
| O  | 1.6615227  | 1.6748797  | 0.0000000 |
| O  | -2.8877219 | 2.1746593  | 0.0000000 |
| N  | -1.5713106 | 4.0331965  | 0.0000000 |
| H  | 2.0991503  | -5.4318678 | 0.0000000 |
| Br | 2.4814073  | 4.6650233  | 0.0000000 |
| Br | -3.5545279 | -1.0510882 | 0.0000000 |

## 26 (IU...IA)

|   |            |            |           |
|---|------------|------------|-----------|
| C | 0.2137805  | -2.2015291 | 0.0000000 |
| C | -0.3828474 | -3.4658471 | 0.0000000 |
| C | 1.5434985  | -4.5131680 | 0.0000000 |
| C | 1.6278795  | -2.1967919 | 0.0000000 |
| C | -1.8888824 | -1.8623554 | 0.0000000 |
| N | -0.7412449 | -1.1962775 | 0.0000000 |
| N | -1.7329805 | -3.2154541 | 0.0000000 |
| H | -2.4722391 | -3.9041968 | 0.0000000 |
| N | 2.3659147  | -1.0805443 | 0.0000000 |
| N | 2.2606775  | -3.3807758 | 0.0000000 |
| N | 0.2176291  | -4.6568699 | 0.0000000 |
| H | 1.9619538  | -0.1502750 | 0.0000000 |
| H | 3.3665534  | -1.1932379 | 0.0000000 |
| C | -1.7688006 | 2.6837438  | 0.0000000 |
| C | 0.6993929  | 2.4336928  | 0.0000000 |
| C | 0.8038442  | 3.8880660  | 0.0000000 |
| C | -0.3214983 | 4.6363335  | 0.0000000 |
| H | -0.7023029 | 0.9186051  | 0.0000000 |
| H | -0.3058680 | 5.7190247  | 0.0000000 |
| H | -2.3954291 | 4.6145006  | 0.0000000 |
| N | -0.6002686 | 1.9465870  | 0.0000000 |
| O | 1.6600473  | 1.6757297  | 0.0000000 |

|   |            |            |           |
|---|------------|------------|-----------|
| O | -2.8837342 | 2.2026459  | 0.0000000 |
| N | -1.5559411 | 4.0525504  | 0.0000000 |
| H | 2.1225979  | -5.4309528 | 0.0000000 |
| I | 2.6735373  | 4.7312867  | 0.0000000 |
| I | -3.7652698 | -1.0544908 | 0.0000000 |

## Binding mode c 27 (U...A)

|   |            |            |           |
|---|------------|------------|-----------|
| C | 0.5619323  | -3.0936289 | 0.0000000 |
| C | -0.6830581 | -3.7209660 | 0.0000000 |
| C | -1.7554839 | -1.8050494 | 0.0000000 |
| C | 0.5568381  | -1.6840451 | 0.0000000 |
| C | 0.9723262  | -5.1720511 | 0.0000000 |
| N | 1.5924328  | -4.0049040 | 0.0000000 |
| N | -0.3909681 | -5.0629320 | 0.0000000 |
| H | -1.0643513 | -5.8145946 | 0.0000000 |
| N | 1.6927343  | -0.9731903 | 0.0000000 |
| N | -0.6328449 | -1.0609441 | 0.0000000 |
| N | -1.8841677 | -3.1304747 | 0.0000000 |
| H | 2.5670725  | -1.4714287 | 0.0000000 |
| H | 1.6837724  | 0.0436526  | 0.0000000 |
| C | 0.1117298  | 5.0965719  | 0.0000000 |
| C | 0.8801278  | 2.7223367  | 0.0000000 |
| C | -0.5068173 | 2.3101771  | 0.0000000 |
| C | -1.4684524 | 3.2563700  | 0.0000000 |
| H | 2.0326400  | 4.4267273  | 0.0000000 |
| H | -2.5234187 | 3.0122409  | 0.0000000 |
| H | -1.9065852 | 5.2917710  | 0.0000000 |
| N | 1.0716311  | 4.1030211  | 0.0000000 |
| O | 1.8529006  | 1.9739441  | 0.0000000 |
| O | 0.3677773  | 6.2843751  | 0.0000000 |
| N | -1.1755281 | 4.5958006  | 0.0000000 |
| H | -2.6830345 | -1.2403332 | 0.0000000 |
| H | 1.4657847  | -6.1326934 | 0.0000000 |
| H | -0.7349898 | 1.2502468  | 0.0000000 |

## 28 (FU...A)

|   |            |            |           |
|---|------------|------------|-----------|
| C | 0.5298309  | -3.3702799 | 0.0000000 |
| C | -0.5068976 | -4.3027991 | 0.0000000 |
| C | -2.0448639 | -2.7339777 | 0.0000000 |
| C | 0.1491757  | -2.0134918 | 0.0000000 |
| C | 1.4722684  | -5.2685348 | 0.0000000 |
| N | 1.7643760  | -3.9794973 | 0.0000000 |
| N | 0.1284251  | -5.5215119 | 0.0000000 |
| H | -0.3237112 | -6.4236122 | 0.0000000 |
| N | 1.0583842  | -1.0255888 | 0.0000000 |
| N | -1.1582160 | -1.7220115 | 0.0000000 |
| N | -1.8200193 | -4.0487347 | 0.0000000 |
| H | 2.0357487  | -1.2625345 | 0.0000000 |
| H | 0.7817313  | -0.0539183 | 0.0000000 |
| C | 0.5553915  | 5.4806339  | 0.0000000 |
| C | 0.6726265  | 2.9791268  | 0.0000000 |
| C | -0.7814243 | 2.9868052  | 0.0000000 |
| C | -1.4724584 | 4.1407943  | 0.0000000 |
| H | 2.2267583  | 4.3156626  | 0.0000000 |
| H | -2.5538170 | 4.1609479  | 0.0000000 |
| H | -1.3343064 | 6.2153769  | 0.0000000 |
| N | 1.2138032  | 4.2591796  | 0.0000000 |
| O | 1.3733185  | 1.9801243  | 0.0000000 |
| O | 1.1304453  | 6.5498736  | 0.0000000 |
| N | -0.8162927 | 5.3491824  | 0.0000000 |
| F | -1.3931543 | 1.8072788  | 0.0000000 |
| H | -3.0875944 | -2.4323267 | 0.0000000 |
| H | 2.2004717  | -6.0661674 | 0.0000000 |

## 29 (CIU...A)

|   |           |            |           |
|---|-----------|------------|-----------|
| C | 0.5240375 | -3.3694020 | 0.0000000 |
|---|-----------|------------|-----------|

|    |            |            |           |
|----|------------|------------|-----------|
| C  | -0.5082748 | -4.3063507 | 0.0000000 |
| C  | -2.0521242 | -2.7441751 | 0.0000000 |
| C  | 0.1403988  | -2.0132967 | 0.0000000 |
| C  | 1.4749349  | -5.2630690 | 0.0000000 |
| N  | 1.7610462  | -3.9726987 | 0.0000000 |
| N  | 0.1321587  | -5.5221408 | 0.0000000 |
| H  | -0.3159811 | -6.4262091 | 0.0000000 |
| N  | 1.0538724  | -1.0291606 | 0.0000000 |
| N  | -1.1693955 | -1.7275068 | 0.0000000 |
| N  | -1.8225799 | -4.0572712 | 0.0000000 |
| H  | 2.0286401  | -1.2779759 | 0.0000000 |
| H  | 0.7914635  | -0.0534847 | 0.0000000 |
| C  | 0.5740955  | 5.5119179  | 0.0000000 |
| C  | 0.6847802  | 3.0127208  | 0.0000000 |
| C  | -0.7752100 | 3.0050423  | 0.0000000 |
| C  | -1.4531819 | 4.1731831  | 0.0000000 |
| H  | 2.2425881  | 4.3457887  | 0.0000000 |
| H  | -2.5348413 | 4.2112609  | 0.0000000 |
| H  | -1.3167537 | 6.2462984  | 0.0000000 |
| N  | 1.2294016  | 4.2929139  | 0.0000000 |
| O  | 1.3985513  | 2.0230156  | 0.0000000 |
| O  | 1.1446695  | 6.5834240  | 0.0000000 |
| N  | -0.7996648 | 5.3788405  | 0.0000000 |
| Cl | -1.5436416 | 1.4820171  | 0.0000000 |
| H  | -3.0959969 | -2.4465383 | 0.0000000 |
| H  | 2.2070073  | -6.0571435 | 0.0000000 |

### 30 (BrU...A)

|    |            |            |           |
|----|------------|------------|-----------|
| C  | 0.5211001  | -3.3991939 | 0.0000000 |
| C  | -0.5067026 | -4.3411591 | 0.0000000 |
| C  | -2.0587367 | -2.7877163 | 0.0000000 |
| C  | 0.1319073  | -2.0446873 | 0.0000000 |
| C  | 1.4807289  | -5.2882724 | 0.0000000 |
| N  | 1.7607374  | -3.9964919 | 0.0000000 |
| N  | 0.1392329  | -5.5535328 | 0.0000000 |
| H  | -0.3050469 | -6.4595436 | 0.0000000 |
| N  | 1.0440475  | -1.0585570 | 0.0000000 |
| N  | -1.1802308 | -1.7667815 | 0.0000000 |
| N  | -1.8223396 | -4.0989186 | 0.0000000 |
| H  | 2.0189896  | -1.3075127 | 0.0000000 |
| H  | 0.7817406  | -0.0831311 | 0.0000000 |
| C  | 0.5841956  | 5.5638126  | 0.0000000 |
| C  | 0.6898713  | 3.0631968  | 0.0000000 |
| C  | -0.7698868 | 3.0593108  | 0.0000000 |
| C  | -1.4452957 | 4.2288574  | 0.0000000 |
| H  | 2.2500156  | 4.3956028  | 0.0000000 |
| H  | -2.5268255 | 4.2726555  | 0.0000000 |
| H  | -1.3068450 | 6.3015180  | 0.0000000 |
| N  | 1.2368556  | 4.3439480  | 0.0000000 |
| O  | 1.4055442  | 2.0744786  | 0.0000000 |
| O  | 1.1564253  | 6.6346398  | 0.0000000 |
| N  | -0.7904600 | 5.4335536  | 0.0000000 |
| Br | -1.6009768 | 1.3880388  | 0.0000000 |
| H  | -3.1040571 | -2.4948223 | 0.0000000 |
| H  | 2.2160115  | -6.0792921 | 0.0000000 |

### 31 (IU...A)

|   |            |            |           |
|---|------------|------------|-----------|
| C | 0.5233725  | -3.4560890 | 0.0000000 |
| C | -0.4962740 | -4.4067171 | 0.0000000 |
| C | -2.0626512 | -2.8686522 | 0.0000000 |
| C | 0.1232261  | -2.1046553 | 0.0000000 |
| C | 1.4981809  | -5.3372115 | 0.0000000 |
| N | 1.7676361  | -4.0430602 | 0.0000000 |
| N | 0.1589912  | -5.6133071 | 0.0000000 |
| H | -0.2793447 | -6.5221569 | 0.0000000 |
| N | 1.0304885  | -1.1134360 | 0.0000000 |
| N | -1.1923368 | -1.8396749 | 0.0000000 |
| N | -1.8141123 | -4.1766900 | 0.0000000 |
| H | 2.0063679  | -1.3595195 | 0.0000000 |

|   |            |            |           |
|---|------------|------------|-----------|
| H | 0.7645206  | -0.1391370 | 0.0000000 |
| C | 0.6090028  | 5.6443191  | 0.0000000 |
| C | 0.6689697  | 3.1424742  | 0.0000000 |
| C | -0.7910933 | 3.1594112  | 0.0000000 |
| C | -1.4427089 | 4.3436389  | 0.0000000 |
| H | 2.2533316  | 4.4470679  | 0.0000000 |
| H | -2.5233947 | 4.4135904  | 0.0000000 |
| H | -1.2690847 | 6.4145224  | 0.0000000 |
| N | 1.2394575  | 4.4139338  | 0.0000000 |
| O | 1.3733548  | 2.1445052  | 0.0000000 |
| O | 1.1994946  | 6.7055689  | 0.0000000 |
| N | -0.7679404 | 5.5374918  | 0.0000000 |
| I | -1.7063882 | 1.3218756  | 0.0000000 |
| H | -3.1105566 | -2.5854834 | 0.0000000 |
| H | 2.2394910  | -6.1226095 | 0.0000000 |

### 32 (U...FA)

|   |            |            |           |
|---|------------|------------|-----------|
| C | 0.5645281  | -3.0864829 | 0.0000000 |
| C | -0.6783761 | -3.7156260 | 0.0000000 |
| C | -1.7546675 | -1.8047769 | 0.0000000 |
| C | 0.5588222  | -1.6809485 | 0.0000000 |
| C | 0.9758619  | -5.1350444 | 0.0000000 |
| N | 1.6073874  | -3.9997719 | 0.0000000 |
| N | -0.3820160 | -5.0664467 | 0.0000000 |
| H | -1.0318878 | -5.8385691 | 0.0000000 |
| N | 1.6907898  | -0.9629129 | 0.0000000 |
| N | -0.6352903 | -1.0615289 | 0.0000000 |
| N | -1.8780748 | -3.1334375 | 0.0000000 |
| H | 2.5698714  | -1.4524735 | 0.0000000 |
| H | 1.6732277  | 0.0541555  | 0.0000000 |
| C | 0.1044168  | 5.1057570  | 0.0000000 |
| C | 0.8642998  | 2.7290072  | 0.0000000 |
| C | -0.5240789 | 2.3219876  | 0.0000000 |
| C | -1.4824884 | 3.2715089  | 0.0000000 |
| H | 2.0230416  | 4.4286689  | 0.0000000 |
| H | -2.5381880 | 3.0310073  | 0.0000000 |
| H | -1.9134437 | 5.3082907  | 0.0000000 |
| N | 1.0607977  | 4.1085671  | 0.0000000 |
| O | 1.8343334  | 1.9768876  | 0.0000000 |
| O | 0.3648159  | 6.2924180  | 0.0000000 |
| N | -1.1848814 | 4.6095873  | 0.0000000 |
| H | -2.6843669 | -1.2442278 | 0.0000000 |
| H | -0.7558408 | 1.2631157  | 0.0000000 |
| F | 1.5514069  | -6.3187118 | 0.0000000 |

### 33 (U...CIA)

|   |            |            |           |
|---|------------|------------|-----------|
| C | 0.5579566  | -3.0730883 | 0.0000000 |
| C | -0.6843365 | -3.7057114 | 0.0000000 |
| C | -1.7639681 | -1.7957972 | 0.0000000 |
| C | 0.5488256  | -1.6646215 | 0.0000000 |
| C | 0.9772828  | -5.1370725 | 0.0000000 |
| N | 1.5979872  | -3.9787253 | 0.0000000 |
| N | -0.3855911 | -5.0500390 | 0.0000000 |
| H | -1.0395872 | -5.8195475 | 0.0000000 |
| N | 1.6800421  | -0.9474674 | 0.0000000 |
| N | -0.6455652 | -1.0483572 | 0.0000000 |
| N | -1.8862469 | -3.1235365 | 0.0000000 |
| H | 2.5584713  | -1.4386967 | 0.0000000 |
| H | 1.6637168  | 0.0699558  | 0.0000000 |
| C | 0.0997344  | 5.1186927  | 0.0000000 |
| C | 0.8568850  | 2.7411689  | 0.0000000 |
| C | -0.5318717 | 2.3356151  | 0.0000000 |
| C | -1.4892398 | 3.2861944  | 0.0000000 |
| H | 2.0176207  | 4.4395596  | 0.0000000 |
| H | -2.5451749 | 3.0466685  | 0.0000000 |
| H | -1.9179107 | 5.3234375  | 0.0000000 |
| N | 1.0550473  | 4.1204186  | 0.0000000 |
| O | 1.8261321  | 1.9878536  | 0.0000000 |
| O | 0.3615106  | 6.3050250  | 0.0000000 |



|    |            |            |           |
|----|------------|------------|-----------|
| N  | -1.1901134 | 4.6239226  | 0.0000000 |
| H  | -2.6944642 | -1.2363071 | 0.0000000 |
| H  | -0.7649514 | 1.2770551  | 0.0000000 |
| Cl | 1.7378085  | -6.6565997 | 0.0000000 |

### 34 (U...BrA)

|    |            |            |           |
|----|------------|------------|-----------|
| C  | 0.5564999  | -3.0675895 | 0.0000000 |
| C  | -0.6853743 | -3.7014875 | 0.0000000 |
| C  | -1.7664768 | -1.7922967 | 0.0000000 |
| C  | 0.5461751  | -1.6585807 | 0.0000000 |
| C  | 0.9777242  | -5.1327519 | 0.0000000 |
| N  | 1.5972077  | -3.9719787 | 0.0000000 |
| N  | -0.3854637 | -5.0453706 | 0.0000000 |
| H  | -1.0401953 | -5.8144794 | 0.0000000 |
| N  | 1.6768520  | -0.9410690 | 0.0000000 |
| N  | -0.6486160 | -1.0435773 | 0.0000000 |
| N  | -1.8879321 | -3.1199226 | 0.0000000 |
| H  | 2.5553947  | -1.4321614 | 0.0000000 |
| H  | 1.6601197  | 0.0764352  | 0.0000000 |
| C  | 0.0954256  | 5.1241616  | 0.0000000 |
| C  | 0.8524964  | 2.7466601  | 0.0000000 |
| C  | -0.5362541 | 2.3411232  | 0.0000000 |
| C  | -1.4935850 | 3.2917628  | 0.0000000 |
| H  | 2.0132845  | 4.4449077  | 0.0000000 |
| H  | -2.5495219 | 3.0523338  | 0.0000000 |
| H  | -1.9221970 | 5.3290132  | 0.0000000 |
| N  | 1.0506938  | 4.1258511  | 0.0000000 |
| O  | 1.8218099  | 1.9934108  | 0.0000000 |
| O  | 0.3572534  | 6.3104659  | 0.0000000 |
| N  | -1.1944402 | 4.6294477  | 0.0000000 |
| H  | -2.6973628 | -1.2334239 | 0.0000000 |
| H  | -0.7694350 | 1.2825778  | 0.0000000 |
| Br | 1.8159173  | -6.7934618 | 0.0000000 |

### 35 (U...IA)

|   |            |            |           |
|---|------------|------------|-----------|
| C | 0.5622565  | -3.0595520 | 0.0000000 |
| C | -0.6782248 | -3.6967156 | 0.0000000 |
| C | -1.7642598 | -1.7898640 | 0.0000000 |
| C | 0.5478256  | -1.6499025 | 0.0000000 |
| C | 0.9900248  | -5.1284068 | 0.0000000 |
| N | 1.6043111  | -3.9602311 | 0.0000000 |
| N | -0.3751345 | -5.0387294 | 0.0000000 |
| H | -1.0316295 | -5.8065303 | 0.0000000 |
| N | 1.6769323  | -0.9301534 | 0.0000000 |
| N | -0.6481331 | -1.0379084 | 0.0000000 |
| N | -1.8825046 | -3.1175166 | 0.0000000 |
| H | 2.5562526  | -1.4199307 | 0.0000000 |
| H | 1.6582792  | 0.0872996  | 0.0000000 |
| C | 0.0755757  | 5.1299295  | 0.0000000 |
| C | 0.8418577  | 2.7553759  | 0.0000000 |
| C | -0.5453038 | 2.3445401  | 0.0000000 |
| C | -1.5063274 | 3.2914320  | 0.0000000 |
| H | 1.9960612  | 4.4581604  | 0.0000000 |
| H | -2.5613305 | 3.0478559  | 0.0000000 |
| H | -1.9427383 | 5.3271184  | 0.0000000 |
| N | 1.0347292  | 4.1353403  | 0.0000000 |
| O | 1.8140028  | 2.0057640  | 0.0000000 |
| O | 0.3327956  | 6.3172678  | 0.0000000 |
| N | -1.2123553 | 4.6302950  | 0.0000000 |
| H | -2.6964855 | -1.2331591 | 0.0000000 |
| I | 1.9278361  | -6.9468423 | 0.0000000 |
| H | -0.7743133 | 1.2850634  | 0.0000000 |

### 36 (FU...FA)

|   |            |            |           |
|---|------------|------------|-----------|
| C | 0.5250749  | -3.3549305 | 0.0000000 |
| C | -0.5169902 | -4.2794142 | 0.0000000 |
| C | -2.0426684 | -2.7019479 | 0.0000000 |
| C | 0.1582368  | -1.9989805 | 0.0000000 |

|   |            |            |           |
|---|------------|------------|-----------|
| C | 1.4446648  | -5.2314097 | 0.0000000 |
| N | 1.7669413  | -3.9733449 | 0.0000000 |
| N | 0.1144290  | -5.5112856 | 0.0000000 |
| H | -0.3167592 | -6.4235670 | 0.0000000 |
| N | 1.0738732  | -1.0167982 | 0.0000000 |
| N | -1.1498671 | -1.6994660 | 0.0000000 |
| N | -1.8241283 | -4.0207319 | 0.0000000 |
| H | 2.0498691  | -1.2593710 | 0.0000000 |
| H | 0.8039677  | -0.0427605 | 0.0000000 |
| C | 0.5584755  | 5.4665099  | 0.0000000 |
| C | 0.6487857  | 2.9643148  | 0.0000000 |
| C | -0.8049450 | 2.9867979  | 0.0000000 |
| C | -1.4835151 | 4.1483719  | 0.0000000 |
| H | 2.2168716  | 4.2828818  | 0.0000000 |
| H | -2.5647490 | 4.1796993  | 0.0000000 |
| H | -1.3228768 | 6.2216511  | 0.0000000 |
| N | 1.2033374  | 4.2378730  | 0.0000000 |
| O | 1.3408477  | 1.9590027  | 0.0000000 |
| O | 1.1453866  | 6.5290822  | 0.0000000 |
| N | -0.8145986 | 5.3496706  | 0.0000000 |
| H | -3.0837941 | -2.3960106 | 0.0000000 |
| F | 2.3037991  | -6.2299787 | 0.0000000 |
| F | -1.4296688 | 1.8141420  | 0.0000000 |

### 37 (ClU...ClA)

|    |            |            |           |
|----|------------|------------|-----------|
| C  | 0.5139570  | -3.3491009 | 0.0000000 |
| C  | -0.5240602 | -4.2798867 | 0.0000000 |
| C  | -2.0578091 | -2.7102661 | 0.0000000 |
| C  | 0.1403547  | -1.9913734 | 0.0000000 |
| C  | 1.4502152  | -5.2359738 | 0.0000000 |
| N  | 1.7524360  | -3.9571861 | 0.0000000 |
| N  | 0.1112108  | -5.5025883 | 0.0000000 |
| H  | -0.3230592 | -6.4141351 | 0.0000000 |
| N  | 1.0565435  | -1.0104199 | 0.0000000 |
| N  | -1.1693590 | -1.7008815 | 0.0000000 |
| N  | -1.8344657 | -4.0261364 | 0.0000000 |
| H  | 2.0315384  | -1.2589569 | 0.0000000 |
| H  | 0.7950979  | -0.0340063 | 0.0000000 |
| C  | 0.5490749  | 5.5232543  | 0.0000000 |
| C  | 0.6646347  | 3.0244099  | 0.0000000 |
| C  | -0.7950648 | 3.0143411  | 0.0000000 |
| C  | -1.4755539 | 4.1809340  | 0.0000000 |
| H  | 2.2197930  | 4.3605368  | 0.0000000 |
| H  | -2.5573616 | 4.2153773  | 0.0000000 |
| H  | -1.3439440 | 6.2537177  | 0.0000000 |
| N  | 1.2066531  | 4.3051971  | 0.0000000 |
| O  | 1.3799962  | 2.0355257  | 0.0000000 |
| O  | 1.1179914  | 6.5955311  | 0.0000000 |
| N  | -0.8246080 | 5.3876032  | 0.0000000 |
| H  | -3.0999617 | -2.4070184 | 0.0000000 |
| Cl | -1.5612141 | 1.4903922  | 0.0000000 |
| Cl | 2.5769644  | -6.5088907 | 0.0000000 |

### 38 (BrU...BrA)

|   |            |            |           |
|---|------------|------------|-----------|
| C | 0.5079016  | -3.3772189 | 0.0000000 |
| C | -0.5202380 | -4.3193403 | 0.0000000 |
| C | -2.0712825 | -2.7676925 | 0.0000000 |
| C | 0.1201761  | -2.0227766 | 0.0000000 |
| C | 1.4641608  | -5.2559168 | 0.0000000 |
| N | 1.7522320  | -3.9720700 | 0.0000000 |
| N | 0.1271874  | -5.5348611 | 0.0000000 |
| H | -0.3007545 | -6.4496425 | 0.0000000 |
| N | 1.0287558  | -1.0343173 | 0.0000000 |
| N | -1.1933492 | -1.7483272 | 0.0000000 |
| N | -1.8336820 | -4.0801809 | 0.0000000 |
| H | 2.0053832  | -1.2770971 | 0.0000000 |
| H | 0.7614621  | -0.0597173 | 0.0000000 |
| C | 0.5633292  | 5.5808318  | 0.0000000 |
| C | 0.6569362  | 3.0802867  | 0.0000000 |

|    |            |            |           |
|----|------------|------------|-----------|
| C  | -0.8027811 | 3.0836239  | 0.0000000 |
| C  | -1.4729038 | 4.2562826  | 0.0000000 |
| H  | 2.2237855  | 4.4054643  | 0.0000000 |
| H  | -2.5542851 | 4.3045336  | 0.0000000 |
| H  | -1.3233120 | 6.3283896  | 0.0000000 |
| N  | 1.2102713  | 4.3577815  | 0.0000000 |
| O  | 1.3674634  | 2.0876332  | 0.0000000 |
| O  | 1.1405571  | 6.6487567  | 0.0000000 |
| N  | -0.8120469 | 5.4573872  | 0.0000000 |
| H  | -3.1168703 | -2.4760703 | 0.0000000 |
| Br | -1.6433030 | 1.4174497  | 0.0000000 |
| Br | 2.7152067  | -6.6331921 | 0.0000000 |

### 39 (IU...IA)

|   |            |            |           |
|---|------------|------------|-----------|
| C | 0.5046342  | -3.4280198 | 0.0000000 |
| C | -0.5112447 | -4.3839161 | 0.0000000 |
| C | -2.0829550 | -2.8527624 | 0.0000000 |
| C | 0.0997627  | -2.0778851 | 0.0000000 |
| C | 1.4876586  | -5.2980921 | 0.0000000 |
| N | 1.7552059  | -4.0054884 | 0.0000000 |
| N | 0.1512883  | -5.5896929 | 0.0000000 |
| H | -0.2673342 | -6.5091389 | 0.0000000 |
| N | 0.9987053  | -1.0801970 | 0.0000000 |
| N | -1.2176721 | -1.8212757 | 0.0000000 |
| N | -1.8282589 | -4.1609889 | 0.0000000 |
| H | 1.9776292  | -1.3143827 | 0.0000000 |
| H | 0.7216595  | -0.1085658 | 0.0000000 |
| C | 0.5861659  | 5.6637400  | 0.0000000 |
| C | 0.6280954  | 3.1623285  | 0.0000000 |
| C | -0.8318386 | 3.1898803  | 0.0000000 |
| C | -1.4753012 | 4.3786922  | 0.0000000 |
| H | 2.2224712  | 4.4559563  | 0.0000000 |
| H | -2.5553015 | 4.4566919  | 0.0000000 |
| H | -1.2853126 | 6.4486507  | 0.0000000 |
| N | 1.2082794  | 4.4291059  | 0.0000000 |
| O | 1.3244663  | 2.1586761  | 0.0000000 |
| O | 1.1838805  | 6.7206728  | 0.0000000 |
| N | -0.7916782 | 5.5672026  | 0.0000000 |
| H | -3.1322228 | -2.5747728 | 0.0000000 |
| I | -1.7618756 | 1.3606388  | 0.0000000 |
| I | 2.8910931  | -6.7870577 | 0.0000000 |

### Binding mode d

#### 40 (U...A)

|   |            |            |           |
|---|------------|------------|-----------|
| C | -0.0473375 | -2.3145463 | 0.0000000 |
| C | -0.7025800 | -3.5478128 | 0.0000000 |
| C | 1.1808690  | -4.6733225 | 0.0000000 |
| C | 1.3635142  | -2.3647628 | 0.0000000 |
| C | -2.1263307 | -1.8698566 | 0.0000000 |
| N | -0.9474116 | -1.2694730 | 0.0000000 |
| N | -2.0398250 | -3.2309685 | 0.0000000 |
| H | -2.8007120 | -3.8938735 | 0.0000000 |
| N | 2.1401357  | -1.2724470 | 0.0000000 |
| N | 1.9488631  | -3.5720057 | 0.0000000 |
| N | -0.1495071 | -4.7640366 | 0.0000000 |
| H | 1.7752218  | -0.3268962 | 0.0000000 |
| H | 3.1366772  | -1.4158866 | 0.0000000 |
| C | 0.2286415  | 4.8461162  | 0.0000000 |
| C | 0.8864477  | 2.4383845  | 0.0000000 |
| C | -0.5185337 | 2.0913630  | 0.0000000 |
| C | -1.4353089 | 3.0809674  | 0.0000000 |
| H | 2.1163929  | 4.0883983  | 0.0000000 |
| H | -2.5005201 | 2.8866733  | 0.0000000 |
| H | -1.7785676 | 5.1349618  | 0.0000000 |
| N | 1.1414364  | 3.8094229  | 0.0000000 |
| O | 1.8212862  | 1.6449187  | 0.0000000 |
| O | 0.5383735  | 6.0209012  | 0.0000000 |
| N | -1.0809267 | 4.4054381  | 0.0000000 |

|   |            |            |           |
|---|------------|------------|-----------|
| H | 1.7219691  | -5.6140930 | 0.0000000 |
| H | -3.0789846 | -1.3608093 | 0.0000000 |
| H | -0.7932829 | 1.0432449  | 0.0000000 |

#### 41 (FU...A)

|   |            |            |           |
|---|------------|------------|-----------|
| C | -0.2738930 | -2.7521887 | 0.0000000 |
| C | -0.5922583 | -4.1113536 | 0.0000000 |
| C | 1.5204059  | -4.7123539 | 0.0000000 |
| C | 1.0999727  | -2.4392136 | 0.0000000 |
| C | -2.3916248 | -2.8430783 | 0.0000000 |
| N | -1.4040082 | -1.9650607 | 0.0000000 |
| N | -1.9658576 | -4.1423859 | 0.0000000 |
| H | -2.5365943 | -4.9744521 | 0.0000000 |
| N | 1.5534463  | -1.1757914 | 0.0000000 |
| N | 1.9806694  | -3.4492030 | 0.0000000 |
| N | 0.2583311  | -5.1429118 | 0.0000000 |
| H | 0.9342835  | -0.3816440 | 0.0000000 |
| H | 2.5469617  | -1.0183741 | 0.0000000 |
| C | 0.6132464  | 5.2625599  | 0.0000000 |
| C | 0.8761438  | 2.7716050  | 0.0000000 |
| C | -0.5765905 | 2.6963989  | 0.0000000 |
| C | -1.3342401 | 3.8074696  | 0.0000000 |
| H | 2.3496739  | 4.1975391  | 0.0000000 |
| H | -2.4150801 | 3.7648684  | 0.0000000 |
| H | -1.3152415 | 5.8873452  | 0.0000000 |
| N | 1.3417673  | 4.0819485  | 0.0000000 |
| O | 1.6298202  | 1.8131862  | 0.0000000 |
| O | 1.1244772  | 6.3637224  | 0.0000000 |
| N | -0.7488932 | 5.0520059  | 0.0000000 |
| F | -1.1185718 | 1.4819238  | 0.0000000 |
| H | 2.2853359  | -5.4822823 | 0.0000000 |
| H | -3.4416821 | -2.5902795 | 0.0000000 |

#### 42 (CIU...A)

|    |            |            |           |
|----|------------|------------|-----------|
| C  | -0.2805476 | -2.7471964 | 0.0000000 |
| C  | -0.5936254 | -4.1085782 | 0.0000000 |
| C  | 1.5188128  | -4.7072195 | 0.0000000 |
| C  | 1.0948349  | -2.4322846 | 0.0000000 |
| C  | -2.4017501 | -2.8534531 | 0.0000000 |
| N  | -1.4190022 | -1.9689760 | 0.0000000 |
| N  | -1.9670381 | -4.1480394 | 0.0000000 |
| H  | -2.5311483 | -4.9847900 | 0.0000000 |
| N  | 1.5610395  | -1.1736638 | 0.0000000 |
| N  | 1.9750417  | -3.4436845 | 0.0000000 |
| N  | 0.2573942  | -5.1390613 | 0.0000000 |
| H  | 0.9577268  | -0.3671200 | 0.0000000 |
| H  | 2.5578339  | -1.0353666 | 0.0000000 |
| C  | 0.6302865  | 5.2923305  | 0.0000000 |
| C  | 0.8846429  | 2.8025246  | 0.0000000 |
| C  | -0.5731917 | 2.7118532  | 0.0000000 |
| C  | -1.3173593 | 3.8388788  | 0.0000000 |
| H  | 2.3623092  | 4.2248845  | 0.0000000 |
| H  | -2.3996302 | 3.8142746  | 0.0000000 |
| H  | -1.3000069 | 5.9164002  | 0.0000000 |
| N  | 1.3539774  | 4.1133019  | 0.0000000 |
| O  | 1.6518125  | 1.8550724  | 0.0000000 |
| O  | 1.1381527  | 6.3950312  | 0.0000000 |
| N  | -0.7340269 | 5.0801629  | 0.0000000 |
| Cl | -1.2584696 | 1.1474715  | 0.0000000 |
| H  | 2.2852815  | -5.4757980 | 0.0000000 |
| H  | -3.4533502 | -2.6069547 | 0.0000000 |

#### 43 (BrU...A)

|   |            |            |           |
|---|------------|------------|-----------|
| C | -0.2841675 | -2.7719076 | 0.0000000 |
| C | -0.5967918 | -4.1339908 | 0.0000000 |
| C | 1.5143631  | -4.7338242 | 0.0000000 |
| C | 1.0925076  | -2.4572535 | 0.0000000 |

|    |            |            |           |
|----|------------|------------|-----------|
| C  | -2.4082087 | -2.8839098 | 0.0000000 |
| N  | -1.4264728 | -1.9980222 | 0.0000000 |
| N  | -1.9701657 | -4.1759160 | 0.0000000 |
| H  | -2.5325346 | -5.0139208 | 0.0000000 |
| N  | 1.5667853  | -1.2013834 | 0.0000000 |
| N  | 1.9704271  | -3.4707668 | 0.0000000 |
| N  | 0.2528075  | -5.1650086 | 0.0000000 |
| H  | 0.9695453  | -0.3900009 | 0.0000000 |
| H  | 2.5649112  | -1.0718978 | 0.0000000 |
| C  | 0.6322946  | 5.3409442  | 0.0000000 |
| C  | 0.8944899  | 2.8513815  | 0.0000000 |
| C  | -0.5627761 | 2.7559657  | 0.0000000 |
| C  | -1.3097744 | 3.8811031  | 0.0000000 |
| H  | 2.3680524  | 4.2800855  | 0.0000000 |
| H  | -2.3920818 | 3.8580334  | 0.0000000 |
| H  | -1.3008646 | 5.9589361  | 0.0000000 |
| N  | 1.3600130  | 4.1650622  | 0.0000000 |
| O  | 1.6694987  | 1.9096600  | 0.0000000 |
| O  | 1.1351944  | 6.4460520  | 0.0000000 |
| N  | -0.7317984 | 5.1246173  | 0.0000000 |
| Br | -1.2961563 | 1.0361212  | 0.0000000 |
| H  | 2.2806526  | -5.5023565 | 0.0000000 |
| H  | -3.4597499 | -2.6378033 | 0.0000000 |

#### 44 (IU...A)

|   |            |            |           |
|---|------------|------------|-----------|
| C | -0.2897723 | -2.8292531 | 0.0000000 |
| C | -0.5945976 | -4.1938781 | 0.0000000 |
| C | 1.5178866  | -4.7857622 | 0.0000000 |
| C | 1.0874306  | -2.5091328 | 0.0000000 |
| C | -2.4173837 | -2.9608785 | 0.0000000 |
| N | -1.4417604 | -2.0673446 | 0.0000000 |
| N | -1.9674922 | -4.2469347 | 0.0000000 |
| H | -2.5212922 | -5.0908154 | 0.0000000 |
| N | 1.5677520  | -1.2553974 | 0.0000000 |
| N | 1.9672815  | -3.5212088 | 0.0000000 |
| N | 0.2581387  | -5.2215445 | 0.0000000 |
| H | 0.9753630  | -0.4400771 | 0.0000000 |
| H | 2.5673066  | -1.1347167 | 0.0000000 |
| C | 0.6490095  | 5.4281862  | 0.0000000 |
| C | 0.8869020  | 2.9369566  | 0.0000000 |
| C | -0.5710123 | 2.8482912  | 0.0000000 |
| C | -1.3044262 | 3.9835437  | 0.0000000 |
| H | 2.3749208  | 4.3526524  | 0.0000000 |
| H | -2.3873059 | 3.9779552  | 0.0000000 |
| H | -1.2788955 | 6.0621931  | 0.0000000 |
| N | 1.3659026  | 4.2468501  | 0.0000000 |
| O | 1.6599266  | 1.9921889  | 0.0000000 |
| O | 1.1609397  | 6.5296102  | 0.0000000 |
| N | -0.7168829 | 5.2229658  | 0.0000000 |
| I | -1.3646283 | 0.9491622  | 0.0000000 |
| H | 2.2874360  | -5.5509629 | 0.0000000 |
| H | -3.4707466 | -2.7226490 | 0.0000000 |

#### 45 (U...FA)

|   |            |            |           |
|---|------------|------------|-----------|
| C | -0.0260033 | -2.3284068 | 0.0000000 |
| C | -0.6840336 | -3.5585594 | 0.0000000 |
| C | 1.1950333  | -4.6870600 | 0.0000000 |
| C | 1.3802431  | -2.3774485 | 0.0000000 |
| C | -2.0735966 | -1.8809837 | 0.0000000 |
| N | -0.9269380 | -1.2699584 | 0.0000000 |
| N | -2.0309475 | -3.2358038 | 0.0000000 |
| H | -2.8130451 | -3.8737152 | 0.0000000 |
| N | 2.1591830  | -1.2861595 | 0.0000000 |
| N | 1.9625729  | -3.5888220 | 0.0000000 |
| N | -0.1386848 | -4.7729281 | 0.0000000 |
| H | 1.7947518  | -0.3397978 | 0.0000000 |
| H | 3.1553643  | -1.4314644 | 0.0000000 |
| C | 0.2400410  | 4.8451582  | 0.0000000 |
| C | 0.8687898  | 2.4297847  | 0.0000000 |

|   |            |            |           |
|---|------------|------------|-----------|
| C | -0.5400226 | 2.1014735  | 0.0000000 |
| C | -1.4456691 | 3.1012362  | 0.0000000 |
| H | 2.1185678  | 4.0645724  | 0.0000000 |
| H | -2.5127567 | 2.9175942  | 0.0000000 |
| H | -1.7637770 | 5.1585842  | 0.0000000 |
| N | 1.1403869  | 3.7971711  | 0.0000000 |
| O | 1.7941412  | 1.6247272  | 0.0000000 |
| O | 0.5647544  | 6.0157970  | 0.0000000 |
| N | -1.0749139 | 4.4207328  | 0.0000000 |
| H | 1.7317226  | -5.6300565 | 0.0000000 |
| H | -0.8297861 | 1.0590373  | 0.0000000 |
| F | -3.2453778 | -1.2747047 | 0.0000000 |

#### 46 (U...CIA)

|    |            |            |           |
|----|------------|------------|-----------|
| C  | 0.0042401  | -2.3224986 | 0.0000000 |
| C  | -0.6602425 | -3.5503978 | 0.0000000 |
| C  | 1.2155747  | -4.6856440 | 0.0000000 |
| C  | 1.4133001  | -2.3774035 | 0.0000000 |
| C  | -2.0568478 | -1.8613505 | 0.0000000 |
| N  | -0.8856198 | -1.2653534 | 0.0000000 |
| N  | -1.9997876 | -3.2219646 | 0.0000000 |
| H  | -2.7807183 | -3.8624536 | 0.0000000 |
| N  | 2.1922594  | -1.2875351 | 0.0000000 |
| N  | 1.9897449  | -3.5900598 | 0.0000000 |
| N  | -0.1173621 | -4.7680165 | 0.0000000 |
| H  | 1.8266634  | -0.3410207 | 0.0000000 |
| H  | 3.1886832  | -1.4325149 | 0.0000000 |
| C  | 0.2199631  | 4.8251772  | 0.0000000 |
| C  | 0.8714683  | 2.4158532  | 0.0000000 |
| C  | -0.5339831 | 2.0739807  | 0.0000000 |
| C  | -1.4489603 | 3.0651826  | 0.0000000 |
| H  | 2.1057804  | 4.0624072  | 0.0000000 |
| H  | -2.5142118 | 2.8709492  | 0.0000000 |
| H  | -1.7867723 | 5.1195239  | 0.0000000 |
| N  | 1.1301842  | 3.7857244  | 0.0000000 |
| O  | 1.8049880  | 1.6198814  | 0.0000000 |
| O  | 0.5338504  | 5.9988795  | 0.0000000 |
| N  | -1.0908595 | 4.3883373  | 0.0000000 |
| H  | 1.7492870  | -5.6304623 | 0.0000000 |
| H  | -0.8131354 | 1.0283097  | 0.0000000 |
| Cl | -3.5574867 | -1.0575309 | 0.0000000 |

#### 47 (U...BrA)

|   |            |            |           |
|---|------------|------------|-----------|
| C | 0.0167525  | -2.3215100 | 0.0000000 |
| C | -0.6482188 | -3.5493053 | 0.0000000 |
| C | 1.2277275  | -4.6845911 | 0.0000000 |
| C | 1.4262936  | -2.3765039 | 0.0000000 |
| C | -2.0455052 | -1.8594589 | 0.0000000 |
| N | -0.8722798 | -1.2642811 | 0.0000000 |
| N | -1.9875303 | -3.2204678 | 0.0000000 |
| H | -2.7674242 | -3.8624916 | 0.0000000 |
| N | 2.2044516  | -1.2864353 | 0.0000000 |
| N | 2.0023790  | -3.5890442 | 0.0000000 |
| N | -0.1050541 | -4.7671272 | 0.0000000 |
| H | 1.8379928  | -0.3401227 | 0.0000000 |
| H | 3.2009769  | -1.4309909 | 0.0000000 |
| C | 0.2088825  | 4.8186808  | 0.0000000 |
| C | 0.8729560  | 2.4130613  | 0.0000000 |
| C | -0.5306119 | 2.0640572  | 0.0000000 |
| C | -1.4510424 | 3.0500488  | 0.0000000 |
| H | 2.0987853  | 4.0664320  | 0.0000000 |
| H | -2.5151678 | 2.8492469  | 0.0000000 |
| H | -1.7988242 | 5.1031427  | 0.0000000 |
| N | 1.1247779  | 3.7841748  | 0.0000000 |
| O | 1.8102038  | 1.6213471  | 0.0000000 |
| O | 0.5165375  | 5.9940482  | 0.0000000 |
| N | -1.0996338 | 4.3750804  | 0.0000000 |
| H | 1.7615492  | -5.6293725 | 0.0000000 |
| H | -0.8037980 | 1.0168841  | 0.0000000 |

|    |            |            |           |
|----|------------|------------|-----------|
| Br | -3.6851756 | -0.9745018 | 0.0000000 |
|----|------------|------------|-----------|

#### 48 (U...IA)

|   |            |            |           |
|---|------------|------------|-----------|
| C | 0.0170835  | -2.3191661 | 0.0000000 |
| C | -0.6609305 | -3.5400068 | 0.0000000 |
| C | 1.2039042  | -4.6941885 | 0.0000000 |
| C | 1.4265963  | -2.3885629 | 0.0000000 |
| C | -2.0446661 | -1.8336559 | 0.0000000 |
| N | -0.8594791 | -1.2539082 | 0.0000000 |
| N | -1.9958067 | -3.1972350 | 0.0000000 |
| H | -2.7796238 | -3.8347236 | 0.0000000 |
| N | 2.2140318  | -1.3052917 | 0.0000000 |
| N | 1.9903564  | -3.6064653 | 0.0000000 |
| N | -0.1294436 | -4.7635138 | 0.0000000 |
| H | 1.8544264  | -0.3562483 | 0.0000000 |
| H | 3.2094187  | -1.4575843 | 0.0000000 |
| C | 0.2285180  | 4.8072041  | 0.0000000 |
| C | 0.8905303  | 2.4008354  | 0.0000000 |
| C | -0.5133934 | 2.0533875  | 0.0000000 |
| C | -1.4329545 | 3.0401771  | 0.0000000 |
| H | 2.1178058  | 4.0530268  | 0.0000000 |
| H | -2.4972409 | 2.8399778  | 0.0000000 |
| H | -1.7790592 | 5.0935258  | 0.0000000 |
| N | 1.1434961  | 3.7718300  | 0.0000000 |
| O | 1.8271911  | 1.6083527  | 0.0000000 |
| O | 0.5372221  | 5.9823279  | 0.0000000 |
| N | -1.0804517 | 4.3649106  | 0.0000000 |
| H | 1.7281767  | -5.6443053 | 0.0000000 |
| I | -3.8288115 | -0.8268559 | 0.0000000 |
| H | -0.7868965 | 1.0061560  | 0.0000000 |

#### 49 (FU...FA)

|   |            |            |           |
|---|------------|------------|-----------|
| C | -0.2608327 | -2.7359373 | 0.0000000 |
| C | -0.5852212 | -4.0926034 | 0.0000000 |
| C | 1.5215017  | -4.7046072 | 0.0000000 |
| C | 1.1100662  | -2.4283718 | 0.0000000 |
| C | -2.3496998 | -2.8134369 | 0.0000000 |
| N | -1.3941342 | -1.9345429 | 0.0000000 |
| N | -1.9686709 | -4.1178564 | 0.0000000 |
| H | -2.5672478 | -4.9301735 | 0.0000000 |
| N | 1.5760019  | -1.1694531 | 0.0000000 |
| N | 1.9853148  | -3.4463693 | 0.0000000 |
| N | 0.2538628  | -5.1271587 | 0.0000000 |
| H | 0.9702697  | -0.3648587 | 0.0000000 |
| H | 2.5715081  | -1.0249403 | 0.0000000 |
| C | 0.6274936  | 5.2352938  | 0.0000000 |
| C | 0.8735822  | 2.7434675  | 0.0000000 |
| C | -0.5791966 | 2.6769241  | 0.0000000 |
| C | -1.3296330 | 3.7929505  | 0.0000000 |
| H | 2.3569255  | 4.1581997  | 0.0000000 |
| H | -2.4107631 | 3.7572940  | 0.0000000 |
| H | -1.2969692 | 5.8725464  | 0.0000000 |
| N | 1.3482447  | 4.0497086  | 0.0000000 |
| O | 1.6217226  | 1.7802007  | 0.0000000 |
| O | 1.1465331  | 6.3326444  | 0.0000000 |
| N | -0.7360175 | 5.0334798  | 0.0000000 |
| H | 2.2805855  | -5.4797757 | 0.0000000 |
| F | -3.6366932 | -2.5283521 | 0.0000000 |
| F | -1.1285332 | 1.4657280  | 0.0000000 |

#### 50 (CIU...CIA)

|   |            |            |           |
|---|------------|------------|-----------|
| C | -0.2456430 | -2.7420872 | 0.0000000 |
| C | -0.5730006 | -4.0999845 | 0.0000000 |
| C | 1.5315974  | -4.7182557 | 0.0000000 |
| C | 1.1307000  | -2.4379855 | 0.0000000 |

|    |            |            |           |
|----|------------|------------|-----------|
| C  | -2.3547595 | -2.8226293 | 0.0000000 |
| N  | -1.3755889 | -1.9465751 | 0.0000000 |
| N  | -1.9508219 | -4.1246891 | 0.0000000 |
| H  | -2.5424320 | -4.9430462 | 0.0000000 |
| N  | 1.6080230  | -1.1841174 | 0.0000000 |
| N  | 1.9994837  | -3.4605338 | 0.0000000 |
| N  | 0.2641966  | -5.1378458 | 0.0000000 |
| H  | 1.0130580  | -0.3707019 | 0.0000000 |
| H  | 2.6060923  | -1.0544928 | 0.0000000 |
| C  | 0.6415350  | 5.2751655  | 0.0000000 |
| C  | 0.9015351  | 2.7861921  | 0.0000000 |
| C  | -0.5557179 | 2.6928278  | 0.0000000 |
| C  | -1.3023684 | 3.8180989  | 0.0000000 |
| H  | 2.3763366  | 4.2113028  | 0.0000000 |
| H  | -2.3844103 | 3.7903149  | 0.0000000 |
| H  | -1.2905688 | 5.8951381  | 0.0000000 |
| N  | 1.3681870  | 4.0974494  | 0.0000000 |
| O  | 1.6710271  | 1.8400500  | 0.0000000 |
| O  | 1.1469231  | 6.3788508  | 0.0000000 |
| N  | -0.7222299 | 5.0604174  | 0.0000000 |
| H  | 2.2894225  | -5.4950441 | 0.0000000 |
| Cl | -4.0108798 | -2.4361899 | 0.0000000 |
| Cl | -1.2396964 | 1.1283704  | 0.0000000 |

### 51 (BrU...BrA)

|    |            |            |           |
|----|------------|------------|-----------|
| C  | -0.2468874 | -2.7775989 | 0.0000000 |
| C  | -0.5629620 | -4.1389628 | 0.0000000 |
| C  | 1.5457625  | -4.7411177 | 0.0000000 |
| C  | 1.1286623  | -2.4625766 | 0.0000000 |
| C  | -2.3596860 | -2.8811671 | 0.0000000 |
| N  | -1.3866414 | -1.9956046 | 0.0000000 |
| N  | -1.9404429 | -4.1777868 | 0.0000000 |
| H  | -2.5217529 | -5.0039548 | 0.0000000 |
| N  | 1.6029240  | -1.2075874 | 0.0000000 |
| N  | 2.0034769  | -3.4799353 | 0.0000000 |
| N  | 0.2818811  | -5.1704650 | 0.0000000 |
| H  | 1.0066505  | -0.3947533 | 0.0000000 |
| H  | 2.6013307  | -1.0786754 | 0.0000000 |
| C  | 0.6622208  | 5.3265384  | 0.0000000 |
| C  | 0.9071988  | 2.8354199  | 0.0000000 |
| C  | -0.5504172 | 2.7503835  | 0.0000000 |
| C  | -1.2898948 | 3.8806092  | 0.0000000 |
| H  | 2.3905549  | 4.2542429  | 0.0000000 |
| H  | -2.3723117 | 3.8642699  | 0.0000000 |
| H  | -1.2661106 | 5.9584655  | 0.0000000 |
| N  | 1.3818563  | 4.1454014  | 0.0000000 |
| O  | 1.6757758  | 1.8880286  | 0.0000000 |
| O  | 1.1729992  | 6.4279236  | 0.0000000 |
| N  | -0.7032984 | 5.1198299  | 0.0000000 |
| H  | 2.3097701  | -5.5117014 | 0.0000000 |
| Br | -4.1736194 | -2.4660813 | 0.0000000 |
| Br | -1.2970390 | 1.0368557  | 0.0000000 |

### 52 (IU...IA)

|   |            |            |           |
|---|------------|------------|-----------|
| C | -0.2447122 | -2.8351972 | 0.0000000 |
| C | -0.5475873 | -4.2004586 | 0.0000000 |
| C | 1.5663203  | -4.7841051 | 0.0000000 |
| C | 1.1301750  | -2.5081429 | 0.0000000 |
| C | -2.3655061 | -2.9652420 | 0.0000000 |
| N | -1.3949893 | -2.0698961 | 0.0000000 |
| N | -1.9235699 | -4.2551989 | 0.0000000 |
| H | -2.4899767 | -5.0919180 | 0.0000000 |
| N | 1.6013887  | -1.2519646 | 0.0000000 |
| N | 2.0122716  | -3.5189231 | 0.0000000 |
| N | 0.3065498  | -5.2244000 | 0.0000000 |
| H | 1.0034539  | -0.4399180 | 0.0000000 |
| H | 2.6001272  | -1.1235092 | 0.0000000 |
| C | 0.6935760  | 5.4018040  | 0.0000000 |
| C | 0.8945985  | 2.9078146  | 0.0000000 |



|   |            |            |           |
|---|------------|------------|-----------|
| C | -0.5641990 | 2.8408366  | 0.0000000 |
| C | -1.2811975 | 3.9866708  | 0.0000000 |
| H | 2.4035267  | 4.3007623  | 0.0000000 |
| H | -2.3640474 | 3.9967681  | 0.0000000 |
| H | -1.2241471 | 6.0650024  | 0.0000000 |
| N | 1.3930183  | 4.2098134  | 0.0000000 |
| O | 1.6533242  | 1.9511753  | 0.0000000 |
| O | 1.2219925  | 6.4952446  | 0.0000000 |
| N | -0.6752696 | 5.2170158  | 0.0000000 |
| H | 2.3374575  | -5.5475066 | 0.0000000 |
| I | -1.3833795 | 0.9536339  | 0.0000000 |
| I | -4.3591982 | -2.5101615 | 0.0000000 |

## Binding mode a 53 (C...G)

|   |            |            |           |
|---|------------|------------|-----------|
| C | 1.0373834  | -2.9498286 | 0.0000000 |
| C | -0.2202566 | -3.5502259 | 0.0000000 |
| C | -1.3710624 | -1.6660649 | 0.0000000 |
| C | 1.0927390  | -1.5236462 | 0.0000000 |
| C | 1.4048496  | -5.0385410 | 0.0000000 |
| N | 2.0448364  | -3.8869253 | 0.0000000 |
| N | 0.0394019  | -4.8926387 | 0.0000000 |
| H | -0.6578366 | -5.6218375 | 0.0000000 |
| N | -0.1899108 | -0.9713849 | 0.0000000 |
| N | -1.4439621 | -2.9814719 | 0.0000000 |
| C | -1.3678365 | 2.5682089  | 0.0000000 |
| C | -0.2274459 | 4.6986091  | 0.0000000 |
| C | 0.9768218  | 4.0809772  | 0.0000000 |
| C | 0.9708497  | 2.6455754  | 0.0000000 |
| N | -1.3671497 | 3.9649521  | 0.0000000 |
| O | -2.4491978 | 1.9773463  | 0.0000000 |
| N | -0.1619440 | 1.9441061  | 0.0000000 |
| N | -2.4968673 | -0.9258067 | 0.0000000 |
| H | -2.4873101 | 0.0931844  | 0.0000000 |
| H | -3.3663632 | -1.4291172 | 0.0000000 |
| O | 2.0891728  | -0.7912618 | 0.0000000 |
| H | -0.3422424 | 5.7751661  | 0.0000000 |
| N | 2.1180820  | 1.9706591  | 0.0000000 |
| H | 2.9905596  | 2.4704645  | 0.0000000 |
| H | 2.1148840  | 0.9348938  | 0.0000000 |
| H | -0.2223586 | 0.0637524  | 0.0000000 |
| H | -2.2776133 | 4.4031006  | 0.0000000 |
| H | 1.8739732  | -6.0109078 | 0.0000000 |
| H | 1.8958040  | 4.6486622  | 0.0000000 |

## 54 (FC...G)

|   |            |            |           |
|---|------------|------------|-----------|
| C | 1.0317054  | -2.9503028 | 0.0000000 |
| C | -0.2256114 | -3.5526607 | 0.0000000 |
| C | -1.3803195 | -1.6715930 | 0.0000000 |
| C | 1.0844670  | -1.5241832 | 0.0000000 |
| C | 1.4008939  | -5.0387380 | 0.0000000 |
| N | 2.0398547  | -3.8866376 | 0.0000000 |
| N | 0.0352597  | -4.8943020 | 0.0000000 |
| H | -0.6617472 | -5.6238053 | 0.0000000 |
| N | -0.1996786 | -0.9758514 | 0.0000000 |
| N | -1.4506037 | -2.9866331 | 0.0000000 |
| C | -1.3874696 | 2.5708378  | 0.0000000 |
| C | -0.2353284 | 4.7009378  | 0.0000000 |
| C | 0.9460932  | 4.0529419  | 0.0000000 |
| C | 0.9608624  | 2.6193484  | 0.0000000 |
| N | -1.3805277 | 3.9632049  | 0.0000000 |
| O | -2.4670001 | 1.9771262  | 0.0000000 |
| N | -0.1799698 | 1.9394379  | 0.0000000 |
| N | -2.5068679 | -0.9322152 | 0.0000000 |
| H | -2.4990460 | 0.0862702  | 0.0000000 |
| H | -3.3762521 | -1.4357253 | 0.0000000 |
| O | 2.0782907  | -0.7872801 | 0.0000000 |
| H | -0.3144883 | 5.7796946  | 0.0000000 |

|   |            |            |           |
|---|------------|------------|-----------|
| N | 2.1185431  | 1.9703484  | 0.0000000 |
| H | 2.9770738  | 2.4959367  | 0.0000000 |
| H | 2.1283210  | 0.9325508  | 0.0000000 |
| H | -0.2349640 | 0.0574276  | 0.0000000 |
| H | -2.2870099 | 4.4094847  | 0.0000000 |
| F | 2.1146122  | 4.7149336  | 0.0000000 |
| H | 1.8709069  | -6.0105537 | 0.0000000 |

### 55 (ClC...G)

|    |            |            |           |
|----|------------|------------|-----------|
| C  | 1.0198107  | -2.9592356 | 0.0000000 |
| C  | -0.2376877 | -3.5608066 | 0.0000000 |
| C  | -1.3912098 | -1.6789087 | 0.0000000 |
| C  | 1.0732877  | -1.5333139 | 0.0000000 |
| C  | 1.3881380  | -5.0476709 | 0.0000000 |
| N  | 2.0276681  | -3.8958432 | 0.0000000 |
| N  | 0.0226360  | -4.9026244 | 0.0000000 |
| H  | -0.6746718 | -5.6318583 | 0.0000000 |
| N  | -0.2102874 | -0.9834313 | 0.0000000 |
| N  | -1.4621965 | -2.9938462 | 0.0000000 |
| C  | -1.3909754 | 2.5598688  | 0.0000000 |
| C  | -0.2494338 | 4.6908258  | 0.0000000 |
| C  | 0.9510620  | 4.0642312  | 0.0000000 |
| C  | 0.9584905  | 2.6223018  | 0.0000000 |
| N  | -1.3882472 | 3.9556283  | 0.0000000 |
| O  | -2.4708863 | 1.9678443  | 0.0000000 |
| N  | -0.1835009 | 1.9379418  | 0.0000000 |
| N  | -2.5174383 | -0.9391166 | 0.0000000 |
| H  | -2.5083460 | 0.0792766  | 0.0000000 |
| H  | -3.3870767 | -1.4422013 | 0.0000000 |
| O  | 2.0678708  | -0.7976179 | 0.0000000 |
| H  | -0.3460653 | 5.7689188  | 0.0000000 |
| N  | 2.1030820  | 1.9540921  | 0.0000000 |
| H  | 2.9717994  | 2.4630867  | 0.0000000 |
| H  | 2.0969695  | 0.9157493  | 0.0000000 |
| H  | -0.2442075 | 0.0500672  | 0.0000000 |
| H  | -2.2963512 | 4.3999456  | 0.0000000 |
| Cl | 2.4204190  | 4.9566106  | 0.0000000 |
| H  | 1.8573482  | -6.0199141 | 0.0000000 |

### 56 (BrC...G)

|    |            |            |           |
|----|------------|------------|-----------|
| C  | 1.0146886  | -2.9634915 | 0.0000000 |
| C  | -0.2430197 | -3.5646175 | 0.0000000 |
| C  | -1.3960746 | -1.6824894 | 0.0000000 |
| C  | 1.0685829  | -1.5375446 | 0.0000000 |
| C  | 1.3822055  | -5.0521095 | 0.0000000 |
| N  | 2.0221750  | -3.9005015 | 0.0000000 |
| N  | 0.0167590  | -4.9065079 | 0.0000000 |
| H  | -0.6809893 | -5.6353128 | 0.0000000 |
| N  | -0.2149155 | -0.9872674 | 0.0000000 |
| N  | -1.4673550 | -2.9973807 | 0.0000000 |
| C  | -1.3915303 | 2.5556115  | 0.0000000 |
| C  | -0.2553283 | 4.6885182  | 0.0000000 |
| C  | 0.9482612  | 4.0658632  | 0.0000000 |
| C  | 0.9593303  | 2.6233743  | 0.0000000 |
| N  | -1.3923501 | 3.9518947  | 0.0000000 |
| O  | -2.4704596 | 1.9619174  | 0.0000000 |
| N  | -0.1830358 | 1.9372492  | 0.0000000 |
| N  | -2.5220752 | -0.9425001 | 0.0000000 |
| H  | -2.5122400 | 0.0758687  | 0.0000000 |
| H  | -3.3919182 | -1.4452360 | 0.0000000 |
| O  | 2.0632162  | -0.8019653 | 0.0000000 |
| H  | -0.3595422 | 5.7660152  | 0.0000000 |
| N  | 2.1005456  | 1.9496292  | 0.0000000 |
| H  | 2.9730934  | 2.4526009  | 0.0000000 |
| H  | 2.0892596  | 0.9111804  | 0.0000000 |
| H  | -0.2480674 | 0.0461705  | 0.0000000 |
| H  | -2.3015793 | 4.3942916  | 0.0000000 |
| Br | 2.5413535  | 5.0612941  | 0.0000000 |
| H  | 1.8510094  | -6.0245548 | 0.0000000 |

### 57 (IC...G)

|   |            |            |           |
|---|------------|------------|-----------|
| C | 1.0092478  | -2.9681939 | 0.0000000 |
| C | -0.2486238 | -3.5687644 | 0.0000000 |
| C | -1.4008842 | -1.6859291 | 0.0000000 |
| C | 1.0636167  | -1.5422896 | 0.0000000 |
| C | 1.3757485  | -5.0570837 | 0.0000000 |
| N | 2.0162295  | -3.9058278 | 0.0000000 |
| N | 0.0103088  | -4.9108701 | 0.0000000 |
| H | -0.6877327 | -5.6392913 | 0.0000000 |
| N | -0.2194547 | -0.9911524 | 0.0000000 |
| N | -1.4726048 | -3.0008133 | 0.0000000 |
| C | -1.3937542 | 2.5505317  | 0.0000000 |
| C | -0.2610733 | 4.6841704  | 0.0000000 |
| C | 0.9483267  | 4.0685789  | 0.0000000 |
| C | 0.9576632  | 2.6246756  | 0.0000000 |
| N | -1.3967819 | 3.9469283  | 0.0000000 |
| O | -2.4720415 | 1.9556281  | 0.0000000 |
| N | -0.1844948 | 1.9356813  | 0.0000000 |
| I | 2.6822997  | 5.1846861  | 0.0000000 |
| N | -2.5265908 | -0.9457310 | 0.0000000 |
| H | -2.5163159 | 0.0726413  | 0.0000000 |
| H | -3.3966457 | -1.4480718 | 0.0000000 |
| O | 2.0585921  | -0.8071910 | 0.0000000 |
| H | -0.3751869 | 5.7609416  | 0.0000000 |
| N | 2.0946927  | 1.9433440  | 0.0000000 |
| H | 2.9722205  | 2.4379265  | 0.0000000 |
| H | 2.0777507  | 0.9047579  | 0.0000000 |
| H | -0.2519544 | 0.0423690  | 0.0000000 |
| H | -2.3067961 | 4.3881121  | 0.0000000 |
| H | 1.8442387  | -6.0297634 | 0.0000000 |

### 58 (C...FG)

|   |            |            |           |
|---|------------|------------|-----------|
| C | 1.0342308  | -2.9395517 | 0.0000000 |
| C | -0.2220896 | -3.5371843 | 0.0000000 |
| C | -1.3715140 | -1.6548759 | 0.0000000 |
| C | 1.0928659  | -1.5173723 | 0.0000000 |
| C | 1.3962450  | -4.9988730 | 0.0000000 |
| N | 2.0518696  | -3.8834543 | 0.0000000 |
| N | 0.0363271  | -4.8898057 | 0.0000000 |
| H | -0.6400068 | -5.6383950 | 0.0000000 |
| N | -0.1911747 | -0.9636739 | 0.0000000 |
| N | -1.4429679 | -2.9727421 | 0.0000000 |
| C | -1.3733809 | 2.5743104  | 0.0000000 |
| C | -0.2318942 | 4.7039157  | 0.0000000 |
| C | 0.9717989  | 4.0855247  | 0.0000000 |
| C | 0.9653882  | 2.6504132  | 0.0000000 |
| N | -1.3719368 | 3.9707361  | 0.0000000 |
| O | -2.4549187 | 1.9836497  | 0.0000000 |
| N | -0.1677965 | 1.9490394  | 0.0000000 |
| N | -2.4983541 | -0.9180041 | 0.0000000 |
| H | -2.4901833 | 0.1015053  | 0.0000000 |
| H | -3.3671480 | -1.4227077 | 0.0000000 |
| O | 2.0905225  | -0.7862012 | 0.0000000 |
| H | -0.3448783 | 5.7805570  | 0.0000000 |
| N | 2.1127714  | 1.9761995  | 0.0000000 |
| H | 2.9847665  | 2.4767586  | 0.0000000 |
| H | 2.1116016  | 0.9408275  | 0.0000000 |
| H | -0.2223299 | 0.0725050  | 0.0000000 |
| H | -2.2824785 | 4.4087218  | 0.0000000 |
| F | 1.9336364  | -6.2045898 | 0.0000000 |
| H | 1.8910283  | 4.6527674  | 0.0000000 |

### 59 (C...CIG)

|   |            |            |           |
|---|------------|------------|-----------|
| C | 1.0275253  | -2.9306294 | 0.0000000 |
| C | -0.2307950 | -3.5282460 | 0.0000000 |
| C | -1.3770778 | -1.6430236 | 0.0000000 |
| C | 1.0872898  | -1.5052599 | 0.0000000 |
| C | 1.3908035  | -5.0062077 | 0.0000000 |

|    |            |            |           |
|----|------------|------------|-----------|
| N  | 2.0392322  | -3.8690236 | 0.0000000 |
| N  | 0.0267732  | -4.8751706 | 0.0000000 |
| H  | -0.6550216 | -5.6197534 | 0.0000000 |
| N  | -0.1954077 | -0.9513146 | 0.0000000 |
| N  | -1.4512747 | -2.9602422 | 0.0000000 |
| C  | -1.3770892 | 2.5852257  | 0.0000000 |
| C  | -0.2396071 | 4.7164860  | 0.0000000 |
| C  | 0.9654524  | 4.1006139  | 0.0000000 |
| C  | 0.9617159  | 2.6655228  | 0.0000000 |
| N  | -1.3782867 | 3.9814848  | 0.0000000 |
| O  | -2.4574517 | 1.9924369  | 0.0000000 |
| N  | -0.1702693 | 1.9623351  | 0.0000000 |
| N  | -2.5017864 | -0.9038727 | 0.0000000 |
| H  | -2.4918387 | 0.1157794  | 0.0000000 |
| H  | -3.3716365 | -1.4069297 | 0.0000000 |
| O  | 2.0854724  | -0.7765035 | 0.0000000 |
| H  | -0.3549794 | 5.7928277  | 0.0000000 |
| N  | 2.1100750  | 1.9924067  | 0.0000000 |
| H  | 2.9820352  | 2.4930192  | 0.0000000 |
| H  | 2.1094049  | 0.9577041  | 0.0000000 |
| H  | -0.2263777 | 0.0847923  | 0.0000000 |
| H  | -2.2892935 | 4.4185876  | 0.0000000 |
| Cl | 2.0995150  | -6.5537355 | 0.0000000 |
| H  | 1.8828984  | 4.6706902  | 0.0000000 |

## 60 (C...BrG)

|    |            |            |           |
|----|------------|------------|-----------|
| C  | 1.0240421  | -2.9246732 | 0.0000000 |
| C  | -0.2338700 | -3.5238310 | 0.0000000 |
| C  | -1.3814874 | -1.6390853 | 0.0000000 |
| C  | 1.0824869  | -1.4987153 | 0.0000000 |
| C  | 1.3899025  | -5.0010305 | 0.0000000 |
| N  | 2.0367302  | -3.8611951 | 0.0000000 |
| N  | 0.0254793  | -4.8703370 | 0.0000000 |
| H  | -0.6563142 | -5.6151745 | 0.0000000 |
| N  | -0.2003968 | -0.9458744 | 0.0000000 |
| N  | -1.4547081 | -2.9564090 | 0.0000000 |
| C  | -1.3787120 | 2.5911589  | 0.0000000 |
| C  | -0.2395505 | 4.7221684  | 0.0000000 |
| C  | 0.9650419  | 4.1053172  | 0.0000000 |
| C  | 0.9598314  | 2.6701400  | 0.0000000 |
| N  | -1.3788418 | 3.9876641  | 0.0000000 |
| O  | -2.4595187 | 1.9990332  | 0.0000000 |
| N  | -0.1724537 | 1.9672213  | 0.0000000 |
| N  | -2.5069091 | -0.9011639 | 0.0000000 |
| H  | -2.4983411 | 0.1184732  | 0.0000000 |
| H  | -3.3759531 | -1.4057041 | 0.0000000 |
| O  | 2.0805175  | -0.7702040 | 0.0000000 |
| H  | -0.3552349 | 5.7986393  | 0.0000000 |
| N  | 2.1077141  | 1.9965316  | 0.0000000 |
| H  | 2.9798604  | 2.4967480  | 0.0000000 |
| H  | 2.1053119  | 0.9619046  | 0.0000000 |
| H  | -0.2320291 | 0.0904135  | 0.0000000 |
| H  | -2.2893573 | 4.4258439  | 0.0000000 |
| Br | 2.1726765  | -6.6910207 | 0.0000000 |
| H  | 1.8840830  | 4.6731607  | 0.0000000 |

## 61 (C...IG)

|   |            |            |           |
|---|------------|------------|-----------|
| C | 1.0209528  | -2.9205326 | 0.0000000 |
| C | -0.2377961 | -3.5190594 | 0.0000000 |
| C | -1.3842132 | -1.6332625 | 0.0000000 |
| C | 1.0798101  | -1.4937298 | 0.0000000 |
| C | 1.3863632  | -5.0019775 | 0.0000000 |
| N | 2.0319196  | -3.8567128 | 0.0000000 |
| N | 0.0204735  | -4.8646828 | 0.0000000 |
| H | -0.6653868 | -5.6060719 | 0.0000000 |
| N | -0.2026015 | -0.9404603 | 0.0000000 |
| N | -1.4583768 | -2.9503245 | 0.0000000 |
| C | -1.3815095 | 2.5963036  | 0.0000000 |
| C | -0.2435228 | 4.7279410  | 0.0000000 |

|   |            |            |           |
|---|------------|------------|-----------|
| C | 0.9614346  | 4.1117208  | 0.0000000 |
| C | 0.9572693  | 2.6766126  | 0.0000000 |
| N | -1.3823356 | 3.9927684  | 0.0000000 |
| O | -2.4618723 | 2.0034493  | 0.0000000 |
| N | -0.1746245 | 1.9732388  | 0.0000000 |
| I | 2.2583504  | -6.8542218 | 0.0000000 |
| N | -2.5089048 | -0.8942206 | 0.0000000 |
| H | -2.4994042 | 0.1254086  | 0.0000000 |
| H | -3.3783843 | -1.3980386 | 0.0000000 |
| O | 2.0777826  | -0.7654004 | 0.0000000 |
| H | -0.3592416 | 5.8044286  | 0.0000000 |
| N | 2.1062604  | 2.0044179  | 0.0000000 |
| H | 2.9774939  | 2.5064534  | 0.0000000 |
| H | 2.1065973  | 0.9698871  | 0.0000000 |
| H | -0.2335586 | 0.0956722  | 0.0000000 |
| H | -2.2931181 | 4.4303870  | 0.0000000 |
| H | 1.8801428  | 4.6800065  | 0.0000000 |

## 62 (FC...FG)

|   |            |            |           |
|---|------------|------------|-----------|
| C | 1.0270470  | -2.9422415 | 0.0000000 |
| C | -0.2292501 | -3.5413726 | 0.0000000 |
| C | -1.3819538 | -1.6615850 | 0.0000000 |
| C | 1.0836731  | -1.5196660 | 0.0000000 |
| C | 1.3900678  | -5.0017929 | 0.0000000 |
| N | 2.0449243  | -3.8857964 | 0.0000000 |
| N | 0.0301049  | -4.8934842 | 0.0000000 |
| H | -0.6456742 | -5.6427487 | 0.0000000 |
| N | -0.2019227 | -0.9696205 | 0.0000000 |
| N | -1.4513405 | -2.9790797 | 0.0000000 |
| C | -1.3900340 | 2.5767819  | 0.0000000 |
| C | -0.2397838 | 4.7080362  | 0.0000000 |
| C | 0.9420019  | 4.0607750  | 0.0000000 |
| C | 0.9579347  | 2.6272667  | 0.0000000 |
| N | -1.3841451 | 3.9689239  | 0.0000000 |
| O | -2.4689365 | 1.9818991  | 0.0000000 |
| N | -0.1820332 | 1.9458100  | 0.0000000 |
| N | -2.5093068 | -0.9251481 | 0.0000000 |
| H | -2.5025282 | 0.0939366  | 0.0000000 |
| H | -3.3779260 | -1.4301142 | 0.0000000 |
| O | 2.0781480  | -0.7834908 | 0.0000000 |
| H | -0.3198629 | 5.7867390  | 0.0000000 |
| N | 2.1165297  | 1.9800384  | 0.0000000 |
| H | 2.9741492  | 2.5072637  | 0.0000000 |
| H | 2.1282625  | 0.9430491  | 0.0000000 |
| H | -0.2350132 | 0.0646071  | 0.0000000 |
| H | -2.2908885 | 4.4146442  | 0.0000000 |
| F | 2.1099712  | 4.7232665  | 0.0000000 |
| F | 1.9277850  | -6.2068968 | 0.0000000 |

## 63 (CIC...CIG)

|   |            |            |           |
|---|------------|------------|-----------|
| C | 1.0093209  | -2.9391753 | 0.0000000 |
| C | -0.2484044 | -3.5389572 | 0.0000000 |
| C | -1.3987630 | -1.6564159 | 0.0000000 |
| C | 1.0660567  | -1.5140820 | 0.0000000 |
| C | 1.3756258  | -5.0142750 | 0.0000000 |
| N | 2.0222800  | -3.8759998 | 0.0000000 |
| N | 0.0112466  | -4.8851369 | 0.0000000 |
| H | -0.6700280 | -5.6302903 | 0.0000000 |
| N | -0.2178498 | -0.9631651 | 0.0000000 |
| N | -1.4700593 | -2.9733239 | 0.0000000 |
| C | -1.3999746 | 2.5779281  | 0.0000000 |
| C | -0.2594189 | 4.7093029  | 0.0000000 |
| C | 0.9415068  | 4.0835532  | 0.0000000 |
| C | 0.9494425  | 2.6418727  | 0.0000000 |
| N | -1.3979439 | 3.9734129  | 0.0000000 |
| O | -2.4790911 | 1.9842948  | 0.0000000 |
| N | -0.1920450 | 1.9564829  | 0.0000000 |
| N | -2.5247606 | -0.9189266 | 0.0000000 |
| H | -2.5169198 | 0.1001077  | 0.0000000 |

|    |            |            |           |
|----|------------|------------|-----------|
| H  | -3.3938731 | -1.4232975 | 0.0000000 |
| O  | 2.0620069  | -0.7815024 | 0.0000000 |
| H  | -0.3568892 | 5.7873225  | 0.0000000 |
| N  | 2.0945191  | 1.9745323  | 0.0000000 |
| H  | 2.9630084  | 2.4838459  | 0.0000000 |
| H  | 2.0896411  | 0.9372098  | 0.0000000 |
| H  | -0.2504650 | 0.0713125  | 0.0000000 |
| H  | -2.3059387 | 4.4181212  | 0.0000000 |
| Cl | 2.0869159  | -6.5602061 | 0.0000000 |
| Cl | 2.4108537  | 4.9754545  | 0.0000000 |

#### 64 (BrC...BrG)

|    |            |            |           |
|----|------------|------------|-----------|
| C  | 1.0016279  | -2.9387418 | 0.0000000 |
| C  | -0.2566264 | -3.5381292 | 0.0000000 |
| C  | -1.4059814 | -1.6547704 | 0.0000000 |
| C  | 1.0589856  | -1.5130443 | 0.0000000 |
| C  | 1.3670524  | -5.0154525 | 0.0000000 |
| N  | 2.0139898  | -3.8755503 | 0.0000000 |
| N  | 0.0025187  | -4.8842277 | 0.0000000 |
| H  | -0.6803074 | -5.6282056 | 0.0000000 |
| N  | -0.2246137 | -0.9616670 | 0.0000000 |
| N  | -1.4779484 | -2.9715867 | 0.0000000 |
| C  | -1.4029532 | 2.5784857  | 0.0000000 |
| C  | -0.2678356 | 4.7117213  | 0.0000000 |
| C  | 0.9363361  | 4.0902381  | 0.0000000 |
| C  | 0.9479903  | 2.6480400  | 0.0000000 |
| N  | -1.4046195 | 3.9744752  | 0.0000000 |
| O  | -2.4808844 | 1.9827605  | 0.0000000 |
| N  | -0.1938505 | 1.9608476  | 0.0000000 |
| N  | -2.5314998 | -0.9169426 | 0.0000000 |
| H  | -2.5230558 | 0.1021314  | 0.0000000 |
| H  | -3.4008307 | -1.4209911 | 0.0000000 |
| O  | 2.0551771  | -0.7812837 | 0.0000000 |
| H  | -0.3729890 | 5.7890968  | 0.0000000 |
| N  | 2.0897319  | 1.9751578  | 0.0000000 |
| H  | 2.9620346  | 2.4784809  | 0.0000000 |
| H  | 2.0796939  | 0.9378576  | 0.0000000 |
| H  | -0.2565437 | 0.0727835  | 0.0000000 |
| H  | -2.3135572 | 4.4176864  | 0.0000000 |
| Br | 2.1499071  | -6.7051107 | 0.0000000 |
| Br | 2.5290514  | 5.0859407  | 0.0000000 |

#### 65 (IC...IG)

|   |            |            |           |
|---|------------|------------|-----------|
| C | 0.9931804  | -2.9381762 | 0.0000000 |
| C | -0.2656538 | -3.5371206 | 0.0000000 |
| C | -1.4137727 | -1.6525585 | 0.0000000 |
| C | 1.0507992  | -1.5117745 | 0.0000000 |
| C | 1.3586435  | -5.0197146 | 0.0000000 |
| N | 2.0041479  | -3.8743525 | 0.0000000 |
| N | -0.0073486 | -4.8823347 | 0.0000000 |
| H | -0.6935467 | -5.6234572 | 0.0000000 |
| N | -0.2320484 | -0.9593880 | 0.0000000 |
| N | -1.4865683 | -2.9691535 | 0.0000000 |
| C | -1.4082894 | 2.5795022  | 0.0000000 |
| C | -0.2762989 | 4.7133587  | 0.0000000 |
| C | 0.9334906  | 4.0984688  | 0.0000000 |
| C | 0.9431090  | 2.6548454  | 0.0000000 |
| N | -1.4118358 | 3.9756123  | 0.0000000 |
| O | -2.4859482 | 1.9830468  | 0.0000000 |
| N | -0.1985897 | 1.9649043  | 0.0000000 |
| I | 2.6669976  | 5.2151364  | 0.0000000 |
| I | 2.2304602  | -6.8718343 | 0.0000000 |
| N | -2.5388867 | -0.9143217 | 0.0000000 |
| H | -2.5299173 | 0.1047630  | 0.0000000 |
| H | -3.4082328 | -1.4183194 | 0.0000000 |
| O | 2.0476193  | -0.7811252 | 0.0000000 |
| H | -0.3908621 | 5.7901092  | 0.0000000 |
| N | 2.0808395  | 1.9744431  | 0.0000000 |
| H | 2.9580531  | 2.4696246  | 0.0000000 |

|   |            |           |           |
|---|------------|-----------|-----------|
| H | 2.0654788  | 0.9370511 | 0.0000000 |
| H | -0.2634011 | 0.0752689 | 0.0000000 |
| H | -2.3216184 | 4.4174961 | 0.0000000 |

## Binding mode b

### 66 (C...G)

|   |            |            |           |
|---|------------|------------|-----------|
| C | 1.3493321  | -1.4300089 | 0.0000000 |
| C | 0.6750873  | -2.6464359 | 0.0000000 |
| C | 2.4848327  | -3.9111776 | 0.0000000 |
| C | 2.7818100  | -1.4329799 | 0.0000000 |
| C | -0.7291116 | -0.9440475 | 0.0000000 |
| N | 0.4672517  | -0.3791853 | 0.0000000 |
| N | -0.6482926 | -2.3100313 | 0.0000000 |
| H | -1.4220298 | -2.9584980 | 0.0000000 |
| N | 3.2496844  | -2.7758845 | 0.0000000 |
| N | 1.1781170  | -3.9066899 | 0.0000000 |
| C | -3.3263069 | 2.2169308  | 0.0000000 |
| C | -2.7643565 | 4.5811380  | 0.0000000 |
| C | -1.4417826 | 4.2902013  | 0.0000000 |
| C | -1.0910340 | 2.8964654  | 0.0000000 |
| H | -4.6688336 | 3.7747019  | 0.0000000 |
| N | -3.6773942 | 3.5818341  | 0.0000000 |
| O | -4.2192336 | 1.3787747  | 0.0000000 |
| N | -1.9936731 | 1.9277884  | 0.0000000 |
| N | 3.1485478  | -5.0976273 | 0.0000000 |
| H | 4.1488977  | -5.1589326 | 0.0000000 |
| H | 2.5963541  | -5.9366574 | 0.0000000 |
| O | 3.5792068  | -0.5105248 | 0.0000000 |
| H | -3.1486988 | 5.5937961  | 0.0000000 |
| N | 0.2009830  | 2.5404700  | 0.0000000 |
| H | 0.9206521  | 3.2412764  | 0.0000000 |
| H | 0.4456958  | 1.5430068  | 0.0000000 |
| H | 4.2604437  | -2.8473724 | 0.0000000 |
| H | -1.6598302 | -0.3926033 | 0.0000000 |
| H | -0.6963187 | 5.0722726  | 0.0000000 |

### 67 (FC...G)

|   |            |            |           |
|---|------------|------------|-----------|
| C | -0.0598969 | -2.0162866 | 0.0000000 |
| C | -0.3386200 | -3.3794998 | 0.0000000 |
| C | 1.7645364  | -4.0482109 | 0.0000000 |
| C | 1.3108828  | -1.5993850 | 0.0000000 |
| C | -2.1800675 | -2.1722355 | 0.0000000 |
| N | -1.2154530 | -1.2726031 | 0.0000000 |
| N | -1.7020039 | -3.4559495 | 0.0000000 |
| H | -2.2415822 | -4.3093470 | 0.0000000 |
| N | 2.1550750  | -2.7359417 | 0.0000000 |
| N | 0.5144224  | -4.4319736 | 0.0000000 |
| C | -2.2743873 | 4.5826760  | 0.0000000 |
| C | 0.0924325  | 5.1816610  | 0.0000000 |
| C | 0.4106537  | 3.8729092  | 0.0000000 |
| C | -0.6455238 | 2.9008365  | 0.0000000 |
| H | -1.5098952 | 6.4908933  | 0.0000000 |
| N | -1.2244867 | 5.5224514  | 0.0000000 |
| O | -3.4259813 | 4.9928729  | 0.0000000 |
| N | -1.9148665 | 3.2599039  | 0.0000000 |
| N | 2.7503953  | -4.9800665 | 0.0000000 |
| H | 3.7238638  | -4.7398007 | 0.0000000 |
| H | 2.4750255  | -5.9462836 | 0.0000000 |
| O | 1.8062225  | -0.4817133 | 0.0000000 |
| H | 0.8356315  | 5.9680155  | 0.0000000 |
| N | -0.3146853 | 1.6073219  | 0.0000000 |
| H | 0.6442136  | 1.2904078  | 0.0000000 |
| H | -1.0335712 | 0.8935368  | 0.0000000 |
| H | 3.1413426  | -2.5017469 | 0.0000000 |
| F | 1.6926047  | 3.4581202  | 0.0000000 |
| H | -3.2362815 | -1.9505626 | 0.0000000 |

**68 (ClC...G)**

|    |            |            |           |
|----|------------|------------|-----------|
| C  | -0.0807455 | -2.0154841 | 0.0000000 |
| C  | -0.3541217 | -3.3799559 | 0.0000000 |
| C  | 1.7513981  | -4.0411003 | 0.0000000 |
| C  | 1.2886797  | -1.5940016 | 0.0000000 |
| C  | -2.2001171 | -2.1798007 | 0.0000000 |
| N  | -1.2392101 | -1.2761575 | 0.0000000 |
| N  | -1.7171154 | -3.4617121 | 0.0000000 |
| H  | -2.2532948 | -4.3172926 | 0.0000000 |
| N  | 2.1368403  | -2.7274313 | 0.0000000 |
| N  | 0.5027053  | -4.4293949 | 0.0000000 |
| C  | -2.2821557 | 4.5734344  | 0.0000000 |
| C  | 0.0763664  | 5.1883811  | 0.0000000 |
| C  | 0.4270207  | 3.8807458  | 0.0000000 |
| C  | -0.6374521 | 2.9053662  | 0.0000000 |
| H  | -1.5256950 | 6.4894792  | 0.0000000 |
| N  | -1.2349043 | 5.5219755  | 0.0000000 |
| O  | -3.4340913 | 4.9811876  | 0.0000000 |
| N  | -1.9108572 | 3.2591401  | 0.0000000 |
| N  | 2.7410671  | -4.9690246 | 0.0000000 |
| H  | 3.7135358  | -4.7246555 | 0.0000000 |
| H  | 2.4699247  | -5.9363852 | 0.0000000 |
| O  | 1.7808486  | -0.4747403 | 0.0000000 |
| H  | 0.8050204  | 5.9893833  | 0.0000000 |
| N  | -0.3286786 | 1.6080016  | 0.0000000 |
| H  | 0.6226121  | 1.2675893  | 0.0000000 |
| H  | -1.0648042 | 0.9122941  | 0.0000000 |
| H  | 3.1222245  | -2.4895351 | 0.0000000 |
| Cl | 2.0823969  | 3.4026242  | 0.0000000 |
| H  | -3.2573973 | -1.9629307 | 0.0000000 |

**69 (BrC...G)**

|    |            |            |           |
|----|------------|------------|-----------|
| C  | 0.4690710  | -1.8634494 | 0.0000000 |
| C  | 0.1690347  | -3.2200172 | 0.0000000 |
| C  | 2.2655093  | -3.9112225 | 0.0000000 |
| C  | 1.8414683  | -1.4551175 | 0.0000000 |
| C  | -1.6549543 | -1.9817325 | 0.0000000 |
| N  | -0.6717111 | -1.1025620 | 0.0000000 |
| N  | -1.1965766 | -3.2730411 | 0.0000000 |
| H  | -1.7515102 | -4.1165614 | 0.0000000 |
| N  | 2.6742907  | -2.6034074 | 0.0000000 |
| N  | 1.0111368  | -4.2819309 | 0.0000000 |
| C  | -3.0915531 | 3.5874619  | 0.0000000 |
| C  | -1.2507363 | 5.1829135  | 0.0000000 |
| C  | -0.3557183 | 4.1655971  | 0.0000000 |
| C  | -0.8759660 | 2.8184342  | 0.0000000 |
| H  | -3.2622596 | 5.6420139  | 0.0000000 |
| N  | -2.5733001 | 4.9027171  | 0.0000000 |
| O  | -4.3052211 | 3.4431498  | 0.0000000 |
| N  | -2.1770655 | 2.5750606  | 0.0000000 |
| N  | 3.2394160  | -4.8567391 | 0.0000000 |
| H  | 4.2160939  | -4.6303148 | 0.0000000 |
| H  | 2.9504955  | -5.8190094 | 0.0000000 |
| O  | 2.3340815  | -0.3381876 | 0.0000000 |
| H  | -0.9568942 | 6.2252141  | 0.0000000 |
| N  | -0.0392769 | 1.7802020  | 0.0000000 |
| H  | 0.9604305  | 1.8993168  | 0.0000000 |
| H  | -0.4193978 | 0.8324087  | 0.0000000 |
| H  | 3.6638231  | -2.3840699 | 0.0000000 |
| Br | 1.4933880  | 4.5196069  | 0.0000000 |
| H  | -2.7060983 | -1.7367337 | 0.0000000 |

**70 (IC...G)**

|   |            |            |           |
|---|------------|------------|-----------|
| C | 1.2924992  | -1.4543103 | 0.0000000 |
| C | 0.6289054  | -2.6761727 | 0.0000000 |
| C | 2.4503037  | -3.9239934 | 0.0000000 |
| C | 2.7249874  | -1.4435666 | 0.0000000 |
| C | -0.7901340 | -0.9860723 | 0.0000000 |



|   |            |            |           |
|---|------------|------------|-----------|
| N | 0.4015027  | -0.4113233 | 0.0000000 |
| N | -0.6975283 | -2.3510649 | 0.0000000 |
| H | -1.4653781 | -3.0064934 | 0.0000000 |
| N | 3.2051203  | -2.7818256 | 0.0000000 |
| N | 1.1433247  | -3.9315257 | 0.0000000 |
| C | -3.3226990 | 2.1945806  | 0.0000000 |
| C | -2.7607294 | 4.5573763  | 0.0000000 |
| C | -1.4354204 | 4.2629435  | 0.0000000 |
| C | -1.0703461 | 2.8650360  | 0.0000000 |
| H | -4.6641296 | 3.7600059  | 0.0000000 |
| N | -3.6731909 | 3.5595469  | 0.0000000 |
| O | -4.2131630 | 1.3548171  | 0.0000000 |
| N | -1.9907449 | 1.9115265  | 0.0000000 |
| I | -0.0369673 | 5.7814749  | 0.0000000 |
| N | 3.1246692  | -5.1040211 | 0.0000000 |
| H | 4.1256587  | -5.1561644 | 0.0000000 |
| H | 2.5802557  | -5.9481790 | 0.0000000 |
| O | 3.5122071  | -0.5126833 | 0.0000000 |
| H | -3.1390064 | 5.5722815  | 0.0000000 |
| N | 0.2100422  | 2.4917535  | 0.0000000 |
| H | 0.9433086  | 3.1805461  | 0.0000000 |
| H | 0.4263249  | 1.4846825  | 0.0000000 |
| H | 4.2165122  | -2.8446158 | 0.0000000 |
| H | -1.7261847 | -0.4445595 | 0.0000000 |

## 71 (C...FG)

|   |            |            |           |
|---|------------|------------|-----------|
| C | 0.1039596  | -2.1341637 | 0.0000000 |
| C | 0.3610892  | -3.4988755 | 0.0000000 |
| C | 2.5594245  | -3.3218074 | 0.0000000 |
| C | 1.2093898  | -1.2330024 | 0.0000000 |
| C | -1.7727737 | -3.0567631 | 0.0000000 |
| N | -1.2546232 | -1.8680433 | 0.0000000 |
| N | -0.8802641 | -4.0881414 | 0.0000000 |
| H | -1.0881378 | -5.0763506 | 0.0000000 |
| N | 2.4224247  | -1.9602143 | 0.0000000 |
| N | 1.5448600  | -4.1495429 | 0.0000000 |
| C | -2.6958470 | 4.6642249  | 0.0000000 |
| C | -0.2585247 | 4.7191621  | 0.0000000 |
| C | -0.2060386 | 3.3666367  | 0.0000000 |
| C | -1.4711084 | 2.6833597  | 0.0000000 |
| H | -1.5259967 | 6.3538863  | 0.0000000 |
| N | -1.4582557 | 5.3464023  | 0.0000000 |
| O | -3.7224647 | 5.3277107  | 0.0000000 |
| N | -2.6399089 | 3.2984776  | 0.0000000 |
| N | 3.8225082  | -3.8143951 | 0.0000000 |
| H | 4.6346437  | -3.2261454 | 0.0000000 |
| H | 3.9311671  | -4.8134120 | 0.0000000 |
| O | 1.2328870  | -0.0078970 | 0.0000000 |
| H | 0.6228072  | 5.3491351  | 0.0000000 |
| N | -1.4598725 | 1.3410793  | 0.0000000 |
| H | -0.5926536 | 0.8214561  | 0.0000000 |
| H | -2.3370291 | 0.8470078  | 0.0000000 |
| H | 3.2458860  | -1.3688252 | 0.0000000 |
| H | 0.7308060  | 2.8283887  | 0.0000000 |
| F | -3.0583543 | -3.3293481 | 0.0000000 |

## 72 (C...CIG)

|   |            |            |           |
|---|------------|------------|-----------|
| C | 0.5152885  | -1.8726664 | 0.0000000 |
| C | 0.2180713  | -3.2297088 | 0.0000000 |
| C | 2.3142814  | -3.9166118 | 0.0000000 |
| C | 1.8854212  | -1.4606843 | 0.0000000 |
| C | -1.5978752 | -1.9908086 | 0.0000000 |
| N | -0.6261286 | -1.1080867 | 0.0000000 |
| N | -1.1504550 | -3.2856930 | 0.0000000 |
| H | -1.7223975 | -4.1184478 | 0.0000000 |
| N | 2.7193395  | -2.6085811 | 0.0000000 |
| N | 1.0593481  | -4.2895254 | 0.0000000 |
| C | -3.0420317 | 3.5930009  | 0.0000000 |
| C | -1.1995128 | 5.1874196  | 0.0000000 |

|    |            |            |           |
|----|------------|------------|-----------|
| C  | -0.2983469 | 4.1767762  | 0.0000000 |
| C  | -0.8348609 | 2.8429807  | 0.0000000 |
| H  | -3.2161895 | 5.6428013  | 0.0000000 |
| N  | -2.5229548 | 4.9085257  | 0.0000000 |
| O  | -4.2568280 | 3.4517029  | 0.0000000 |
| N  | -2.1306890 | 2.5773076  | 0.0000000 |
| N  | 3.2890897  | -4.8602922 | 0.0000000 |
| H  | 4.2651210  | -4.6310146 | 0.0000000 |
| H  | 3.0031110  | -5.8234927 | 0.0000000 |
| O  | 2.3772910  | -0.3432258 | 0.0000000 |
| H  | -0.9190123 | 6.2336854  | 0.0000000 |
| N  | 0.0088282  | 1.8012500  | 0.0000000 |
| H  | 1.0071109  | 1.9183163  | 0.0000000 |
| H  | -0.3670775 | 0.8557152  | 0.0000000 |
| H  | 3.7083355  | -2.3865166 | 0.0000000 |
| H  | 0.7645635  | 4.3701166  | 0.0000000 |
| Cl | -3.2508410 | -1.6342422 | 0.0000000 |

### 73 (C...BrG)

|    |            |            |           |
|----|------------|------------|-----------|
| C  | 0.5223383  | -1.8740686 | 0.0000000 |
| C  | 0.2247356  | -3.2313673 | 0.0000000 |
| C  | 2.3217673  | -3.9176369 | 0.0000000 |
| C  | 1.8930568  | -1.4622238 | 0.0000000 |
| C  | -1.5929700 | -1.9927228 | 0.0000000 |
| N  | -0.6188472 | -1.1098640 | 0.0000000 |
| N  | -1.1434919 | -3.2873174 | 0.0000000 |
| H  | -1.7146295 | -4.1210158 | 0.0000000 |
| N  | 2.7273612  | -2.6095827 | 0.0000000 |
| N  | 1.0669652  | -4.2904839 | 0.0000000 |
| C  | -3.0382770 | 3.5911728  | 0.0000000 |
| C  | -1.1961541 | 5.1859862  | 0.0000000 |
| C  | -0.2949139 | 4.1756128  | 0.0000000 |
| C  | -0.8311317 | 2.8417158  | 0.0000000 |
| H  | -3.2130015 | 5.6409965  | 0.0000000 |
| N  | -2.5196801 | 4.9067838  | 0.0000000 |
| O  | -4.2530148 | 3.4493809  | 0.0000000 |
| N  | -2.1270109 | 2.5756078  | 0.0000000 |
| N  | 3.2960633  | -4.8615306 | 0.0000000 |
| H  | 4.2724310  | -4.6333698 | 0.0000000 |
| H  | 3.0086274  | -5.8243339 | 0.0000000 |
| O  | 2.3843035  | -0.3444816 | 0.0000000 |
| H  | -0.9164974 | 6.2326594  | 0.0000000 |
| N  | 0.0121525  | 1.7997575  | 0.0000000 |
| H  | 1.0105136  | 1.9164841  | 0.0000000 |
| H  | -0.3637280 | 0.8541486  | 0.0000000 |
| H  | 3.7164689  | -2.3878341 | 0.0000000 |
| Br | -3.4014444 | -1.5916306 | 0.0000000 |
| H  | 0.7680078  | 4.3691575  | 0.0000000 |

### 74 (C...IG)

|   |            |            |           |
|---|------------|------------|-----------|
| C | 0.9623352  | -1.6460956 | 0.0000000 |
| C | 0.6552183  | -3.0013330 | 0.0000000 |
| C | 2.7493709  | -3.6996150 | 0.0000000 |
| C | 2.3349521  | -1.2415788 | 0.0000000 |
| C | -1.1625772 | -1.7484790 | 0.0000000 |
| N | -0.1713012 | -0.8744868 | 0.0000000 |
| N | -0.7112671 | -3.0455986 | 0.0000000 |
| H | -1.2885120 | -3.8751551 | 0.0000000 |
| N | 3.1636731  | -2.3939721 | 0.0000000 |
| N | 1.4932248  | -4.0655817 | 0.0000000 |
| C | -3.4202352 | 2.7107063  | 0.0000000 |
| C | -2.2546791 | 4.8459652  | 0.0000000 |
| C | -1.0552336 | 4.2162353  | 0.0000000 |
| C | -1.0887027 | 2.7796531  | 0.0000000 |
| H | -4.3039473 | 4.5694687  | 0.0000000 |
| N | -3.3983926 | 4.1223662  | 0.0000000 |
| O | -4.5067807 | 2.1434699  | 0.0000000 |
| N | -2.2124744 | 2.0819476  | 0.0000000 |
| I | -3.1493506 | -1.2893291 | 0.0000000 |

|   |            |            |           |
|---|------------|------------|-----------|
| N | 3.7194679  | -4.6496385 | 0.0000000 |
| H | 4.6968535  | -4.4266415 | 0.0000000 |
| H | 3.4265226  | -5.6106471 | 0.0000000 |
| O | 2.8293862  | -0.1256127 | 0.0000000 |
| H | -2.3583224 | 5.9242948  | 0.0000000 |
| N | 0.0597257  | 2.0882119  | 0.0000000 |
| H | 0.9517159  | 2.5502845  | 0.0000000 |
| H | 0.0143049  | 1.0673685  | 0.0000000 |
| H | 4.1540556  | -2.1786296 | 0.0000000 |
| H | -0.1290305 | 4.7724221  | 0.0000000 |

## 75 (FC...FG)

|   |            |            |           |
|---|------------|------------|-----------|
| C | -0.0582564 | -2.0389713 | 0.0000000 |
| C | -0.3254936 | -3.4018805 | 0.0000000 |
| C | 1.7797708  | -4.0566541 | 0.0000000 |
| C | 1.3052055  | -1.6105595 | 0.0000000 |
| C | -2.1482369 | -2.2058498 | 0.0000000 |
| N | -1.2258050 | -1.2935840 | 0.0000000 |
| N | -1.6972508 | -3.4914471 | 0.0000000 |
| H | -2.2544106 | -4.3336821 | 0.0000000 |
| N | 2.1582807  | -2.7429026 | 0.0000000 |
| N | 0.5299092  | -4.4474138 | 0.0000000 |
| C | -2.2615745 | 4.6092444  | 0.0000000 |
| C | 0.1080857  | 5.1972049  | 0.0000000 |
| C | 0.4208248  | 3.8868912  | 0.0000000 |
| C | -0.6401021 | 2.9206588  | 0.0000000 |
| H | -1.4880886 | 6.5135775  | 0.0000000 |
| N | -1.2070079 | 5.5438407  | 0.0000000 |
| O | -3.4110074 | 5.0241230  | 0.0000000 |
| N | -1.9070511 | 3.2848360  | 0.0000000 |
| N | 2.7684121  | -4.9845471 | 0.0000000 |
| H | 3.7412043  | -4.7408131 | 0.0000000 |
| H | 2.4969469  | -5.9520454 | 0.0000000 |
| O | 1.7913543  | -0.4886552 | 0.0000000 |
| H | 0.8542799  | 5.9807854  | 0.0000000 |
| N | -0.3184289 | 1.6234191  | 0.0000000 |
| H | 0.6368037  | 1.2962916  | 0.0000000 |
| H | -1.0496484 | 0.9243638  | 0.0000000 |
| H | 3.1423920  | -2.4994017 | 0.0000000 |
| F | 1.7008260  | 3.4661867  | 0.0000000 |
| F | -3.4419340 | -1.9830159 | 0.0000000 |

## 76 (CIC...CIG)

|   |            |            |           |
|---|------------|------------|-----------|
| C | -0.0567127 | -2.0369188 | 0.0000000 |
| C | -0.3255046 | -3.4015005 | 0.0000000 |
| C | 1.7811596  | -4.0552260 | 0.0000000 |
| C | 1.3095954  | -1.6090019 | 0.0000000 |
| C | -2.1642518 | -2.2035085 | 0.0000000 |
| N | -1.2170285 | -1.2947528 | 0.0000000 |
| N | -1.6916204 | -3.4881582 | 0.0000000 |
| H | -2.2439016 | -4.3342876 | 0.0000000 |
| N | 2.1618249  | -2.7408394 | 0.0000000 |
| N | 0.5319872  | -4.4467856 | 0.0000000 |
| C | -2.2611276 | 4.5997013  | 0.0000000 |
| C | 0.1020337  | 5.1967992  | 0.0000000 |
| C | 0.4430211  | 3.8863670  | 0.0000000 |
| C | -0.6288061 | 2.9197711  | 0.0000000 |
| H | -1.4899570 | 6.5099414  | 0.0000000 |
| N | -1.2065122 | 5.5401427  | 0.0000000 |
| O | -3.4097591 | 5.0155857  | 0.0000000 |
| N | -1.8990012 | 3.2823617  | 0.0000000 |
| N | 2.7701778  | -4.9824418 | 0.0000000 |
| H | 3.7428465  | -4.7384885 | 0.0000000 |
| H | 2.4990803  | -5.9500972 | 0.0000000 |
| O | 1.7944365  | -0.4870100 | 0.0000000 |
| H | 0.8364550  | 5.9924800  | 0.0000000 |
| N | -0.3306559 | 1.6186797  | 0.0000000 |
| H | 0.6175322  | 1.2703163  | 0.0000000 |
| H | -1.0762640 | 0.9346256  | 0.0000000 |

|    |            |            |           |
|----|------------|------------|-----------|
| H  | 3.1464637  | -2.4992427 | 0.0000000 |
| Cl | -3.8300872 | -1.8937509 | 0.0000000 |
| Cl | 2.0945761  | 3.3952388  | 0.0000000 |

### 77 (BrC...BrG)

|    |            |            |           |
|----|------------|------------|-----------|
| C  | 0.4944980  | -1.8786845 | 0.0000000 |
| C  | 0.1970233  | -3.2357253 | 0.0000000 |
| C  | 2.2942446  | -3.9218965 | 0.0000000 |
| C  | 1.8653259  | -1.4663374 | 0.0000000 |
| C  | -1.6211469 | -1.9976050 | 0.0000000 |
| N  | -0.6469260 | -1.1142491 | 0.0000000 |
| N  | -1.1714641 | -3.2917545 | 0.0000000 |
| H  | -1.7422776 | -4.1256964 | 0.0000000 |
| N  | 2.6999186  | -2.6137932 | 0.0000000 |
| N  | 1.0391682  | -4.2947346 | 0.0000000 |
| C  | -3.0652955 | 3.5869475  | 0.0000000 |
| C  | -1.2271721 | 5.1857892  | 0.0000000 |
| C  | -0.3300981 | 4.1701596  | 0.0000000 |
| C  | -0.8486476 | 2.8228719  | 0.0000000 |
| H  | -3.2390338 | 5.6415905  | 0.0000000 |
| N  | -2.5490856 | 4.9031892  | 0.0000000 |
| O  | -4.2783331 | 3.4397480  | 0.0000000 |
| N  | -2.1483446 | 2.5764949  | 0.0000000 |
| N  | 3.2681424  | -4.8660028 | 0.0000000 |
| H  | 4.2446371  | -4.6382726 | 0.0000000 |
| H  | 2.9806730  | -5.8288579 | 0.0000000 |
| O  | 2.3544642  | -0.3481423 | 0.0000000 |
| H  | -0.9350276 | 6.2284883  | 0.0000000 |
| N  | -0.0101283 | 1.7849737  | 0.0000000 |
| H  | 0.9895012  | 1.9035997  | 0.0000000 |
| H  | -0.3922585 | 0.8400238  | 0.0000000 |
| H  | 3.6891182  | -2.3920934 | 0.0000000 |
| Br | 1.5183940  | 4.5270254  | 0.0000000 |
| Br | -3.4298689 | -1.5970561 | 0.0000000 |

### 78 (IC...IG)

|   |            |            |           |
|---|------------|------------|-----------|
| C | 0.9329296  | -1.6629553 | 0.0000000 |
| C | 0.6259125  | -3.0179940 | 0.0000000 |
| C | 2.7201339  | -3.7161862 | 0.0000000 |
| C | 2.3057207  | -1.2582576 | 0.0000000 |
| C | -1.1923589 | -1.7659721 | 0.0000000 |
| N | -0.2011460 | -0.8914617 | 0.0000000 |
| N | -0.7408192 | -3.0625448 | 0.0000000 |
| H | -1.3173556 | -3.8925797 | 0.0000000 |
| N | 3.1345676  | -2.4105995 | 0.0000000 |
| N | 1.4637070  | -4.0821308 | 0.0000000 |
| C | -3.4463096 | 2.6921822  | 0.0000000 |
| C | -2.2884389 | 4.8303277  | 0.0000000 |
| C | -1.0856628 | 4.2000611  | 0.0000000 |
| C | -1.1006137 | 2.7558982  | 0.0000000 |
| H | -4.3333512 | 4.5546762  | 0.0000000 |
| N | -3.4283858 | 4.1038600  | 0.0000000 |
| O | -4.5291841 | 2.1203355  | 0.0000000 |
| N | -2.2348025 | 2.0731389  | 0.0000000 |
| I | 0.6622423  | 5.2989592  | 0.0000000 |
| I | -3.1788951 | -1.3059105 | 0.0000000 |
| N | 3.6895758  | -4.6663802 | 0.0000000 |
| H | 4.6672067  | -4.4441841 | 0.0000000 |
| H | 3.3955796  | -5.6270978 | 0.0000000 |
| O | 2.7987187  | -0.1419723 | 0.0000000 |
| H | -2.3888674 | 5.9088139  | 0.0000000 |
| N | 0.0365259  | 2.0576178  | 0.0000000 |
| H | 0.9350189  | 2.5101336  | 0.0000000 |
| H | -0.0266859 | 1.0355122  | 0.0000000 |
| H | 4.1250374  | -2.1952901 | 0.0000000 |

## Binding mode c

### 79 (C...G)

|   |            |            |           |
|---|------------|------------|-----------|
| C | 2.0751401  | 0.3289242  | 0.0000000 |
| C | 3.4404046  | 0.5989806  | 0.0000000 |
| C | 3.2430538  | 2.7975103  | 0.0000000 |
| C | 1.1640946  | 1.4319279  | 0.0000000 |
| C | 3.0340119  | -1.5639685 | 0.0000000 |
| N | 1.8311009  | -1.0232208 | 0.0000000 |
| N | 4.0367510  | -0.6287199 | 0.0000000 |
| H | 5.0322313  | -0.7977436 | 0.0000000 |
| N | 1.8809535  | 2.6497881  | 0.0000000 |
| N | 4.0799445  | 1.7930947  | 0.0000000 |
| C | -4.2618867 | -3.1944630 | 0.0000000 |
| C | -4.8338687 | -0.8248509 | 0.0000000 |
| C | -3.5232766 | -0.4869698 | 0.0000000 |
| C | -2.5850574 | -1.5769053 | 0.0000000 |
| H | -6.1622073 | -2.4102519 | 0.0000000 |
| N | -5.1921170 | -2.1301846 | 0.0000000 |
| O | -4.6930667 | -4.3386092 | 0.0000000 |
| N | -2.9398235 | -2.8502700 | 0.0000000 |
| N | 3.7210978  | 4.0671340  | 0.0000000 |
| H | 3.1237196  | 4.8723820  | 0.0000000 |
| H | 4.7187412  | 4.1868362  | 0.0000000 |
| O | -0.0607434 | 1.4520632  | 0.0000000 |
| H | -5.6362648 | -0.0970134 | 0.0000000 |
| N | -1.2771022 | -1.2832903 | 0.0000000 |
| H | -0.9373432 | -0.3301998 | 0.0000000 |
| H | -0.6022631 | -2.0309348 | 0.0000000 |
| H | 1.2834270  | 3.4685873  | 0.0000000 |
| H | 3.2399632  | -2.6234923 | 0.0000000 |
| H | -3.1996145 | 0.5438595  | 0.0000000 |

### 80 (FC...G)

|   |            |            |           |
|---|------------|------------|-----------|
| C | 3.2471344  | -0.3721541 | 0.0000000 |
| C | 3.8412809  | 0.8879587  | 0.0000000 |
| C | 1.9577877  | 2.0353455  | 0.0000000 |
| C | 1.8193166  | -0.4450886 | 0.0000000 |
| C | 5.3368385  | -0.7257398 | 0.0000000 |
| N | 4.1885123  | -1.3720969 | 0.0000000 |
| N | 5.1830598  | 0.6383357  | 0.0000000 |
| H | 5.9096899  | 1.3389664  | 0.0000000 |
| N | 1.2673642  | 0.8541098  | 0.0000000 |
| N | 3.2630700  | 2.1135738  | 0.0000000 |
| C | -5.2045008 | -1.7693060 | 0.0000000 |
| C | -4.1043972 | 0.4066177  | 0.0000000 |
| C | -2.9086476 | -0.2136008 | 0.0000000 |
| C | -2.8597768 | -1.6470261 | 0.0000000 |
| H | -6.1427607 | 0.0651812  | 0.0000000 |
| N | -5.2250020 | -0.3569677 | 0.0000000 |
| O | -6.2659153 | -2.3689672 | 0.0000000 |
| N | -3.9670087 | -2.3608315 | 0.0000000 |
| N | 1.2157144  | 3.1720678  | 0.0000000 |
| H | 0.2127971  | 3.1601337  | 0.0000000 |
| H | 1.7064668  | 4.0486327  | 0.0000000 |
| O | 1.0778862  | -1.4210543 | 0.0000000 |
| H | -4.2071662 | 1.4839032  | 0.0000000 |
| N | -1.6750020 | -2.2685701 | 0.0000000 |
| H | -0.7760150 | -1.7934764 | 0.0000000 |
| H | -1.6976259 | -3.2766234 | 0.0000000 |
| H | 0.2535320  | 0.8658477  | 0.0000000 |
| F | -1.7583066 | 0.5100104  | 0.0000000 |
| H | 6.3116740  | -1.1891812 | 0.0000000 |

### 81 (CIC...G)

|   |           |            |           |
|---|-----------|------------|-----------|
| C | 3.2794024 | -0.3341800 | 0.0000000 |
| C | 4.0364275 | 0.8351302  | 0.0000000 |
| C | 2.3241819 | 2.2266853  | 0.0000000 |
| C | 1.8541506 | -0.2164162 | 0.0000000 |

|    |            |            |           |
|----|------------|------------|-----------|
| C  | 5.3032627  | -0.9635848 | 0.0000000 |
| N  | 4.0787725  | -1.4507589 | 0.0000000 |
| N  | 5.3327913  | 0.4087118  | 0.0000000 |
| H  | 6.1464302  | 1.0063051  | 0.0000000 |
| N  | 1.4822536  | 1.1475957  | 0.0000000 |
| N  | 3.6277298  | 2.1273650  | 0.0000000 |
| C  | -5.2870452 | -2.1834429 | 0.0000000 |
| C  | -4.6482665 | 0.1661356  | 0.0000000 |
| C  | -3.3385701 | -0.1814317 | 0.0000000 |
| C  | -3.0166383 | -1.5868076 | 0.0000000 |
| H  | -6.5735805 | -0.5697967 | 0.0000000 |
| N  | -5.5894046 | -0.8006743 | 0.0000000 |
| O  | -6.2099209 | -2.9797809 | 0.0000000 |
| N  | -3.9596019 | -2.5096095 | 0.0000000 |
| N  | 1.7442855  | 3.4541140  | 0.0000000 |
| H  | 0.7498104  | 3.5831981  | 0.0000000 |
| H  | 2.3515019  | 4.2545470  | 0.0000000 |
| O  | 0.9873376  | -1.0808701 | 0.0000000 |
| H  | -4.9782285 | 1.1974524  | 0.0000000 |
| N  | -1.7404863 | -1.9853331 | 0.0000000 |
| H  | -0.9350535 | -1.3701888 | 0.0000000 |
| H  | -1.5821859 | -2.9813527 | 0.0000000 |
| H  | 0.4784587  | 1.2892982  | 0.0000000 |
| Cl | -2.1255978 | 1.0503590  | 0.0000000 |
| H  | 6.2077836  | -1.5526692 | 0.0000000 |

## 82 (BrC...G)

|    |            |            |           |
|----|------------|------------|-----------|
| C  | 3.2785078  | -0.3284448 | 0.0000000 |
| C  | 4.0775326  | 0.8125323  | 0.0000000 |
| C  | 2.4169388  | 2.2654723  | 0.0000000 |
| C  | 1.8584327  | -0.1588482 | 0.0000000 |
| C  | 5.2781739  | -1.0309986 | 0.0000000 |
| N  | 4.0367696  | -1.4733413 | 0.0000000 |
| N  | 5.3575495  | 0.3393015  | 0.0000000 |
| H  | 6.1923645  | 0.9069402  | 0.0000000 |
| N  | 1.5362406  | 1.2178821  | 0.0000000 |
| N  | 3.7160085  | 2.1187727  | 0.0000000 |
| C  | -5.2852842 | -2.2858025 | 0.0000000 |
| C  | -4.7836597 | 0.0960595  | 0.0000000 |
| C  | -3.4544150 | -0.1735085 | 0.0000000 |
| C  | -3.0514629 | -1.5584212 | 0.0000000 |
| H  | -6.6633971 | -0.7484193 | 0.0000000 |
| N  | -5.6674023 | -0.9225327 | 0.0000000 |
| O  | -6.1604643 | -3.1341255 | 0.0000000 |
| N  | -3.9416679 | -2.5333689 | 0.0000000 |
| N  | 1.8828210  | 3.5136314  | 0.0000000 |
| H  | 0.8939604  | 3.6796784  | 0.0000000 |
| H  | 2.5192967  | 4.2910208  | 0.0000000 |
| O  | 0.9604393  | -0.9906975 | 0.0000000 |
| H  | -5.1777192 | 1.1047329  | 0.0000000 |
| N  | -1.7570626 | -1.8918999 | 0.0000000 |
| H  | -0.9810032 | -1.2411547 | 0.0000000 |
| H  | -1.5483754 | -2.8787692 | 0.0000000 |
| H  | 0.5374827  | 1.3945296  | 0.0000000 |
| Br | -2.2313152 | 1.2623203  | 0.0000000 |
| H  | 6.1607104  | -1.6525412 | 0.0000000 |

## 83 (IC...G)

|   |            |            |           |
|---|------------|------------|-----------|
| C | 3.2711186  | -0.3209769 | 0.0000000 |
| C | 4.1131545  | 0.7884451  | 0.0000000 |
| C | 2.5083013  | 2.3034871  | 0.0000000 |
| C | 1.8584022  | -0.0969999 | 0.0000000 |
| C | 5.2422873  | -1.0998273 | 0.0000000 |
| N | 3.9847575  | -1.4941648 | 0.0000000 |
| N | 5.3743928  | 0.2665137  | 0.0000000 |
| H | 6.2310698  | 0.8006935  | 0.0000000 |
| N | 1.5883294  | 1.2906329  | 0.0000000 |
| N | 3.8009001  | 2.1073429  | 0.0000000 |
| C | -5.2719625 | -2.3884188 | 0.0000000 |

|   |            |            |           |
|---|------------|------------|-----------|
| C | -4.9102188 | 0.0177931  | 0.0000000 |
| C | -3.5643286 | -0.1676161 | 0.0000000 |
| C | -3.0848638 | -1.5293799 | 0.0000000 |
| H | -6.7375567 | -0.9336308 | 0.0000000 |
| N | -5.7329331 | -1.0496409 | 0.0000000 |
| O | -6.0962438 | -3.2863285 | 0.0000000 |
| N | -3.9169358 | -2.5554413 | 0.0000000 |
| I | -2.3444649 | 1.5010988  | 0.0000000 |
| N | 2.0225513  | 3.5715584  | 0.0000000 |
| H | 1.0409800  | 3.7759355  | 0.0000000 |
| H | 2.6885700  | 4.3236863  | 0.0000000 |
| O | 0.9294093  | -0.8938701 | 0.0000000 |
| H | -5.3702799 | 0.9984220  | 0.0000000 |
| N | -1.7749783 | -1.7964082 | 0.0000000 |
| H | -1.0305378 | -1.1108788 | 0.0000000 |
| H | -1.5150852 | -2.7712209 | 0.0000000 |
| H | 0.5961801  | 1.5042772  | 0.0000000 |
| H | 6.0999852  | -1.7550837 | 0.0000000 |

#### 84 (C...FG)

|   |            |            |           |
|---|------------|------------|-----------|
| C | 2.1157392  | 0.2994080  | 0.0000000 |
| C | 3.4510668  | 0.6807849  | 0.0000000 |
| C | 3.0728913  | 2.8535807  | 0.0000000 |
| C | 1.1168941  | 1.3173903  | 0.0000000 |
| C | 3.2067451  | -1.4846714 | 0.0000000 |
| N | 1.9754785  | -1.0778541 | 0.0000000 |
| N | 4.1518167  | -0.5012221 | 0.0000000 |
| H | 5.1549441  | -0.6173719 | 0.0000000 |
| N | 1.7296367  | 2.5920667  | 0.0000000 |
| N | 3.9902899  | 1.9193106  | 0.0000000 |
| C | -4.3970383 | -3.1126729 | 0.0000000 |
| C | -4.6756422 | -0.6907382 | 0.0000000 |
| C | -3.3336662 | -0.5141991 | 0.0000000 |
| C | -2.5370493 | -1.7111413 | 0.0000000 |
| H | -6.1870124 | -2.1030296 | 0.0000000 |
| N | -5.1900247 | -1.9430036 | 0.0000000 |
| O | -4.9633759 | -4.1959041 | 0.0000000 |
| N | -3.0422206 | -2.9314840 | 0.0000000 |
| N | 3.4473273  | 4.1565962  | 0.0000000 |
| H | 2.7868508  | 4.9111869  | 0.0000000 |
| H | 4.4321130  | 4.3567386  | 0.0000000 |
| O | -0.1052049 | 1.2283284  | 0.0000000 |
| H | -5.3839400 | 0.1289611  | 0.0000000 |
| N | -1.2014606 | -1.5767122 | 0.0000000 |
| H | -0.7635612 | -0.6654761 | 0.0000000 |
| H | -0.6289723 | -2.4048322 | 0.0000000 |
| H | 1.0650137  | 3.3576472  | 0.0000000 |
| F | 3.5961580  | -2.7398178 | 0.0000000 |
| H | -2.8837966 | 0.4681312  | 0.0000000 |

#### 85 (C...CIG)

|   |            |            |           |
|---|------------|------------|-----------|
| C | 2.0971487  | 0.3275054  | 0.0000000 |
| C | 3.4418956  | 0.6816946  | 0.0000000 |
| C | 3.1058384  | 2.8622649  | 0.0000000 |
| C | 1.1177070  | 1.3680888  | 0.0000000 |
| C | 3.1605577  | -1.4936304 | 0.0000000 |
| N | 1.9297862  | -1.0391059 | 0.0000000 |
| N | 4.1144260  | -0.5100861 | 0.0000000 |
| H | 5.1164649  | -0.6401797 | 0.0000000 |
| N | 1.7562808  | 2.6291086  | 0.0000000 |
| N | 4.0048085  | 1.9108270  | 0.0000000 |
| C | -4.3644940 | -3.1268778 | 0.0000000 |
| C | -4.7126840 | -0.7139694 | 0.0000000 |
| C | -3.3763197 | -0.4991863 | 0.0000000 |
| C | -2.5452876 | -1.6725730 | 0.0000000 |
| H | -6.1829020 | -2.1689398 | 0.0000000 |
| N | -5.1908954 | -1.9804344 | 0.0000000 |
| O | -4.8996587 | -4.2259056 | 0.0000000 |
| N | -3.0155478 | -2.9069793 | 0.0000000 |

|    |            |            |           |
|----|------------|------------|-----------|
| N  | 3.5053281  | 4.1575327  | 0.0000000 |
| H  | 2.8598908  | 4.9250400  | 0.0000000 |
| H  | 4.4939381  | 4.3381095  | 0.0000000 |
| O  | -0.1052685 | 1.3036147  | 0.0000000 |
| H  | -5.4441214 | 0.0851817  | 0.0000000 |
| N  | -1.2144771 | -1.4999801 | 0.0000000 |
| H  | -0.8003580 | -0.5776444 | 0.0000000 |
| H  | -0.6163331 | -2.3098498 | 0.0000000 |
| H  | 1.1084699  | 3.4089615  | 0.0000000 |
| Cl | 3.6114040  | -3.1286041 | 0.0000000 |
| H  | -2.9555971 | 0.4960166  | 0.0000000 |

## 86 (C...BrG)

|    |            |            |           |
|----|------------|------------|-----------|
| C  | 2.0916098  | 0.3393047  | 0.0000000 |
| C  | 3.4387732  | 0.6856301  | 0.0000000 |
| C  | 3.1149282  | 2.8682120  | 0.0000000 |
| C  | 1.1178368  | 1.3859774  | 0.0000000 |
| C  | 3.1456104  | -1.4894470 | 0.0000000 |
| N  | 1.9164727  | -1.0258568 | 0.0000000 |
| N  | 4.1041324  | -0.5099252 | 0.0000000 |
| H  | 5.1057714  | -0.6441800 | 0.0000000 |
| N  | 1.7637850  | 2.6430860  | 0.0000000 |
| N  | 4.0085226  | 1.9118074  | 0.0000000 |
| C  | -4.3524967 | -3.1328056 | 0.0000000 |
| C  | -4.7249632 | -0.7235317 | 0.0000000 |
| C  | -3.3908075 | -0.4954027 | 0.0000000 |
| C  | -2.5479275 | -1.6603141 | 0.0000000 |
| H  | -6.1804776 | -2.1931681 | 0.0000000 |
| N  | -5.1904165 | -1.9947086 | 0.0000000 |
| O  | -4.8766666 | -4.2371363 | 0.0000000 |
| N  | -3.0058438 | -2.8994016 | 0.0000000 |
| N  | 3.5216601  | 4.1611555  | 0.0000000 |
| H  | 2.8806070  | 4.9323268  | 0.0000000 |
| H  | 4.5113103  | 4.3360731  | 0.0000000 |
| O  | -0.1053540 | 1.3285083  | 0.0000000 |
| H  | -5.4643309 | 0.0682475  | 0.0000000 |
| N  | -1.2189691 | -1.4745273 | 0.0000000 |
| H  | -0.8130753 | -0.5485609 | 0.0000000 |
| H  | -0.6123759 | -2.2781365 | 0.0000000 |
| H  | 1.1207202  | 3.4268550  | 0.0000000 |
| Br | 3.6223089  | -3.2841648 | 0.0000000 |
| H  | -2.9803445 | 0.5040834  | 0.0000000 |

## 87 (C...IG)

|   |            |            |           |
|---|------------|------------|-----------|
| C | 2.0761815  | 0.3658267  | 0.0000000 |
| C | 3.4312565  | 0.6821844  | 0.0000000 |
| C | 3.1558236  | 2.8717632  | 0.0000000 |
| C | 1.1258407  | 1.4348322  | 0.0000000 |
| C | 3.0922292  | -1.4907991 | 0.0000000 |
| N | 1.8718030  | -0.9938146 | 0.0000000 |
| N | 4.0694198  | -0.5269116 | 0.0000000 |
| H | 5.0686659  | -0.6787652 | 0.0000000 |
| N | 1.7998166  | 2.6770054  | 0.0000000 |
| N | 4.0278824  | 1.8959526  | 0.0000000 |
| C | -4.3037396 | -3.1631784 | 0.0000000 |
| C | -4.7696860 | -0.7702865 | 0.0000000 |
| C | -3.4453566 | -0.4907233 | 0.0000000 |
| C | -2.5574262 | -1.6217246 | 0.0000000 |
| H | -6.1670282 | -2.2952853 | 0.0000000 |
| N | -5.1854339 | -2.0585020 | 0.0000000 |
| O | -4.7848145 | -4.2870160 | 0.0000000 |
| N | -2.9673320 | -2.8777642 | 0.0000000 |
| I | 3.5558808  | -3.4803166 | 0.0000000 |
| N | 3.5909354  | 4.1555733  | 0.0000000 |
| H | 2.9670147  | 4.9406490  | 0.0000000 |
| H | 4.5841976  | 4.3085708  | 0.0000000 |
| O | -0.0983338 | 1.4060450  | 0.0000000 |
| H | -5.5391095 | -0.0076832 | 0.0000000 |
| N | -1.2369527 | -1.3852794 | 0.0000000 |



|   |            |            |           |
|---|------------|------------|-----------|
| H | -0.8628580 | -0.4457539 | 0.0000000 |
| H | -0.5983837 | -2.1638949 | 0.0000000 |
| H | 1.1744891  | 3.4749878  | 0.0000000 |
| H | -3.0749818 | 0.5243083  | 0.0000000 |

### 88 (FC...FG)

|   |            |            |           |
|---|------------|------------|-----------|
| C | 3.2391919  | -0.3678931 | 0.0000000 |
| C | 3.8303254  | 0.8909055  | 0.0000000 |
| C | 1.9487729  | 2.0372323  | 0.0000000 |
| C | 1.8148296  | -0.4440158 | 0.0000000 |
| C | 5.2999056  | -0.7166409 | 0.0000000 |
| N | 4.1861558  | -1.3776265 | 0.0000000 |
| N | 5.1816415  | 0.6427265  | 0.0000000 |
| H | 5.9272620  | 1.3232366  | 0.0000000 |
| N | 1.2617801  | 0.8563588  | 0.0000000 |
| N | 3.2561226  | 2.1139146  | 0.0000000 |
| C | -5.2122854 | -1.7656537 | 0.0000000 |
| C | -4.1119049 | 0.4101569  | 0.0000000 |
| C | -2.9161864 | -0.2103248 | 0.0000000 |
| C | -2.8676144 | -1.6436580 | 0.0000000 |
| H | -6.1502798 | 0.0692174  | 0.0000000 |
| N | -5.2325403 | -0.3531572 | 0.0000000 |
| O | -6.2735064 | -2.3653745 | 0.0000000 |
| N | -3.9747114 | -2.3572347 | 0.0000000 |
| N | 1.2098779  | 3.1748525  | 0.0000000 |
| H | 0.2068632  | 3.1638729  | 0.0000000 |
| H | 1.7015691  | 4.0509550  | 0.0000000 |
| O | 1.0746824  | -1.4210963 | 0.0000000 |
| H | -4.2146395 | 1.4874234  | 0.0000000 |
| N | -1.6829021 | -2.2657301 | 0.0000000 |
| H | -0.7842278 | -1.7910397 | 0.0000000 |
| H | -1.7055009 | -3.2737651 | 0.0000000 |
| H | 0.2476087  | 0.8652414  | 0.0000000 |
| F | 6.5049853  | -1.2462382 | 0.0000000 |
| F | -1.7652748 | 0.5133550  | 0.0000000 |

### 89 (CIC...CIG)

|    |            |            |           |
|----|------------|------------|-----------|
| C  | 3.2614200  | -0.3214341 | 0.0000000 |
| C  | 4.0168716  | 0.8480759  | 0.0000000 |
| C  | 2.3045201  | 2.2373080  | 0.0000000 |
| C  | 1.8365946  | -0.2064990 | 0.0000000 |
| C  | 5.2729984  | -0.9480457 | 0.0000000 |
| N  | 4.0597111  | -1.4430895 | 0.0000000 |
| N  | 5.3170331  | 0.4217695  | 0.0000000 |
| H  | 6.1440650  | 1.0018288  | 0.0000000 |
| N  | 1.4643849  | 1.1580170  | 0.0000000 |
| N  | 3.6095756  | 2.1377108  | 0.0000000 |
| C  | -5.3058808 | -2.1718729 | 0.0000000 |
| C  | -4.6665552 | 0.1777193  | 0.0000000 |
| C  | -3.3569353 | -0.1702818 | 0.0000000 |
| C  | -3.0354772 | -1.5756781 | 0.0000000 |
| H  | -6.5919479 | -0.5576563 | 0.0000000 |
| N  | -5.6078057 | -0.7888412 | 0.0000000 |
| O  | -6.2286446 | -2.9679981 | 0.0000000 |
| N  | -3.9783204 | -2.4982034 | 0.0000000 |
| N  | 1.7268993  | 3.4643986  | 0.0000000 |
| H  | 0.7324486  | 3.5947742  | 0.0000000 |
| H  | 2.3349355  | 4.2643893  | 0.0000000 |
| O  | 0.9720612  | -1.0724665 | 0.0000000 |
| H  | -4.9964927 | 1.2090577  | 0.0000000 |
| N  | -1.7592713 | -1.9745959 | 0.0000000 |
| H  | -0.9548167 | -1.3589889 | 0.0000000 |
| H  | -1.6006587 | -2.9705262 | 0.0000000 |
| H  | 0.4601678  | 1.2987808  | 0.0000000 |
| Cl | -2.1434144 | 1.0615061  | 0.0000000 |
| Cl | 6.7125342  | -1.8491584 | 0.0000000 |

### 90 (BrC...BrG)

|    |            |            |           |
|----|------------|------------|-----------|
| C  | 3.2566336  | -0.3118200 | 0.0000000 |
| C  | 4.0543241  | 0.8296216  | 0.0000000 |
| C  | 2.3931299  | 2.2800681  | 0.0000000 |
| C  | 1.8363521  | -0.1449230 | 0.0000000 |
| C  | 5.2457517  | -1.0114650 | 0.0000000 |
| N  | 4.0133443  | -1.4614773 | 0.0000000 |
| N  | 5.3379198  | 0.3563062  | 0.0000000 |
| H  | 6.1847380  | 0.9073710  | 0.0000000 |
| N  | 1.5139223  | 1.2321499  | 0.0000000 |
| N  | 3.6936679  | 2.1332409  | 0.0000000 |
| C  | -5.3082978 | -2.2704359 | 0.0000000 |
| C  | -4.8061200 | 0.1114702  | 0.0000000 |
| C  | -3.4769231 | -0.1585207 | 0.0000000 |
| C  | -3.0745089 | -1.5434875 | 0.0000000 |
| H  | -6.6858935 | -0.7324253 | 0.0000000 |
| N  | -5.6899377 | -0.9068956 | 0.0000000 |
| O  | -6.1833822 | -3.1185340 | 0.0000000 |
| N  | -3.9645533 | -2.5181560 | 0.0000000 |
| N  | 1.8611789  | 3.5276546  | 0.0000000 |
| H  | 0.8724037  | 3.6951251  | 0.0000000 |
| H  | 2.4984531  | 4.3045783  | 0.0000000 |
| O  | 0.9410123  | -0.9785917 | 0.0000000 |
| H  | -5.2002237 | 1.1201247  | 0.0000000 |
| N  | -1.7799994 | -1.8773219 | 0.0000000 |
| H  | -1.0051388 | -1.2259075 | 0.0000000 |
| H  | -1.5709982 | -2.8641134 | 0.0000000 |
| H  | 0.5147005  | 1.4080139  | 0.0000000 |
| Br | 6.7817772  | -2.0589401 | 0.0000000 |
| Br | -2.2533328 | 1.2772902  | 0.0000000 |

## 91 (IC...IG)

|   |            |            |           |
|---|------------|------------|-----------|
| C | 3.2446531  | -0.2997347 | 0.0000000 |
| C | 4.0857426  | 0.8106369  | 0.0000000 |
| C | 2.4804605  | 2.3232128  | 0.0000000 |
| C | 1.8312526  | -0.0780733 | 0.0000000 |
| C | 5.2101564  | -1.0771469 | 0.0000000 |
| N | 3.9560415  | -1.4762960 | 0.0000000 |
| N | 5.3492851  | 0.2887989  | 0.0000000 |
| H | 6.2145256  | 0.8107616  | 0.0000000 |
| N | 1.5614735  | 1.3099802  | 0.0000000 |
| N | 3.7743716  | 2.1273137  | 0.0000000 |
| C | -5.2990935 | -2.3683333 | 0.0000000 |
| C | -4.9370365 | 0.0380139  | 0.0000000 |
| C | -3.5911221 | -0.1475908 | 0.0000000 |
| C | -3.1121309 | -1.5094202 | 0.0000000 |
| H | -6.7643603 | -0.9130431 | 0.0000000 |
| N | -5.7597274 | -1.0292969 | 0.0000000 |
| O | -6.1231340 | -3.2661226 | 0.0000000 |
| N | -3.9439222 | -2.5353131 | 0.0000000 |
| I | -2.3709352 | 1.5211904  | 0.0000000 |
| I | 6.8457313  | -2.3044103 | 0.0000000 |
| N | 1.9965461  | 3.5904768  | 0.0000000 |
| H | 1.0149864  | 3.7953791  | 0.0000000 |
| H | 2.6630565  | 4.3424744  | 0.0000000 |
| O | 0.9046629  | -0.8767678 | 0.0000000 |
| H | -5.3972071 | 1.0185802  | 0.0000000 |
| N | -1.8021469 | -1.7766798 | 0.0000000 |
| H | -1.0589985 | -1.0903827 | 0.0000000 |
| H | -1.5420623 | -2.7514359 | 0.0000000 |
| H | 0.5689315  | 1.5232286  | 0.0000000 |

## Binding mode d

### 92 (C...G)

|   |            |            |           |
|---|------------|------------|-----------|
| C | 0.0233420  | -1.8063236 | 0.0000000 |
| C | -0.2538011 | -3.1701993 | 0.0000000 |
| C | 1.8500163  | -3.8370705 | 0.0000000 |
| C | 1.3920567  | -1.3911196 | 0.0000000 |
| C | -2.0926230 | -1.9614178 | 0.0000000 |

|   |            |            |           |
|---|------------|------------|-----------|
| N | -1.1294767 | -1.0599495 | 0.0000000 |
| N | -1.6167326 | -3.2471640 | 0.0000000 |
| H | -2.1560769 | -4.1007659 | 0.0000000 |
| N | 2.2388483  | -2.5237329 | 0.0000000 |
| N | 0.6001202  | -4.2214906 | 0.0000000 |
| C | -1.0408022 | 5.3059610  | 0.0000000 |
| C | -2.2436476 | 3.1867333  | 0.0000000 |
| C | -1.0803838 | 2.4936647  | 0.0000000 |
| C | 0.1174787  | 3.2853847  | 0.0000000 |
| H | -3.0813369 | 5.0792157  | 0.0000000 |
| N | -2.2267677 | 4.5413350  | 0.0000000 |
| O | -1.1341319 | 6.5251662  | 0.0000000 |
| N | 0.1338476  | 4.6059525  | 0.0000000 |
| N | 2.8363902  | -4.7680239 | 0.0000000 |
| H | 3.8098281  | -4.5274750 | 0.0000000 |
| H | 2.5619671  | -5.7346467 | 0.0000000 |
| O | 1.8852378  | -0.2715777 | 0.0000000 |
| H | -3.2172096 | 2.7112733  | 0.0000000 |
| N | 1.3031485  | 2.6484028  | 0.0000000 |
| H | 1.3746502  | 1.6396657  | 0.0000000 |
| H | 2.1327380  | 3.2186670  | 0.0000000 |
| H | 3.2247663  | -2.2880582 | 0.0000000 |
| H | -3.1498774 | -1.7442319 | 0.0000000 |
| H | -1.0615687 | 1.4118253  | 0.0000000 |

### 93 (FC...G)

|   |            |            |           |
|---|------------|------------|-----------|
| C | -0.0742271 | -2.1871827 | 0.0000000 |
| C | -0.1340883 | -3.5781846 | 0.0000000 |
| C | 2.0480715  | -3.9079292 | 0.0000000 |
| C | 1.2122989  | -1.5633027 | 0.0000000 |
| C | -2.1375740 | -2.6686590 | 0.0000000 |
| N | -1.3281675 | -1.6285428 | 0.0000000 |
| N | -1.4679519 | -3.8670403 | 0.0000000 |
| H | -1.8674435 | -4.7941541 | 0.0000000 |
| N | 2.2266400  | -2.5500455 | 0.0000000 |
| N | 0.8744975  | -4.4835524 | 0.0000000 |
| C | -0.6377923 | 5.6738717  | 0.0000000 |
| C | -2.3916510 | 3.9762265  | 0.0000000 |
| C | -1.4488246 | 3.0127204  | 0.0000000 |
| C | -0.0693621 | 3.4028308  | 0.0000000 |
| H | -2.6611112 | 6.0277972  | 0.0000000 |
| N | -1.9876077 | 5.2752742  | 0.0000000 |
| O | -0.3757784 | 6.8671928  | 0.0000000 |
| N | 0.2960561  | 4.6681787  | 0.0000000 |
| N | 3.1694398  | -4.6728567 | 0.0000000 |
| H | 4.0927950  | -4.2822183 | 0.0000000 |
| H | 3.0498665  | -5.6703904 | 0.0000000 |
| O | 1.5250707  | -0.3803119 | 0.0000000 |
| H | -3.4517767 | 3.7600131  | 0.0000000 |
| N | 0.8679088  | 2.4449638  | 0.0000000 |
| H | 0.6617795  | 1.4541495  | 0.0000000 |
| H | 1.8293941  | 2.7445232  | 0.0000000 |
| H | 3.1636985  | -2.1638255 | 0.0000000 |
| F | -1.7683473 | 1.7087537  | 0.0000000 |
| H | -3.2158133 | -2.6182995 | 0.0000000 |

### 94 (CIC...G)

|   |            |            |           |
|---|------------|------------|-----------|
| C | -0.1633228 | -2.2424061 | 0.0000000 |
| C | -0.1592948 | -3.6354714 | 0.0000000 |
| C | 2.0346520  | -3.8702304 | 0.0000000 |
| C | 1.0966129  | -1.5622534 | 0.0000000 |
| C | -2.2041099 | -2.8242993 | 0.0000000 |
| N | -1.4447571 | -1.7466743 | 0.0000000 |
| N | -1.4778502 | -3.9876602 | 0.0000000 |
| H | -1.8313052 | -4.9334071 | 0.0000000 |
| N | 2.1523114  | -2.5063826 | 0.0000000 |
| N | 0.8869940  | -4.4960522 | 0.0000000 |
| C | -0.5990368 | 5.7310580  | 0.0000000 |
| C | -2.3276352 | 4.0118468  | 0.0000000 |

|    |            |            |           |
|----|------------|------------|-----------|
| C  | -1.3832631 | 3.0406549  | 0.0000000 |
| C  | -0.0066515 | 3.4675468  | 0.0000000 |
| H  | -2.6300538 | 6.0541880  | 0.0000000 |
| N  | -1.9454176 | 5.3110988  | 0.0000000 |
| O  | -0.3591384 | 6.9287403  | 0.0000000 |
| N  | 0.3435118  | 4.7392452  | 0.0000000 |
| N  | 3.1872300  | -4.5865419 | 0.0000000 |
| H  | 4.0932884  | -4.1573205 | 0.0000000 |
| H  | 3.1098646  | -5.5883134 | 0.0000000 |
| O  | 1.3654791  | -0.3692495 | 0.0000000 |
| H  | -3.3885822 | 3.7954576  | 0.0000000 |
| N  | 0.9607890  | 2.5397539  | 0.0000000 |
| H  | 0.7782088  | 1.5441176  | 0.0000000 |
| H  | 1.9105103  | 2.8748571  | 0.0000000 |
| H  | 3.0708546  | -2.0777149 | 0.0000000 |
| Cl | -1.7863690 | 1.3702064  | 0.0000000 |
| H  | -3.2835191 | -2.8247942 | 0.0000000 |

### 95 (BrC...G)

|    |            |            |           |
|----|------------|------------|-----------|
| C  | -0.1798147 | -2.2905301 | 0.0000000 |
| C  | -0.1519378 | -3.6835852 | 0.0000000 |
| C  | 2.0451202  | -3.8829030 | 0.0000000 |
| C  | 1.0693231  | -1.5884279 | 0.0000000 |
| C  | -2.2114486 | -2.9098053 | 0.0000000 |
| N  | -1.4709158 | -1.8188519 | 0.0000000 |
| N  | -1.4643001 | -4.0588176 | 0.0000000 |
| H  | -1.8005702 | -5.0107794 | 0.0000000 |
| N  | 2.1397867  | -2.5173111 | 0.0000000 |
| N  | 0.9077360  | -4.5275215 | 0.0000000 |
| C  | -0.5692218 | 5.7813670  | 0.0000000 |
| C  | -2.3248161 | 4.0905626  | 0.0000000 |
| C  | -1.3971362 | 3.1021474  | 0.0000000 |
| C  | -0.0135675 | 3.5074654  | 0.0000000 |
| H  | -2.5953202 | 6.1373478  | 0.0000000 |
| N  | -1.9226038 | 5.3831416  | 0.0000000 |
| O  | -0.3101022 | 6.9749448  | 0.0000000 |
| N  | 0.3563425  | 4.7743452  | 0.0000000 |
| N  | 3.2094502  | -4.5798605 | 0.0000000 |
| H  | 4.1082216  | -4.1355550 | 0.0000000 |
| H  | 3.1496704  | -5.5828666 | 0.0000000 |
| O  | 1.3198045  | -0.3918635 | 0.0000000 |
| H  | -3.3902774 | 3.8966935  | 0.0000000 |
| N  | 0.9474917  | 2.5713325  | 0.0000000 |
| H  | 0.7586380  | 1.5772761  | 0.0000000 |
| H  | 1.8992565  | 2.9008779  | 0.0000000 |
| H  | 3.0516007  | -2.0745184 | 0.0000000 |
| Br | -1.8697609 | 1.2839198  | 0.0000000 |
| H  | -3.2906485 | -2.9282244 | 0.0000000 |

### 96 (IC...G)

|   |            |            |           |
|---|------------|------------|-----------|
| C | -0.1962330 | -2.3480290 | 0.0000000 |
| C | -0.1418494 | -3.7401155 | 0.0000000 |
| C | 2.0591375  | -3.8992918 | 0.0000000 |
| C | 1.0414480  | -1.6222266 | 0.0000000 |
| C | -2.2175242 | -3.0103968 | 0.0000000 |
| N | -1.4982230 | -1.9048334 | 0.0000000 |
| N | -1.4467173 | -4.1424592 | 0.0000000 |
| H | -1.7635900 | -5.1013317 | 0.0000000 |
| N | 2.1285273  | -2.5327375 | 0.0000000 |
| N | 0.9330412  | -4.5638403 | 0.0000000 |
| C | -0.5423411 | 5.8427991  | 0.0000000 |
| C | -2.3225196 | 4.1795258  | 0.0000000 |
| C | -1.4142268 | 3.1707337  | 0.0000000 |
| C | -0.0247332 | 3.5599404  | 0.0000000 |
| H | -2.5627451 | 6.2299976  | 0.0000000 |
| N | -1.9015007 | 5.4653977  | 0.0000000 |
| O | -0.2644128 | 7.0323420  | 0.0000000 |
| N | 0.3661346  | 4.8212965  | 0.0000000 |
| I | -1.9628179 | 1.1813292  | 0.0000000 |

|   |            |            |           |
|---|------------|------------|-----------|
| N | 3.2356241  | -4.5750702 | 0.0000000 |
| H | 4.1266228  | -4.1149084 | 0.0000000 |
| H | 3.1940717  | -5.5790060 | 0.0000000 |
| O | 1.2709689  | -0.4223184 | 0.0000000 |
| H | -3.3923867 | 4.0097334  | 0.0000000 |
| N | 0.9329883  | 2.6173798  | 0.0000000 |
| H | 0.7410122  | 1.6246348  | 0.0000000 |
| H | 1.8859944  | 2.9435947  | 0.0000000 |
| H | 3.0321841  | -2.0734270 | 0.0000000 |
| H | -3.2959341 | -3.0487128 | 0.0000000 |

### 97 (C...FG)

|   |            |            |           |
|---|------------|------------|-----------|
| C | -0.0045781 | -1.8152648 | 0.0000000 |
| C | -0.2649162 | -3.1800512 | 0.0000000 |
| C | 1.8435657  | -3.8239971 | 0.0000000 |
| C | 1.3552888  | -1.3826806 | 0.0000000 |
| C | -2.0895646 | -1.9898299 | 0.0000000 |
| N | -1.1730283 | -1.0728608 | 0.0000000 |
| N | -1.6361507 | -3.2753690 | 0.0000000 |
| H | -2.1894789 | -4.1201599 | 0.0000000 |
| N | 2.2150478  | -2.5077888 | 0.0000000 |
| N | 0.5955824  | -4.2209364 | 0.0000000 |
| C | -1.0444053 | 5.2976287  | 0.0000000 |
| C | -2.1936866 | 3.1489140  | 0.0000000 |
| C | -1.0127025 | 2.4866563  | 0.0000000 |
| C | 0.1645272  | 3.3075023  | 0.0000000 |
| H | -3.0786211 | 5.0192212  | 0.0000000 |
| N | -2.2105858 | 4.5032102  | 0.0000000 |
| O | -1.1678612 | 6.5139493  | 0.0000000 |
| N | 0.1481200  | 4.6275012  | 0.0000000 |
| N | 2.8371688  | -4.7459493 | 0.0000000 |
| H | 3.8085517  | -4.4965603 | 0.0000000 |
| H | 2.5716361  | -5.7151506 | 0.0000000 |
| O | 1.8356747  | -0.2574879 | 0.0000000 |
| H | -3.1537648 | 2.6469449  | 0.0000000 |
| N | 1.3658135  | 2.6987517  | 0.0000000 |
| H | 1.4543312  | 1.6921011  | 0.0000000 |
| H | 2.1825329  | 3.2870468  | 0.0000000 |
| H | 3.1980383  | -2.2594639 | 0.0000000 |
| F | -3.3868872 | -1.7722467 | 0.0000000 |
| H | -0.9696479 | 1.4063694  | 0.0000000 |

### 98 (C...CIG)

|   |            |            |           |
|---|------------|------------|-----------|
| C | 0.0753227  | -1.8012556 | 0.0000000 |
| C | -0.2161421 | -3.1612688 | 0.0000000 |
| C | 1.8796748  | -3.8485958 | 0.0000000 |
| C | 1.4466908  | -1.3974281 | 0.0000000 |
| C | -2.0301453 | -1.9293621 | 0.0000000 |
| N | -1.0690851 | -1.0366588 | 0.0000000 |
| N | -1.5837702 | -3.2239086 | 0.0000000 |
| H | -2.1510727 | -4.0601054 | 0.0000000 |
| N | 2.2815531  | -2.5399687 | 0.0000000 |
| N | 0.6241136  | -4.2199225 | 0.0000000 |
| C | -1.0514076 | 5.2934441  | 0.0000000 |
| C | -2.2427050 | 3.1678231  | 0.0000000 |
| C | -1.0750861 | 2.4821181  | 0.0000000 |
| C | 0.1182181  | 3.2796228  | 0.0000000 |
| H | -3.0908662 | 5.0552364  | 0.0000000 |
| N | -2.2331690 | 4.5222431  | 0.0000000 |
| O | -1.1508127 | 6.5120318  | 0.0000000 |
| N | 0.1274441  | 4.5998909  | 0.0000000 |
| N | 2.8535070  | -4.7909293 | 0.0000000 |
| H | 3.8300362  | -4.5625710 | 0.0000000 |
| H | 2.5673099  | -5.7543078 | 0.0000000 |
| O | 1.9474538  | -0.2819047 | 0.0000000 |
| H | -3.2127328 | 2.6851324  | 0.0000000 |
| N | 1.3083444  | 2.6494438  | 0.0000000 |
| H | 1.3873876  | 1.6417832  | 0.0000000 |
| H | 2.1345588  | 3.2245462  | 0.0000000 |
| H | 3.2701137  | -2.3147091 | 0.0000000 |

|    |            |            |           |
|----|------------|------------|-----------|
| Cl | -3.6935779 | -1.5914064 | 0.0000000 |
| H  | -1.0511558 | 1.4009866  | 0.0000000 |

### 99 (C...BrG)

|    |            |            |           |
|----|------------|------------|-----------|
| C  | 0.0955424  | -1.7965344 | 0.0000000 |
| C  | -0.2034874 | -3.1551675 | 0.0000000 |
| C  | 1.8891244  | -3.8528377 | 0.0000000 |
| C  | 1.4694438  | -1.3994433 | 0.0000000 |
| C  | -2.0122789 | -1.9133013 | 0.0000000 |
| N  | -1.0441241 | -1.0260184 | 0.0000000 |
| N  | -1.5713397 | -3.2101639 | 0.0000000 |
| H  | -2.1418580 | -4.0443670 | 0.0000000 |
| N  | 2.2982507  | -2.5461619 | 0.0000000 |
| N  | 0.6317649  | -4.2179875 | 0.0000000 |
| C  | -1.0561499 | 5.2877334  | 0.0000000 |
| C  | -2.2487987 | 3.1628786  | 0.0000000 |
| C  | -1.0815975 | 2.4764510  | 0.0000000 |
| C  | 0.1122363  | 3.2731655  | 0.0000000 |
| H  | -3.0957307 | 5.0508984  | 0.0000000 |
| N  | -2.2384180 | 4.5172977  | 0.0000000 |
| O  | -1.1548749 | 6.5063787  | 0.0000000 |
| N  | 0.1222846  | 4.5934473  | 0.0000000 |
| N  | 2.8581208  | -4.7999999 | 0.0000000 |
| H  | 3.8358587  | -4.5767709 | 0.0000000 |
| H  | 2.5668603  | -5.7618682 | 0.0000000 |
| O  | 1.9749507  | -0.2862334 | 0.0000000 |
| H  | -3.2191509 | 2.6807446  | 0.0000000 |
| N  | 1.3021810  | 2.6425036  | 0.0000000 |
| H  | 1.3821265  | 1.6349257  | 0.0000000 |
| H  | 2.1285476  | 3.2174358  | 0.0000000 |
| H  | 3.2880590  | -2.3263730 | 0.0000000 |
| Br | -3.8297238 | -1.5259326 | 0.0000000 |
| H  | -1.0578193 | 1.3953010  | 0.0000000 |

### 100 (C...IG)

|   |            |            |           |
|---|------------|------------|-----------|
| C | 0.1354107  | -1.7851446 | 0.0000000 |
| C | -0.1797054 | -3.1403098 | 0.0000000 |
| C | 1.9058155  | -3.8604616 | 0.0000000 |
| C | 1.5139716  | -1.4028583 | 0.0000000 |
| C | -1.9787883 | -1.8764651 | 0.0000000 |
| N | -0.9935078 | -1.0022907 | 0.0000000 |
| N | -1.5473059 | -3.1788789 | 0.0000000 |
| H | -2.1241014 | -4.0089668 | 0.0000000 |
| N | 2.3302038  | -2.5582327 | 0.0000000 |
| N | 0.6446993  | -4.2120731 | 0.0000000 |
| C | -1.0709206 | 5.2760080  | 0.0000000 |
| C | -2.2703585 | 3.1549826  | 0.0000000 |
| C | -1.1053741 | 2.4648350  | 0.0000000 |
| C | 0.0911185  | 3.2576296  | 0.0000000 |
| H | -3.1113187 | 5.0457198  | 0.0000000 |
| N | -2.2557429 | 4.5093913  | 0.0000000 |
| O | -1.1658657 | 6.4949822  | 0.0000000 |
| N | 0.1052638  | 4.5779760  | 0.0000000 |
| I | -3.9681573 | -1.4070333 | 0.0000000 |
| N | 2.8645260  | -4.8181387 | 0.0000000 |
| H | 3.8446185  | -4.6055267 | 0.0000000 |
| H | 2.5626786  | -5.7767386 | 0.0000000 |
| O | 2.0295734  | -0.2943464 | 0.0000000 |
| H | -3.2422611 | 2.6757917  | 0.0000000 |
| N | 1.2793707  | 2.6237226  | 0.0000000 |
| H | 1.3599365  | 1.6161084  | 0.0000000 |
| H | 2.1070899  | 3.1968144  | 0.0000000 |
| H | 3.3225173  | -2.3501184 | 0.0000000 |
| H | -1.0833862 | 1.3836222  | 0.0000000 |

### 101 (FC...FG)

|   |            |            |           |
|---|------------|------------|-----------|
| C | -0.0765051 | -2.1234752 | 0.0000000 |
| C | -0.1639424 | -3.5112792 | 0.0000000 |

|   |            |            |           |
|---|------------|------------|-----------|
| C | 2.0077979  | -3.8896077 | 0.0000000 |
| C | 1.2197721  | -1.5269325 | 0.0000000 |
| C | -2.1208264 | -2.5556777 | 0.0000000 |
| N | -1.3274486 | -1.5321787 | 0.0000000 |
| N | -1.5118134 | -3.7768457 | 0.0000000 |
| H | -1.9557127 | -4.6836058 | 0.0000000 |
| N | 2.2126239  | -2.5377873 | 0.0000000 |
| N | 0.8193080  | -4.4381508 | 0.0000000 |
| C | -0.7239794 | 5.6288198  | 0.0000000 |
| C | -2.3413120 | 3.8003461  | 0.0000000 |
| C | -1.3264818 | 2.9132951  | 0.0000000 |
| C | 0.0180324  | 3.4093516  | 0.0000000 |
| H | -2.7680684 | 5.8246024  | 0.0000000 |
| N | -2.0384186 | 5.1265216  | 0.0000000 |
| O | -0.5555261 | 6.8388842  | 0.0000000 |
| N | 0.2857206  | 4.6985313  | 0.0000000 |
| N | 3.1092150  | -4.6815219 | 0.0000000 |
| H | 4.0419101  | -4.3134003 | 0.0000000 |
| H | 2.9657283  | -5.6760189 | 0.0000000 |
| O | 1.5620247  | -0.3518071 | 0.0000000 |
| H | -3.3813459 | 3.5017806  | 0.0000000 |
| N | 1.0253013  | 2.5239909  | 0.0000000 |
| H | 0.8845988  | 1.5211577  | 0.0000000 |
| H | 1.9608416  | 2.8966882  | 0.0000000 |
| H | 3.1571510  | -2.1695834 | 0.0000000 |
| F | -1.5426371 | 1.5890243  | 0.0000000 |
| F | -3.4360077 | -2.5051218 | 0.0000000 |

## 102 (ClC...ClG)

|    |            |            |           |
|----|------------|------------|-----------|
| C  | -0.1281711 | -2.2474504 | 0.0000000 |
| C  | -0.1298100 | -3.6398194 | 0.0000000 |
| C  | 2.0617928  | -3.8834405 | 0.0000000 |
| C  | 1.1328133  | -1.5709001 | 0.0000000 |
| C  | -2.1601490 | -2.8140164 | 0.0000000 |
| N  | -1.4085234 | -1.7400227 | 0.0000000 |
| N  | -1.4534541 | -3.9871632 | 0.0000000 |
| H  | -1.8324674 | -4.9236621 | 0.0000000 |
| N  | 2.1844227  | -2.5208930 | 0.0000000 |
| N  | 0.9097341  | -4.5043362 | 0.0000000 |
| C  | -0.5810075 | 5.7399588  | 0.0000000 |
| C  | -2.3159170 | 4.0271928  | 0.0000000 |
| C  | -1.3749244 | 3.0525550  | 0.0000000 |
| C  | 0.0030896  | 3.4741611  | 0.0000000 |
| H  | -2.6110180 | 6.0704214  | 0.0000000 |
| N  | -1.9289684 | 5.3248494  | 0.0000000 |
| O  | -0.3363443 | 6.9364982  | 0.0000000 |
| N  | 0.3578147  | 4.7443209  | 0.0000000 |
| N  | 3.2093069  | -4.6057389 | 0.0000000 |
| H  | 4.1178074  | -4.1812863 | 0.0000000 |
| H  | 3.1272259  | -5.6072853 | 0.0000000 |
| O  | 1.4035248  | -0.3788660 | 0.0000000 |
| H  | -3.3776325 | 3.8144635  | 0.0000000 |
| N  | 0.9681491  | 2.5432128  | 0.0000000 |
| H  | 0.7826070  | 1.5486976  | 0.0000000 |
| H  | 1.9189637  | 2.8752478  | 0.0000000 |
| H  | 3.1051029  | -2.0964683 | 0.0000000 |
| Cl | -3.8576511 | -2.8340923 | 0.0000000 |
| Cl | -1.7863168 | 1.3838620  | 0.0000000 |

## 103 (BrC...BrG)

|   |            |            |           |
|---|------------|------------|-----------|
| C | -0.1511499 | -2.2913502 | 0.0000000 |
| C | -0.1229155 | -3.6839954 | 0.0000000 |
| C | 2.0732754  | -3.8815932 | 0.0000000 |
| C | 1.0967721  | -1.5876140 | 0.0000000 |
| C | -2.1733242 | -2.9053043 | 0.0000000 |
| N | -1.4431873 | -1.8143036 | 0.0000000 |
| N | -1.4385176 | -4.0606744 | 0.0000000 |
| H | -1.7943622 | -5.0064410 | 0.0000000 |
| N | 2.1671548  | -2.5168864 | 0.0000000 |

|    |            |            |           |
|----|------------|------------|-----------|
| N  | 0.9344513  | -4.5265728 | 0.0000000 |
| C  | -0.5422775 | 5.7823778  | 0.0000000 |
| C  | -2.2978407 | 4.0917916  | 0.0000000 |
| C  | -1.3701842 | 3.1033368  | 0.0000000 |
| C  | 0.0132925  | 3.5083549  | 0.0000000 |
| H  | -2.5685963 | 6.1381885  | 0.0000000 |
| N  | -1.8956761 | 5.3841242  | 0.0000000 |
| O  | -0.2828840 | 6.9757587  | 0.0000000 |
| N  | 0.3831945  | 4.7750487  | 0.0000000 |
| N  | 3.2355568  | -4.5792723 | 0.0000000 |
| H  | 4.1349169  | -4.1356771 | 0.0000000 |
| H  | 3.1746646  | -5.5823325 | 0.0000000 |
| O  | 1.3448931  | -0.3912846 | 0.0000000 |
| H  | -3.3631836 | 3.8973660  | 0.0000000 |
| N  | 0.9747642  | 2.5723455  | 0.0000000 |
| H  | 0.7851914  | 1.5787983  | 0.0000000 |
| H  | 1.9265577  | 2.9018876  | 0.0000000 |
| H  | 3.0787282  | -2.0732072 | 0.0000000 |
| Br | -4.0305180 | -2.9594638 | 0.0000000 |
| Br | -1.8487964 | 1.2865940  | 0.0000000 |

### 104 (IC···IG)

|   |            |            |           |
|---|------------|------------|-----------|
| C | -0.1607881 | -2.3485388 | 0.0000000 |
| C | -0.1062619 | -3.7409653 | 0.0000000 |
| C | 2.0935773  | -3.8977736 | 0.0000000 |
| C | 1.0755281  | -1.6205154 | 0.0000000 |
| C | -2.1780060 | -3.0063265 | 0.0000000 |
| N | -1.4621363 | -1.9004564 | 0.0000000 |
| N | -1.4134020 | -4.1436813 | 0.0000000 |
| H | -1.7450275 | -5.0985066 | 0.0000000 |
| N | 2.1622063  | -2.5315503 | 0.0000000 |
| N | 0.9667395  | -4.5635935 | 0.0000000 |
| C | -0.5089813 | 5.8438072  | 0.0000000 |
| C | -2.2889653 | 4.1804804  | 0.0000000 |
| C | -1.3807109 | 3.1715702  | 0.0000000 |
| C | 0.0087222  | 3.5608110  | 0.0000000 |
| H | -2.5294728 | 6.2306665  | 0.0000000 |
| N | -1.8680982 | 5.4661477  | 0.0000000 |
| O | -0.2311499 | 7.0331685  | 0.0000000 |
| N | 0.3994236  | 4.8220640  | 0.0000000 |
| I | -1.9374108 | 1.1840012  | 0.0000000 |
| I | -4.2194038 | -3.0829823 | 0.0000000 |
| N | 3.2682508  | -4.5739855 | 0.0000000 |
| H | 4.1594376  | -4.1141078 | 0.0000000 |
| H | 3.2261093  | -5.5780459 | 0.0000000 |
| O | 1.3030129  | -0.4206847 | 0.0000000 |
| H | -3.3587332 | 4.0103515  | 0.0000000 |
| N | 0.9667149  | 2.6185097  | 0.0000000 |
| H | 0.7737939  | 1.6262824  | 0.0000000 |
| H | 1.9197674  | 2.9445777  | 0.0000000 |
| H | 3.0652641  | -2.0707241 | 0.0000000 |



## Cartesian coordinates of the selected PDB examples:

### 1IJW

|    |            |            |            |
|----|------------|------------|------------|
| N  | 38.4180000 | 19.0430000 | 17.2310000 |
| C  | 38.6730000 | 20.1900000 | 16.5270000 |
| N  | 38.6970000 | 20.0000000 | 15.2350000 |
| C  | 38.4220000 | 18.6510000 | 15.0830000 |
| C  | 38.3240000 | 17.8620000 | 13.9100000 |
| O  | 38.4480000 | 18.2200000 | 12.7280000 |
| N  | 38.0480000 | 16.5360000 | 14.2130000 |
| C  | 37.8500000 | 16.0430000 | 15.4910000 |
| N  | 37.5550000 | 14.7330000 | 15.6060000 |
| N  | 37.9270000 | 16.7790000 | 16.5860000 |
| C  | 38.2260000 | 18.0550000 | 16.3070000 |
| Br | 37.4730000 | 14.5430000 | 8.0350000  |
| N  | 37.5890000 | 12.3350000 | 11.4990000 |
| C  | 37.5130000 | 12.7070000 | 10.1930000 |
| C  | 37.6810000 | 13.3020000 | 12.5120000 |
| O  | 37.6980000 | 12.9240000 | 13.6860000 |
| N  | 37.7360000 | 14.6190000 | 12.1750000 |
| C  | 37.6760000 | 14.9700000 | 10.8840000 |
| N  | 37.7290000 | 16.2780000 | 10.5820000 |
| C  | 37.5570000 | 13.9890000 | 9.8410000  |
| H  | 38.8536865 | 21.1485740 | 17.0339263 |
| H  | 37.4804327 | 14.3973548 | 16.5649316 |
| H  | 37.4257255 | 11.8982020 | 9.4523810  |
| H  | 37.9462333 | 16.9866065 | 11.3338217 |
| H  | 38.3218913 | 18.9278643 | 18.2402022 |
| H  | 37.5402034 | 11.3577331 | 11.7939656 |
| H  | 37.6238429 | 14.0427195 | 14.8301127 |
| H  | 37.9500470 | 15.8603968 | 13.4173510 |
| H  | 37.7314720 | 16.5720171 | 9.6055137  |

### 3BSU

|   |            |             |            |
|---|------------|-------------|------------|
| N | -1.6510000 | -21.7380000 | 26.2310000 |
| C | -0.3390000 | -21.8700000 | 25.8320000 |
| N | -0.1380000 | -21.5690000 | 24.5760000 |
| C | -1.3990000 | -21.2150000 | 24.1090000 |
| C | -1.8510000 | -20.7900000 | 22.8520000 |
| N | -1.0410000 | -20.6000000 | 21.8110000 |
| N | -3.1740000 | -20.5510000 | 22.7010000 |
| C | -3.9820000 | -20.7270000 | 23.7600000 |
| N | -3.6670000 | -21.1160000 | 25.0050000 |
| C | -2.3440000 | -21.3370000 | 25.1110000 |
| N | -6.7410000 | -19.4590000 | 19.4530000 |
| C | -6.1620000 | -19.8960000 | 20.6170000 |
| N | -4.7910000 | -19.8800000 | 20.6270000 |
| C | -3.9720000 | -19.4330000 | 19.6100000 |
| C | -4.6440000 | -18.9760000 | 18.4810000 |
| C | -5.9770000 | -19.0080000 | 18.4280000 |
| O | -6.8040000 | -20.2440000 | 21.5590000 |
| O | -2.7660000 | -19.4580000 | 19.7360000 |
| I | -3.4400000 | -18.1630000 | 16.7560000 |
| H | 0.4404315  | -22.1967268 | 26.5348851 |
| H | -0.0403149 | -20.7507283 | 21.9176787 |
| H | -5.0548947 | -20.5397642 | 23.5596701 |
| H | -6.5278027 | -18.6574702 | 17.5414602 |
| H | -7.7614884 | -19.4613389 | 19.4152102 |
| H | -2.0582504 | -21.9311049 | 27.1464953 |
| H | -1.4564071 | -20.2117525 | 20.9463186 |
| H | -4.2081448 | -20.1945687 | 21.4808971 |

### 3JXR

|   |            |            |            |
|---|------------|------------|------------|
| N | 13.6300000 | 14.5830000 | 10.3220000 |
| C | 12.2670000 | 14.6910000 | 10.1490000 |
| N | 11.6040000 | 13.5710000 | 10.2830000 |
| C | 12.6200000 | 12.6570000 | 10.5400000 |

|   |            |            |            |
|---|------------|------------|------------|
| C | 12.5520000 | 11.2690000 | 10.7920000 |
| O | 11.5370000 | 10.5680000 | 10.8380000 |
| N | 13.8060000 | 10.7260000 | 11.0150000 |
| C | 15.0050000 | 11.3830000 | 10.9930000 |
| N | 16.1180000 | 10.6540000 | 11.2150000 |
| N | 15.0880000 | 12.7030000 | 10.7720000 |
| C | 13.8630000 | 13.2420000 | 10.5620000 |
| N | 14.7160000 | 5.8470000  | 11.9950000 |
| C | 14.4800000 | 7.2030000  | 11.6960000 |
| O | 15.4340000 | 7.9430000  | 11.3900000 |
| N | 13.2010000 | 7.6530000  | 11.7650000 |
| C | 12.2180000 | 6.8830000  | 12.1040000 |
| N | 11.0260000 | 7.4670000  | 12.1430000 |
| C | 12.4540000 | 5.5080000  | 12.4090000 |
| F | 11.3360000 | 5.1320000  | 12.9110000 |
| C | 13.6920000 | 5.0520000  | 12.3310000 |
| H | 11.8080292 | 15.6674103 | 9.9328537  |
| H | 16.0513513 | 9.6276372  | 11.2964880 |
| H | 10.1677386 | 6.9650453  | 12.3543837 |
| H | 13.9345942 | 4.0150663  | 12.6156580 |
| H | 14.3392411 | 15.3121928 | 10.2513551 |
| H | 15.6697141 | 5.4949477  | 11.8971077 |
| H | 11.0038127 | 8.4498648  | 11.8199171 |
| H | 17.0103109 | 11.1360025 | 11.1405889 |
| H | 13.7775369 | 9.7081593  | 11.2145998 |

### 3KDE

|    |            |            |             |
|----|------------|------------|-------------|
| N  | 14.2640000 | 20.3810000 | -20.9290000 |
| C  | 15.5140000 | 19.7980000 | -21.1660000 |
| N  | 16.6570000 | 20.5030000 | -20.9850000 |
| C  | 16.6250000 | 21.7390000 | -20.4890000 |
| C  | 15.3120000 | 22.3670000 | -20.2480000 |
| C  | 14.1500000 | 21.6540000 | -20.5170000 |
| O  | 15.5560000 | 18.6150000 | -21.5830000 |
| O  | 17.6930000 | 22.3700000 | -20.2890000 |
| Br | 15.2270000 | 24.0920000 | -19.5960000 |
| N  | 22.4370000 | 17.3850000 | -22.3760000 |
| C  | 23.2780000 | 18.4350000 | -22.2060000 |
| N  | 22.6870000 | 19.5240000 | -21.7840000 |
| C  | 21.3530000 | 19.1410000 | -21.7010000 |
| C  | 20.2040000 | 19.8320000 | -21.3460000 |
| N  | 20.2150000 | 21.1310000 | -20.9810000 |
| N  | 19.0310000 | 19.1540000 | -21.3940000 |
| C  | 19.0200000 | 17.8610000 | -21.7430000 |
| N  | 20.0520000 | 17.1030000 | -22.0870000 |
| C  | 21.1920000 | 17.8310000 | -22.0530000 |
| H  | 13.1453062 | 22.0757807 | -20.3730677 |
| H  | 24.3564076 | 18.3440984 | -22.4000969 |
| H  | 19.3361458 | 21.6252797 | -20.7151993 |
| H  | 18.0140810 | 17.4019865 | -21.7529684 |
| H  | 13.4692917 | 19.7781777 | -21.1492610 |
| H  | 22.6624931 | 16.4395014 | -22.6880350 |
| H  | 21.1103865 | 21.6164612 | -20.9713793 |
| H  | 17.6082185 | 19.9645466 | -21.1490481 |

### 4HUG

|   |           |             |            |
|---|-----------|-------------|------------|
| N | 3.3420000 | -6.7630000  | 4.0010000  |
| C | 4.6980000 | -6.7710000  | 4.1820000  |
| N | 5.3730000 | -7.2090000  | 3.1500000  |
| C | 4.4040000 | -7.5110000  | 2.2130000  |
| C | 4.4770000 | -8.0210000  | 0.8990000  |
| N | 5.6230000 | -8.3290000  | 0.2670000  |
| N | 3.3070000 | -8.2030000  | 0.2470000  |
| C | 2.1600000 | -7.8990000  | 0.8730000  |
| N | 1.9690000 | -7.4130000  | 2.0950000  |
| C | 3.1450000 | -7.2400000  | 2.7230000  |
| N | 1.6450000 | -10.5400000 | -3.6940000 |
| C | 1.8380000 | -9.9660000  | -2.4150000 |

|    |           |             |            |
|----|-----------|-------------|------------|
| O  | 0.8900000 | -9.9670000  | -1.5950000 |
| N  | 3.0090000 | -9.4100000  | -2.0670000 |
| C  | 4.0320000 | -9.3940000  | -2.9280000 |
| O  | 5.1300000 | -8.8780000  | -2.6150000 |
| C  | 3.8610000 | -9.9980000  | -4.2720000 |
| C  | 2.6360000 | -10.5670000 | -4.5990000 |
| Cl | 5.1820000 | -9.9780000  | -5.3930000 |
| H  | 5.1493687 | -6.4350857  | 5.1264524  |
| H  | 6.5066343 | -8.1243447  | 0.7305586  |
| H  | 1.2557500 | -8.1215145  | 0.2759263  |
| H  | 2.4460549 | -11.0325914 | -5.5767448 |
| H  | 0.7168537 | -10.9374640 | -3.8448727 |
| H  | 2.6105363 | -6.4664556  | 4.6476374  |
| H  | 5.5884830 | -8.5427408  | -0.7522521 |
| H  | 3.1351569 | -8.9076188  | -1.0723590 |

#### 4XSN

|    |            |            |            |
|----|------------|------------|------------|
| N  | 15.3390000 | 11.6340000 | 32.1990000 |
| C  | 15.7460000 | 12.9640000 | 32.1170000 |
| O  | 14.8750000 | 13.8420000 | 32.1100000 |
| N  | 17.0590000 | 13.2110000 | 32.0560000 |
| C  | 17.9890000 | 12.2410000 | 32.0620000 |
| N  | 19.2730000 | 12.5960000 | 31.9910000 |
| C  | 17.6080000 | 10.8670000 | 32.1330000 |
| C  | 16.2680000 | 10.6200000 | 32.2070000 |
| N  | 18.8790000 | 19.8500000 | 31.9410000 |
| C  | 20.2260000 | 19.6400000 | 31.8330000 |
| N  | 20.5480000 | 18.3500000 | 31.8900000 |
| C  | 19.3410000 | 17.7210000 | 31.8130000 |
| C  | 18.3150000 | 18.6180000 | 31.9580000 |
| N  | 16.9910000 | 18.4000000 | 31.9920000 |
| C  | 16.7270000 | 17.1080000 | 32.0260000 |
| N  | 15.4240000 | 16.6640000 | 32.0770000 |
| N  | 17.7110000 | 16.1140000 | 31.9150000 |
| C  | 19.0890000 | 16.3190000 | 31.9550000 |
| O  | 19.9120000 | 15.4050000 | 31.8260000 |
| Br | 21.5510000 | 20.9920000 | 31.8630000 |
| H  | 20.0059173 | 11.8900486 | 31.9908159 |
| H  | 18.3344691 | 10.0448473 | 32.1383236 |
| H  | 15.8636918 | 9.5985201  | 32.2713209 |
| H  | 15.1862723 | 15.6523117 | 32.0909900 |
| H  | 18.3799536 | 20.7403050 | 31.9370603 |
| H  | 14.3350741 | 11.4501056 | 32.2500427 |
| H  | 19.5305632 | 13.6166409 | 31.9308423 |
| H  | 14.7014041 | 17.3786562 | 32.1191296 |
| H  | 17.4144030 | 15.1044869 | 31.9460516 |

#### 5AY3

|    |           |            |            |
|----|-----------|------------|------------|
| Br | 4.0720000 | 30.3600000 | 15.4740000 |
| N  | 7.1240000 | 31.2610000 | 12.8810000 |
| C  | 6.2910000 | 30.6220000 | 13.7500000 |
| C  | 6.7650000 | 32.5060000 | 12.3460000 |
| O  | 7.5420000 | 33.0710000 | 11.5680000 |
| N  | 5.5820000 | 33.0630000 | 12.6940000 |
| C  | 4.7760000 | 32.4270000 | 13.5450000 |
| N  | 3.6150000 | 33.0120000 | 13.8620000 |
| C  | 5.1260000 | 31.1630000 | 14.1040000 |
| N  | 4.4130000 | 39.6290000 | 11.2950000 |
| C  | 3.0890000 | 39.7020000 | 11.6580000 |
| N  | 2.6050000 | 38.5550000 | 12.0570000 |
| C  | 3.6790000 | 37.6770000 | 11.9600000 |
| C  | 3.7710000 | 36.2860000 | 12.2450000 |
| O  | 2.8940000 | 35.5220000 | 12.6610000 |
| N  | 5.0490000 | 35.7960000 | 11.9830000 |
| C  | 6.0970000 | 36.5380000 | 11.5000000 |
| N  | 7.2440000 | 35.8750000 | 11.2740000 |
| N  | 6.0250000 | 37.8290000 | 11.2440000 |
| C  | 4.7980000 | 38.3280000 | 11.4920000 |
| H  | 6.6416089 | 29.6617842 | 14.1558008 |
| H  | 2.9740862 | 32.5503365 | 14.5068105 |

|   |           |            |            |
|---|-----------|------------|------------|
| H | 2.5275027 | 40.6448994 | 11.5966535 |
| H | 7.3322592 | 34.8418149 | 11.3391943 |
| H | 8.0178090 | 30.8649992 | 12.5834820 |
| H | 8.0038763 | 36.4179466 | 10.8689773 |
| H | 5.2084138 | 34.7762756 | 12.1788748 |
| H | 3.3344782 | 33.9270928 | 13.4111607 |
| H | 5.0186882 | 40.3745617 | 10.9513052 |

## 7EDT

|    |            |            |            |
|----|------------|------------|------------|
| N  | -3.0300000 | 16.8340000 | 16.2440000 |
| C  | -3.9200000 | 16.3320000 | 17.1610000 |
| N  | -3.4040000 | 15.4090000 | 17.9380000 |
| C  | -2.0900000 | 15.2860000 | 17.4990000 |
| C  | -1.0070000 | 14.4820000 | 17.9080000 |
| N  | -1.0700000 | 13.5860000 | 18.9020000 |
| N  | 0.1600000  | 14.6320000 | 17.2410000 |
| C  | 0.2390000  | 15.5160000 | 16.2430000 |
| N  | -0.7050000 | 16.3290000 | 15.7780000 |
| C  | -1.8530000 | 16.1600000 | 16.4530000 |
| N  | 4.6390000  | 12.4920000 | 17.1240000 |
| C  | 3.4650000  | 13.1840000 | 16.8100000 |
| O  | 3.3620000  | 13.8590000 | 15.7780000 |
| N  | 2.4140000  | 13.1310000 | 17.7210000 |
| C  | 2.4760000  | 12.4010000 | 18.9370000 |
| O  | 1.4840000  | 12.4070000 | 19.6550000 |
| C  | 3.7110000  | 11.7230000 | 19.1590000 |
| C  | 4.7620000  | 11.7480000 | 18.3000000 |
| Br | 3.8660000  | 10.7510000 | 20.7670000 |
| H  | -4.9555687 | 16.6953921 | 17.2162222 |
| H  | -1.9358304 | 13.5035416 | 19.4317393 |
| H  | 1.2261253  | 15.5504804 | 15.7448515 |
| H  | 5.7099060  | 11.2235786 | 18.4765704 |
| H  | -3.1847767 | 17.5485825 | 15.5321736 |
| H  | 5.3888753  | 12.5540816 | 16.4332180 |
| H  | -0.2064285 | 13.1077861 | 19.2223021 |
| H  | 1.5182133  | 13.7100598 | 17.5124729 |

## 1OMK

|   |            |            |           |
|---|------------|------------|-----------|
| N | 11.1290000 | 12.4670000 | 7.7980000 |
| C | 11.5320000 | 11.1470000 | 7.7550000 |
| N | 10.5290000 | 10.3010000 | 7.6870000 |
| C | 9.4230000  | 11.1060000 | 7.6840000 |
| C | 8.0540000  | 10.8070000 | 7.6290000 |
| N | 7.6010000  | 9.5430000  | 7.5550000 |
| N | 7.2020000  | 11.8270000 | 7.6440000 |
| C | 7.6440000  | 13.0980000 | 7.7190000 |
| N | 8.9310000  | 13.4970000 | 7.7820000 |
| C | 9.7560000  | 12.4420000 | 7.7530000 |
| N | 2.4780000  | 12.2010000 | 8.2610000 |
| C | 3.8690000  | 12.2910000 | 8.0970000 |
| N | 4.6200000  | 11.1840000 | 7.9880000 |
| C | 4.0260000  | 9.9870000  | 8.0780000 |
| C | 2.6350000  | 9.8810000  | 8.2340000 |
| C | 1.8910000  | 10.9870000 | 8.3160000 |
| O | 4.3540000  | 13.4010000 | 8.0390000 |
| O | 4.7920000  | 8.8990000  | 7.9840000 |
| I | 1.7510000  | 7.9860000  | 8.3380000 |
| H | 12.5952616 | 10.8713855 | 7.7781402 |
| H | 8.2952659  | 8.7982112  | 7.6094700 |
| H | 6.8504352  | 13.8637007 | 7.7473379 |
| H | 0.7968149  | 10.9646385 | 8.4338266 |
| H | 6.5871969  | 9.2968012  | 7.6641477 |
| H | 11.7099930 | 13.3040428 | 7.8557654 |
| H | 1.9805497  | 13.0904134 | 8.3182506 |
| H | 5.7103788  | 11.3990356 | 7.8200257 |
